# Supplementary material for: Alkali metal complex-mediated ring-opening polymerization of rac-LA, ε-caprolactone, and δ-valerolactone
Source: Royal Society of Chemistry journal article supplement (doi:10.1039/c9nj01130g), 2019-01-01
Supplement: c9nj01130g1.pdf [file c9nj01130g1.pdf]

*Supporting Information for*

**Alkali Metal Complex–Mediated Ring-opening Polymerization of *rac*-LA,  $\epsilon$ -Caprolactone, and  $\delta$ -Valerolactone**

Adimulam Harinath, Jayeeta Bhattacharjee, Alok Sarkar and Tarun K. Panda\*

*Department of Chemistry, Indian Institute of Technology Hyderabad, Kandi, Sangareddy, 502285, Telangana, India. Fax: + 91(40) 2301 6032; Tel: + 91(40) 2301 6036; E-mail: tpanda@iith.ac.in*

**Table of Contents**

1. Table TS1. Crystallographic data and refinement parameters of **1-H**, **2-H**, **3b**, **4a** and **4b**.
2. Figure FS1 Molecular solid-state structure of **1-H**.
3. Figure FS2 Molecular solid-state structure of **2-H**.
4. Figure FS3:  $^1\text{H}$  NMR spectra of complex **1-H**.
5. Figure FS4:  $^{31}\text{P}$  NMR spectra of complex **1-H**.
6. Figure FS5:  $^{19}\text{F}$  NMR spectra of complex **1-H**.
7. Figure FS6:  $^{13}\text{C}$  NMR spectra of complex **1-H**.
8. Figure FS7:  $^1\text{H}$  NMR spectra of complex **2-H**.
9. Figure FS8:  $^{31}\text{P}$  NMR spectra of complex **2-H**.
10. Figure FS9:  $^{13}\text{C}$  NMR spectra of complex **2-H**.
11. Figure FS10:  $^1\text{H}$  NMR spectra of complex **3a**.
12. Figure FS11:  $^{31}\text{P}$  NMR spectra of complex **3a**.
13. Figure FS12:  $^{19}\text{F}$  NMR spectra of complex **3a**.
14. Figure FS13:  $^{13}\text{C}$  NMR spectra of complex **3a**.
15. Figure FS14:  $^1\text{H}$  NMR spectra of complex **3b**.
16. Figure FS15:  $^{31}\text{P}$  NMR spectra of complex **3b**.
17. Figure FS16:  $^{13}\text{C}$  NMR spectra of complex **3b**.
18. Figure FS17:  $^1\text{H}$  NMR spectra of complex **4a**.
19. Figure FS18:  $^{31}\text{P}$  NMR spectra of complex **4a**.
20. Figure FS19:  $^{19}\text{F}$  NMR spectra of complex **4a**.
21. Figure FS20:  $^{13}\text{C}$  NMR spectra of complex **4a**.
22. Figure FS21:  $^1\text{H}$  NMR spectra of complex **4b**.
23. Figure FS22:  $^{31}\text{P}$  NMR spectra of complex **4b**.
24. Figure FS23:  $^{13}\text{C}$  NMR spectra of complex **4b**.
25. Figure FS24:  $^1\text{H}$  NMR spectra of complex **5a**.
26. Figure FS25:  $^{31}\text{P}$  NMR spectra of complex **5a**.
27. Figure FS26:  $^{19}\text{F}$  NMR spectra of complex **5a**.
28. Figure FS27:  $^{13}\text{C}$  NMR spectra of complex **5a**.

29. Figure FS28: <sup>1</sup>H NMR spectra of complex **5b**.  
 30. Figure FS29: <sup>31</sup>P NMR spectra of complex **5b**.  
 31. Figure FS30: <sup>13</sup>C NMR spectra of complex **5b**.  
 32. Kinetic studies.  
 33. Characterization of polymers.

**Table TS1.** Crystallographic data and refinement parameters of **1-H**, **2-H**, **3b**, **4a**, and **4b**.

| Crystal Parameters                          | 1-H                                                                    | 2-H                                                                | 3b.THF                                                                | 4a                                                                 | 4b                                                                  |
|---------------------------------------------|------------------------------------------------------------------------|--------------------------------------------------------------------|-----------------------------------------------------------------------|--------------------------------------------------------------------|---------------------------------------------------------------------|
| CCDC No.                                    | 1849552                                                                | 1849551                                                            | 1849553                                                               | 1849554                                                            | 1849555                                                             |
| Empirical formula                           | C <sub>18</sub> H <sub>15</sub> FN PSe                                 | C <sub>18</sub> H <sub>15</sub> N <sub>2</sub> O <sub>2</sub> PSe  | C <sub>30</sub> H <sub>38</sub> LiN <sub>2</sub> O <sub>5</sub> PSe   | C <sub>30</sub> H <sub>38</sub> FNNaO <sub>3</sub> PSe             | C <sub>30</sub> H <sub>38</sub> N <sub>2</sub> NaO <sub>5</sub> PSe |
| Formula weight                              | 374.24                                                                 | 401.25                                                             | 623.49                                                                | 612.53                                                             | 639.54                                                              |
| <i>T</i> (K)                                | 293(2) K                                                               | 293(2) K                                                           | 150(2) K                                                              | 150(2) K                                                           | 150(2) K                                                            |
| $\lambda$ (Å)                               | 1.54184 Å                                                              | 1.54184 Å                                                          | 1.54184 Å                                                             | 0.71073 Å                                                          | 1.54184 Å                                                           |
| Crystal system                              | Monoclinic                                                             | Monoclinic                                                         | Monoclinic                                                            | Monoclinic                                                         | Orthorhombic                                                        |
| Space group                                 | <i>P</i> 2 <sub>1</sub> /c                                             | <i>C</i> 2/c                                                       | <i>P</i> 2 <sub>1</sub> /c                                            | <i>P</i> 2 <sub>1</sub>                                            | <i>P</i> bca                                                        |
| <i>a</i> (Å)                                | 9.9310(5)                                                              | 27.298(3)                                                          | 10.3315(9)                                                            | 9.9424(17)                                                         | 17.2014(7)                                                          |
| <i>b</i> (Å)                                | 16.1798(5)                                                             | 9.3728(5)                                                          | 18.068(2)                                                             | 15.5693(7)                                                         | 17.4404(7)                                                          |
| <i>c</i> (Å)                                | 13.6047(7)                                                             | 16.0877(15)                                                        | 18.204(2)                                                             | 10.617(5)                                                          | 20.4846(17)                                                         |
| $\alpha$ (°)                                | 90                                                                     | 90                                                                 | 90                                                                    | 90                                                                 | 90                                                                  |
| $\beta$ (°)                                 | 130.222(3)                                                             | 122.050(13)                                                        | 113.795(8)                                                            | 113.65(4)                                                          | 90                                                                  |
| $\gamma$ (°)                                | 90                                                                     | 90                                                                 | 90                                                                    | 90                                                                 | 90                                                                  |
| <i>V</i> (Å <sup>3</sup> )                  | 1669.13(14)                                                            | 3488.7(5)                                                          | 3109.3(6)                                                             | 1505.4(8)                                                          | 6145.4(4)                                                           |
| <i>Z</i>                                    | 4                                                                      | 8                                                                  | 4                                                                     | 2                                                                  | 8                                                                   |
| <i>D</i> <sub>calc</sub> g cm <sup>-3</sup> | 1.489                                                                  | 1.528                                                              | 1.332                                                                 | 1.351                                                              | 1.382                                                               |
| $\mu$ (mm <sup>-1</sup> )                   | 3.997                                                                  | 3.890                                                              | 1.298                                                                 | 1.352                                                              | 2.618                                                               |
| <i>F</i> (000)                              | 752                                                                    | 1616.0                                                             | 1296                                                                  | 636                                                                | 2656                                                                |
| Theta range for data collection             | 5.060 to 70.258 deg                                                    | 3.82 to 70.76 deg                                                  | 3.02 to 29.11 deg                                                     | 3.349 to 28.948 deg                                                | 4.21 to 70.57 deg                                                   |
| Limiting indices                            | -8 ≤ <i>h</i> ≤ 12,<br>-<br>19 ≤ <i>k</i> ≤ 18,<br>-16 ≤ <i>l</i> ≤ 13 | -30 ≤ <i>h</i> ≤ 33,<br>-8 ≤ <i>k</i> ≤ 11,<br>-19 ≤ <i>l</i> ≤ 19 | --13 ≤ <i>h</i> ≤ 13,<br>-23 ≤ <i>k</i> ≤ 24,<br>-22 ≤ <i>l</i> ≤ 20. | -12 ≤ <i>h</i> ≤ 13,<br>-19 ≤ <i>k</i> ≤ 18,<br>-13 ≤ <i>l</i> ≤ 9 | -20 ≤ <i>h</i> ≤ 19,<br>-21 ≤ <i>k</i> ≤ 21,<br>-18 ≤ <i>l</i> ≤ 24 |
| Reflections collected / unique              | 7494 / 3126<br>[ <i>R</i> (int) = 0.0226]                              | 7342 / 3298<br>[ <i>R</i> (int) = 0.0307]                          | 14754 / 7134<br>[ <i>R</i> (int) = 0.0368]                            | 6394 / 5152<br>[ <i>R</i> (int) = 0.0202]                          | 28196 / 5806<br>[ <i>R</i> (int) = 0.0714]                          |
| Completeness to theta                       | 99.8 %                                                                 | 98.1 %                                                             | 99.8 %                                                                | 99.7%                                                              | 98.7 %                                                              |
| Absorption correction                       | Multi-scan                                                             | Multi-scan                                                         | Multi-scan                                                            | Multi-scan                                                         | Multi-scan                                                          |

|                                   |                                             |                                             |                                             |                                             |                                             |
|-----------------------------------|---------------------------------------------|---------------------------------------------|---------------------------------------------|---------------------------------------------|---------------------------------------------|
| Max. and min. transmission        | 1.00000 and 0.60794                         | 1.00000 and 0.30530                         | 1.00000 and 0.90361                         | 1.00000 and 0.91034                         | 1.00000 and 0.38059                         |
| Refinement method                 | Full-matrix least-squares on F <sup>2</sup> |
| Data /restraints / parameters     | 3126 / 0 / 200                              | 3298 / 0 / 217                              | 7134/0/361                                  | 5152 / 203 / 436                            | 5806/ 0 / 362                               |
| Goodness-of-fit on F <sup>2</sup> | 1.072                                       | 1.023                                       | 1.065                                       | 1.080                                       | 1.062                                       |
| Final R indices [I>2sigma(I)]     | R1 = 0.0345, wR2 = 0.0949                   | R1 = 0.0385, wR2 = 0.0987                   | R1 = 0.0487, wR2 = 0.1101                   | R1 = 0.0358, wR2 = 0.0878                   | R1 = 0.0672, wR2 = 0.1807                   |
| R indices (all data)              | R1 = 0.0365, wR2 = 0.0968                   | R1 = 0.0480, wR2 = 0.1057                   | R1 = 0.0670, wR2 = 0.1202                   | R1 = 0.0401, wR2 = 0.0912                   | R1 = 0.0846, wR2 = 0.2104                   |
| Flack parameter                   | -                                           | -                                           | -                                           | -0.002(12)                                  | -                                           |
| Largest diff. peak and hole       | 0.343 and -0.623 e.Å <sup>-3</sup>          | 0.265 and -0.576 e. Å <sup>-3</sup>         | 0.546 and -0.451 e. Å <sup>-3</sup>         | 0.832 and -0.865 e. Å <sup>-3</sup>         | 0.691 and -1.176 e. Å <sup>-3</sup>         |

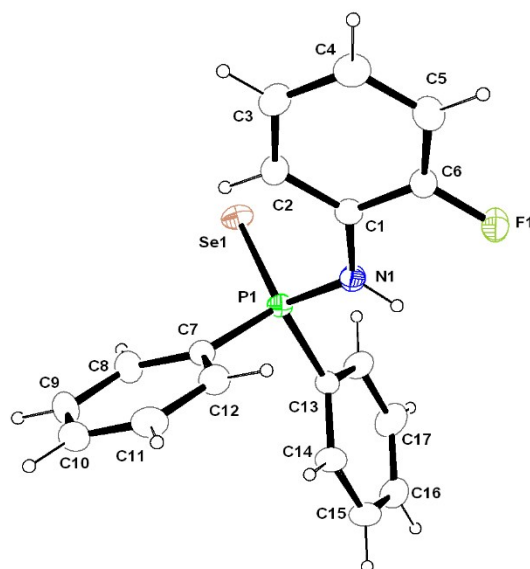

**Figure FS1.** Molecular solid-state structure of **1-H**. Selected bond lengths (Å) and angles (°) are: P1–Se1 2.1047(5), P1–N1 1.6779(17), P1–C7 1.811(2), F1–C6 1.365(2), N1–C1 1.408(3), P1–C13 1.815(2), C5–C6 1.368(3), N1–P1–Se1 116.13(7), C13–P1–Se1 113.25(7), C7–P1–Se1 113.53(7), N1–P1–C7 104.64(10), C7–P1–C13 106.45(9), F1–C6–C5 119.91(19).

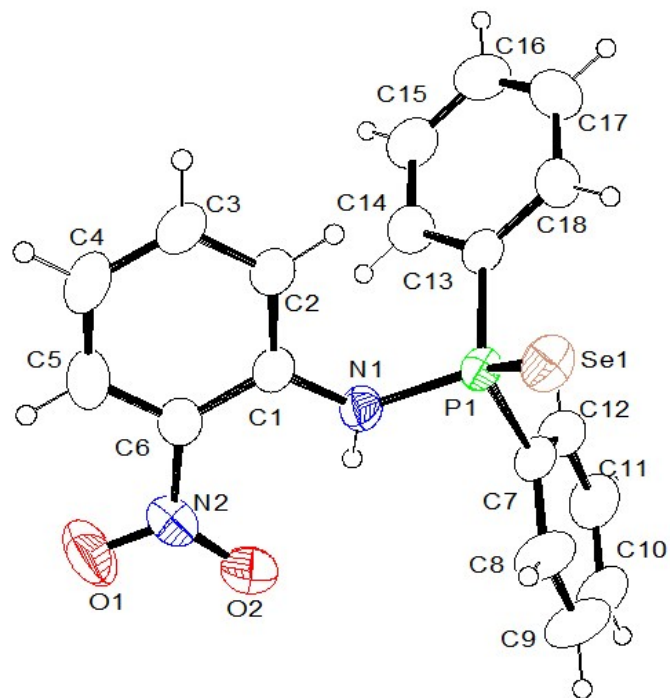

**Figure FS2.** Molecular solid-state structure of **2-H**. Selected bond lengths (Å) and angles (°) are: P1–Se1 2.0948(8), P1–N1 1.682(2), P1–C13 1.806(3), O1–N2 1.217(2), N2–O2 1.231(4), N1–C1 1.387(3), C6–N2 1.454(4), C5–C6 1.388(4), N1–P1–Se1 114.58(9), C13–P1–Se1 113.06(9), C7–P1–Se1 114.58(9), C13–P1–C7 108.19(13), N2–P1–C13 105.69(12), N1–P1–C7 98.67(12).

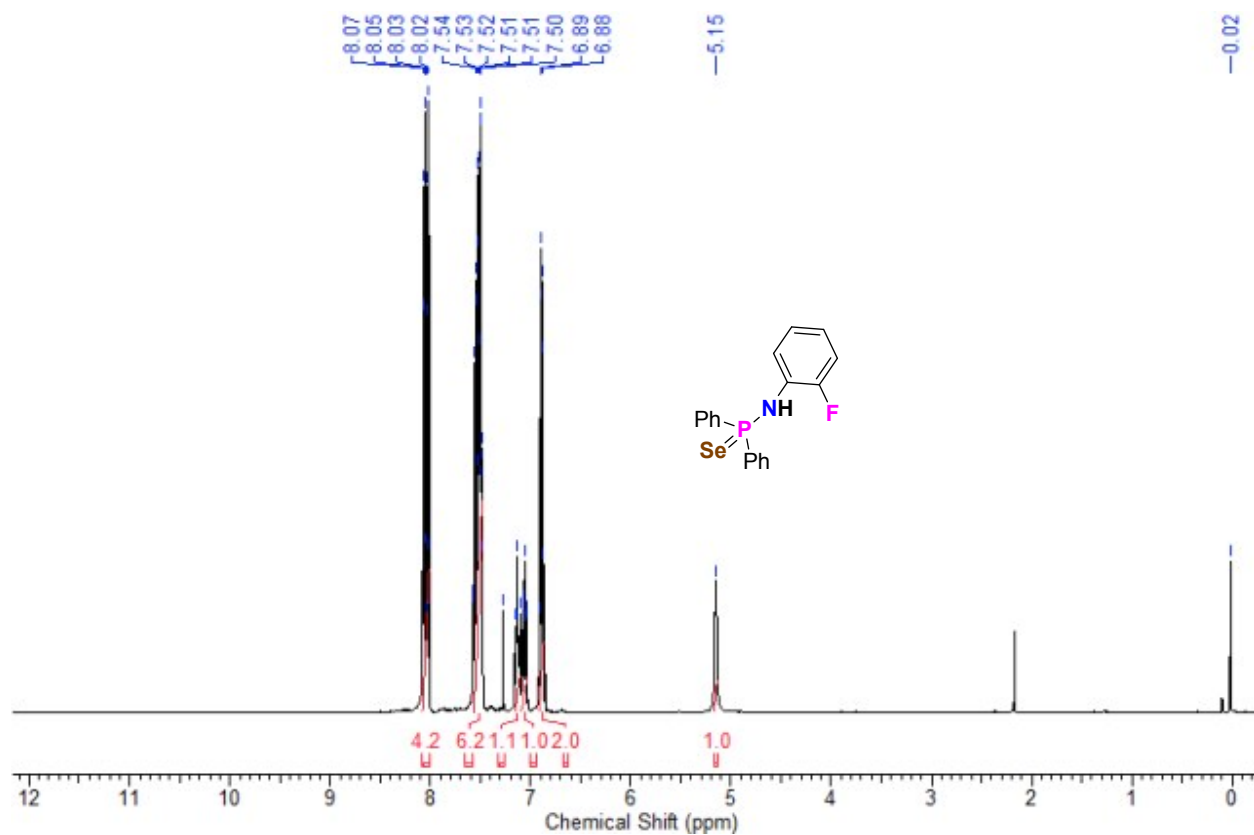

Figure FS3:  $^1\text{H}$  NMR spectra of complex 1-H.

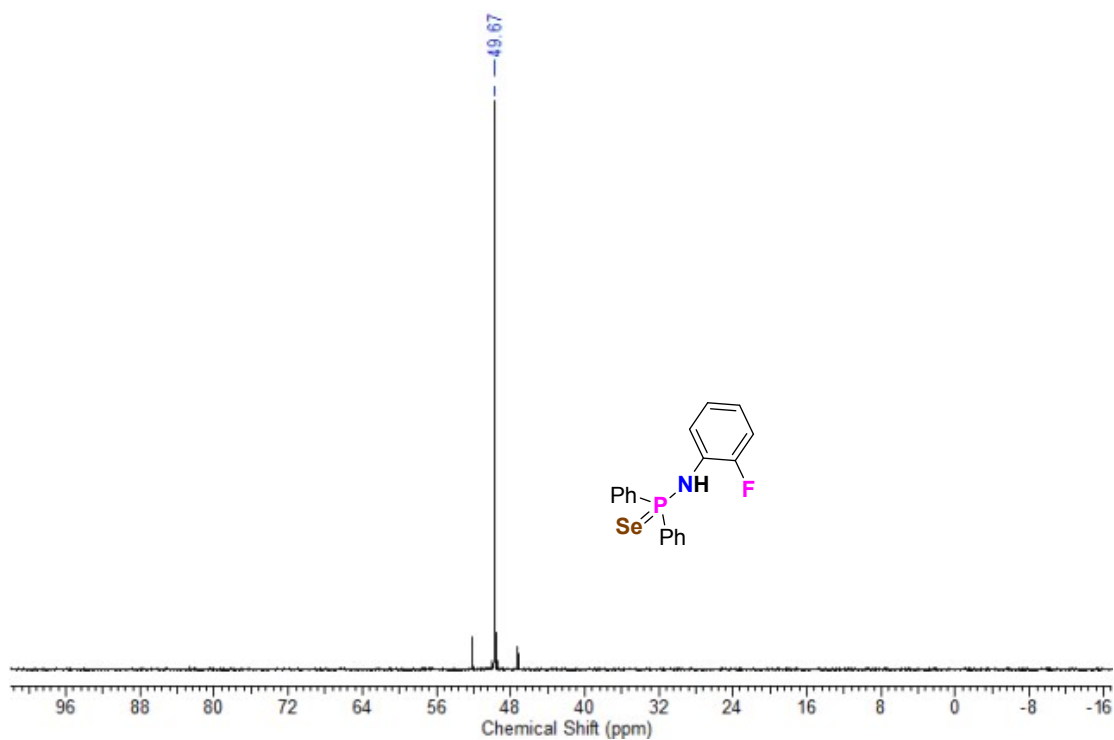

Figure FS4:  $^{31}\text{P}$  NMR spectra of complex 1-H.

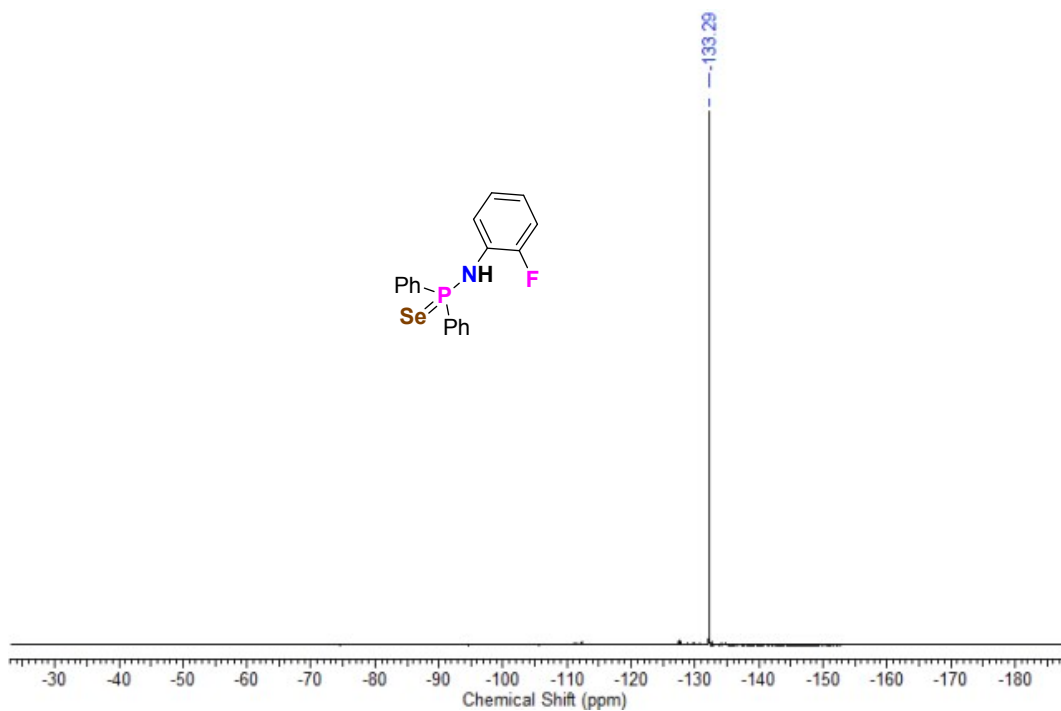

Figure FS5:  $^{19}\text{F}$  NMR spectra of complex 1-H.

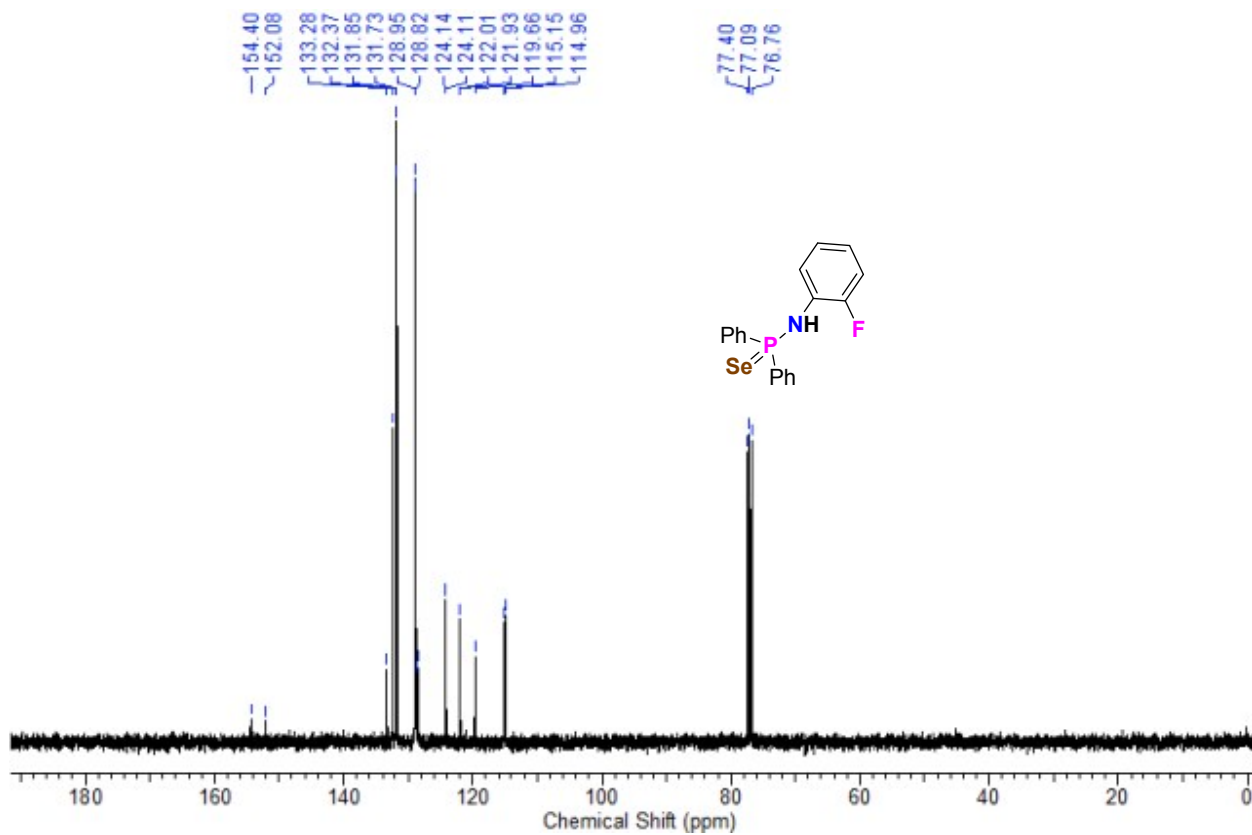

Figure FS6:  $^{13}\text{C}$  NMR spectra of complex 1-H.

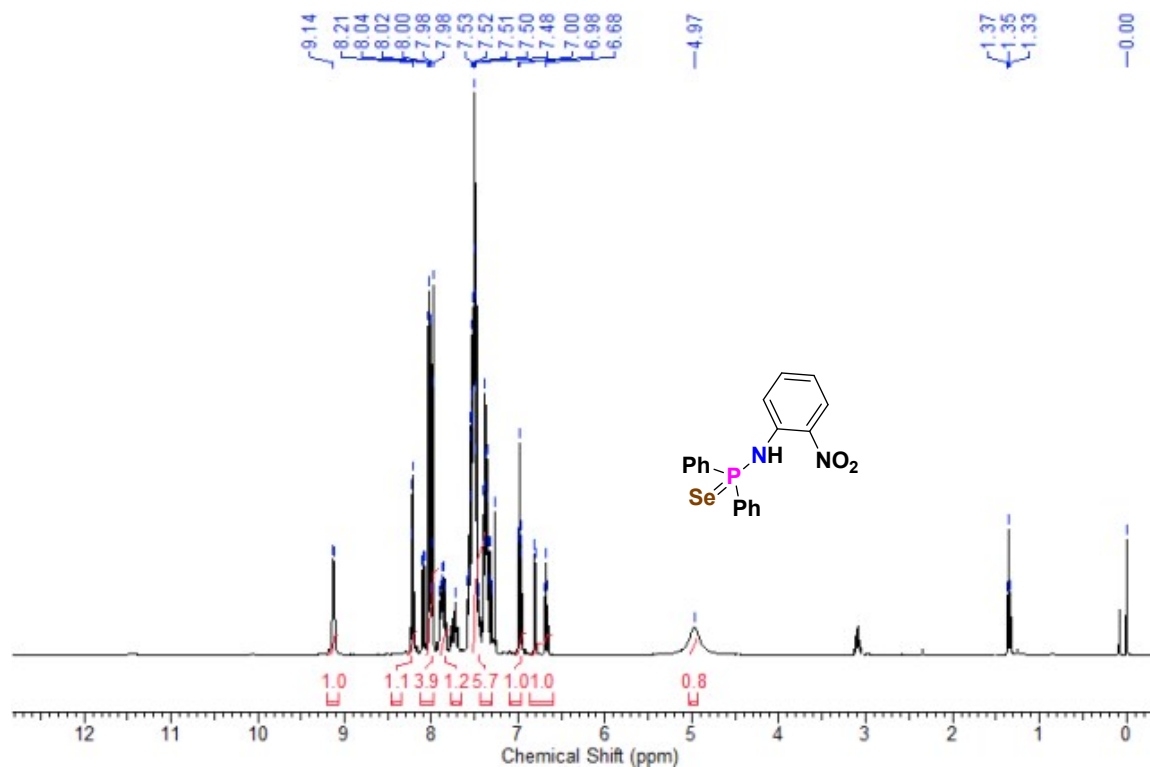

Figure FS7:  $^1\text{H}$  NMR spectra of complex 2-H.

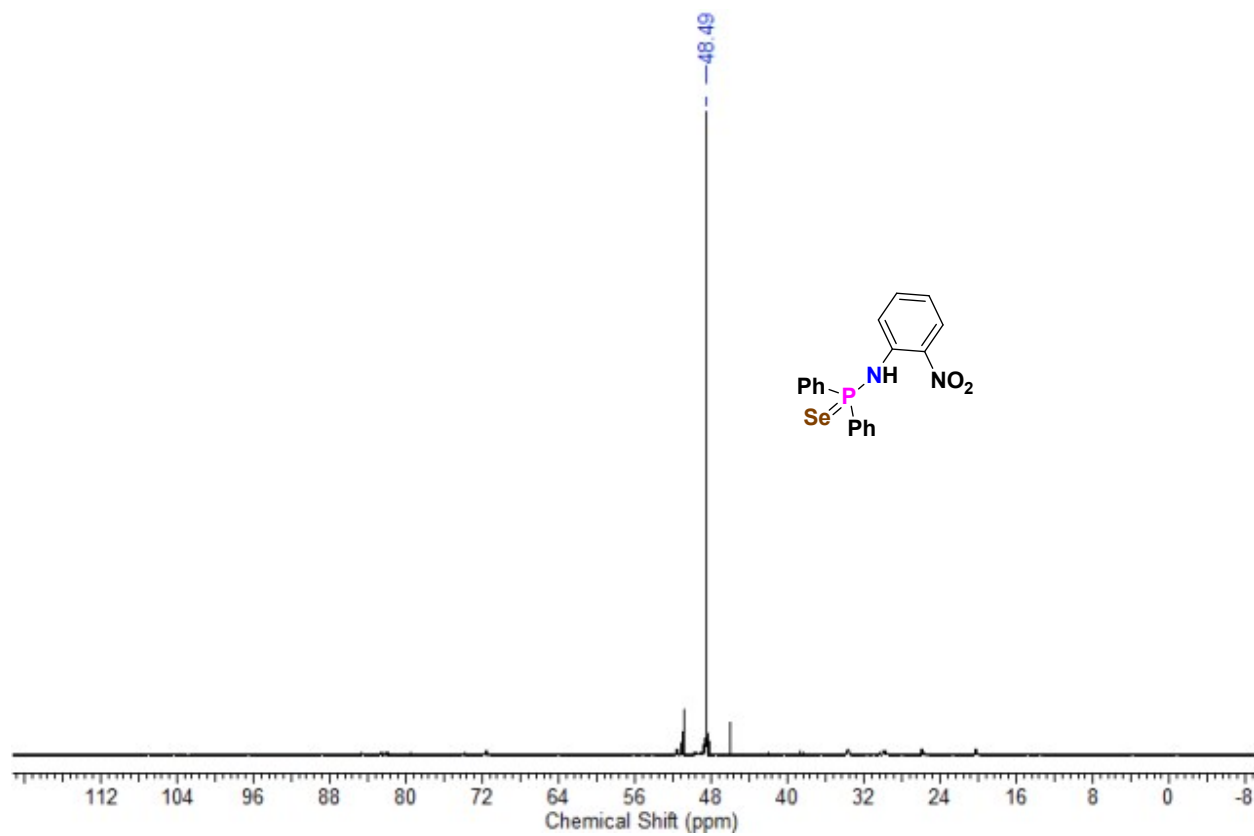

Figure FS8:  $^{31}\text{P}$  NMR spectra of complex 2-H.

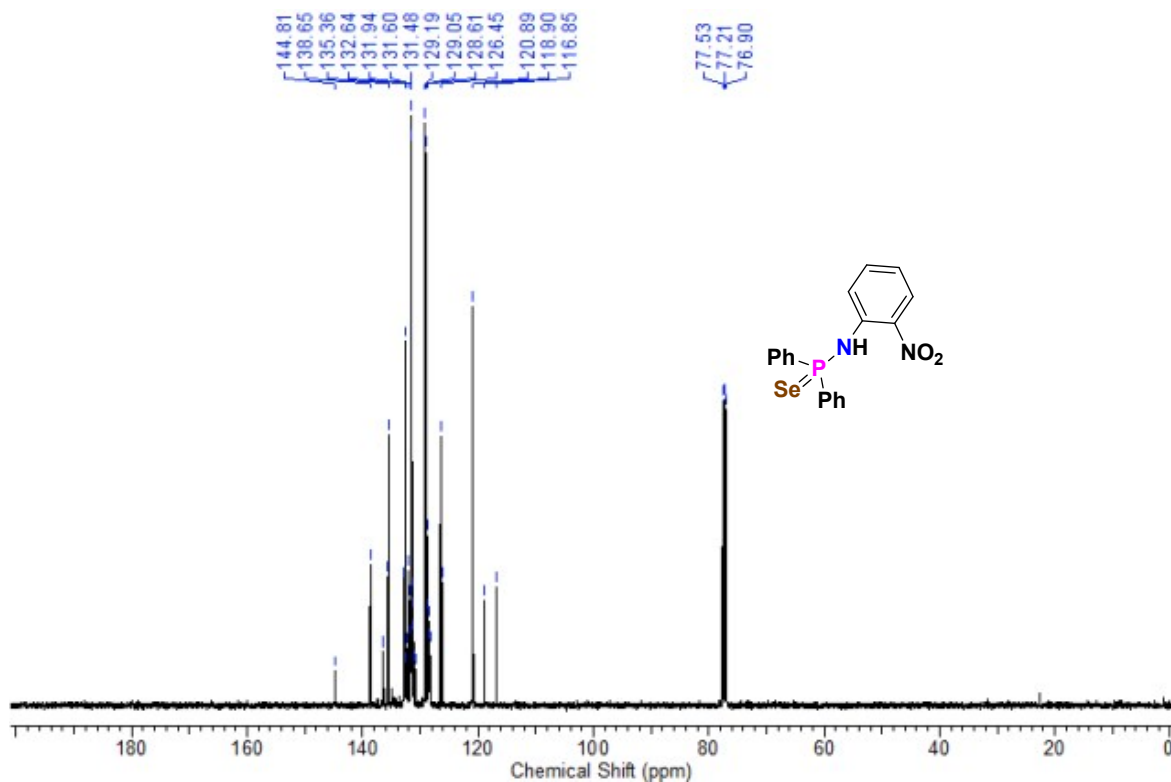

Figure FS9: <sup>13</sup>C NMR spectra of complex 2-H.

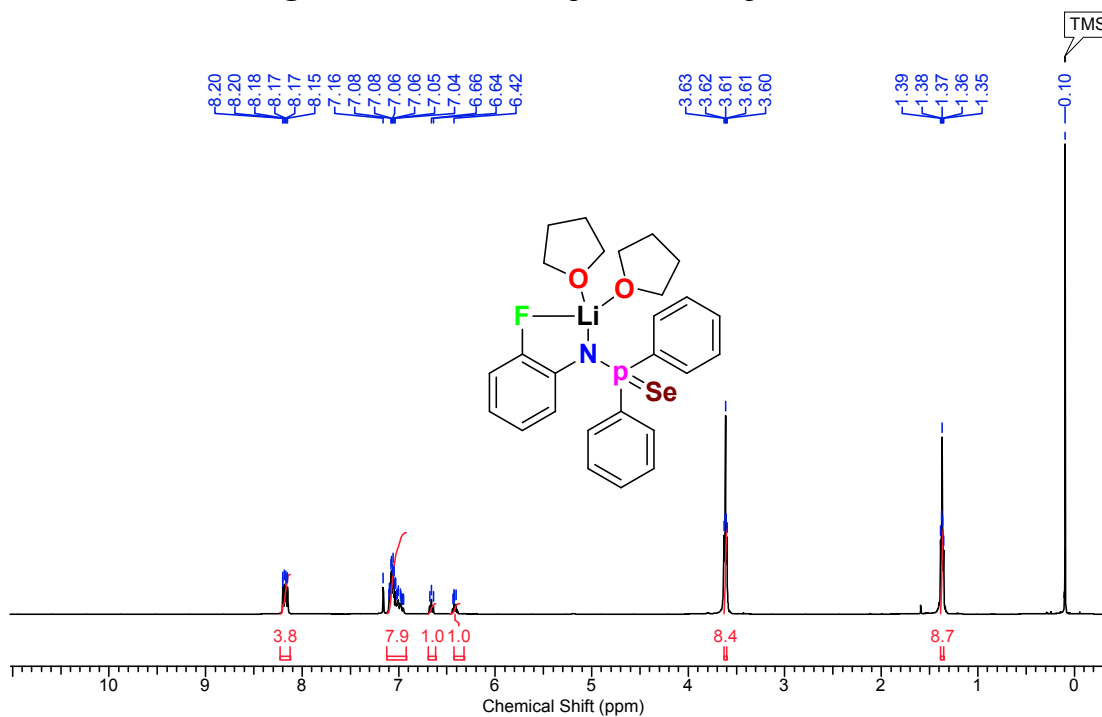

Figure FS10: <sup>1</sup>H NMR spectra of complex 3a.



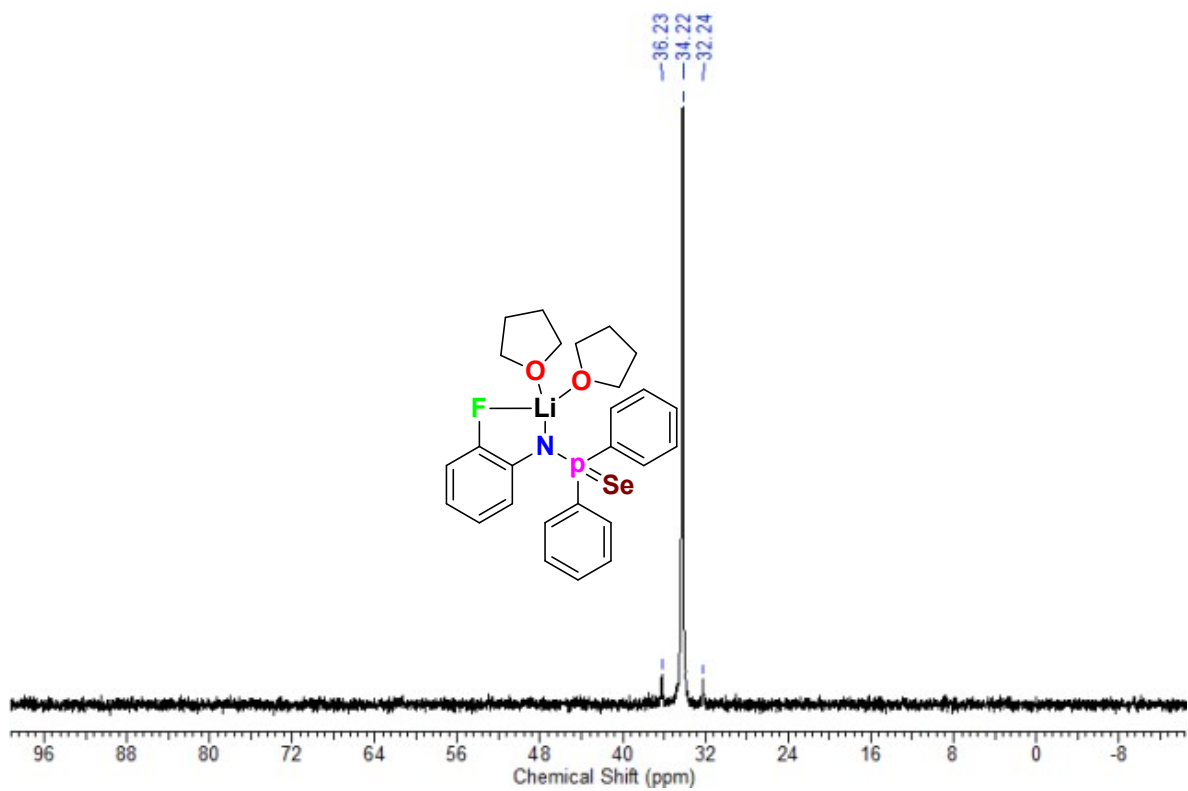

Figure FS11:  $^{31}\text{P}$  NMR spectra of complex 3a.

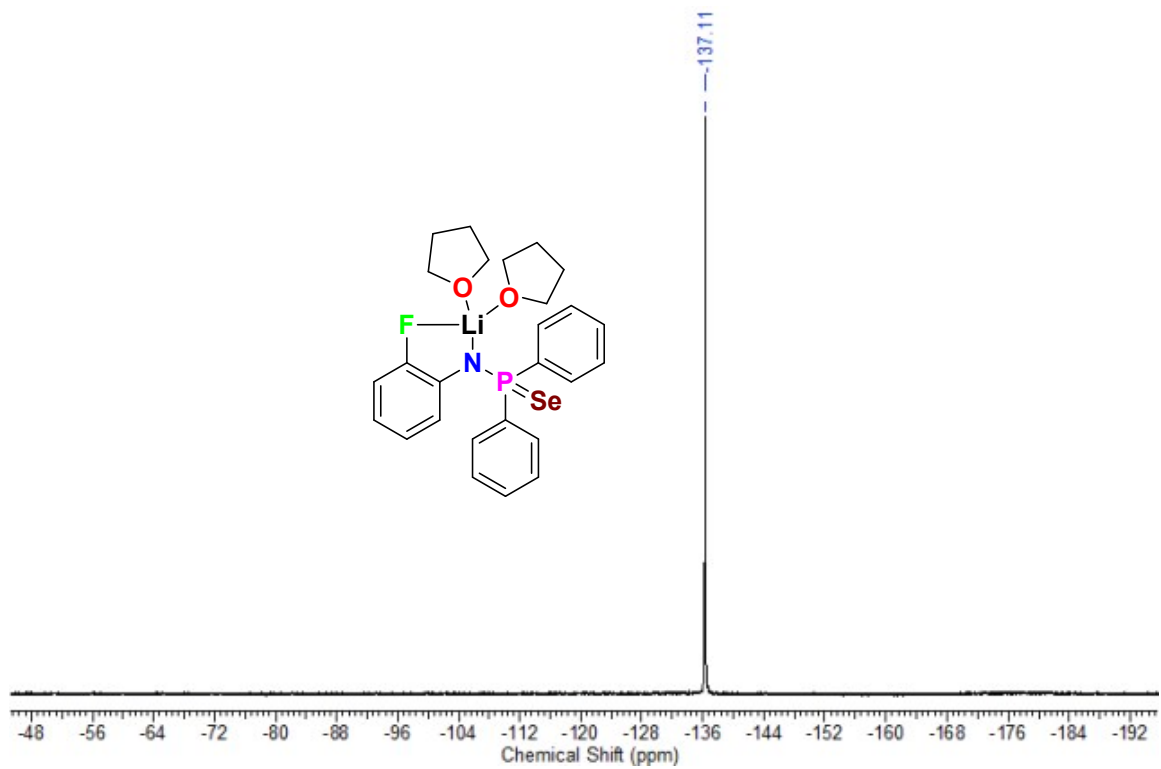

Figure FS12:  $^{19}\text{F}$  NMR spectra of complex 3a.

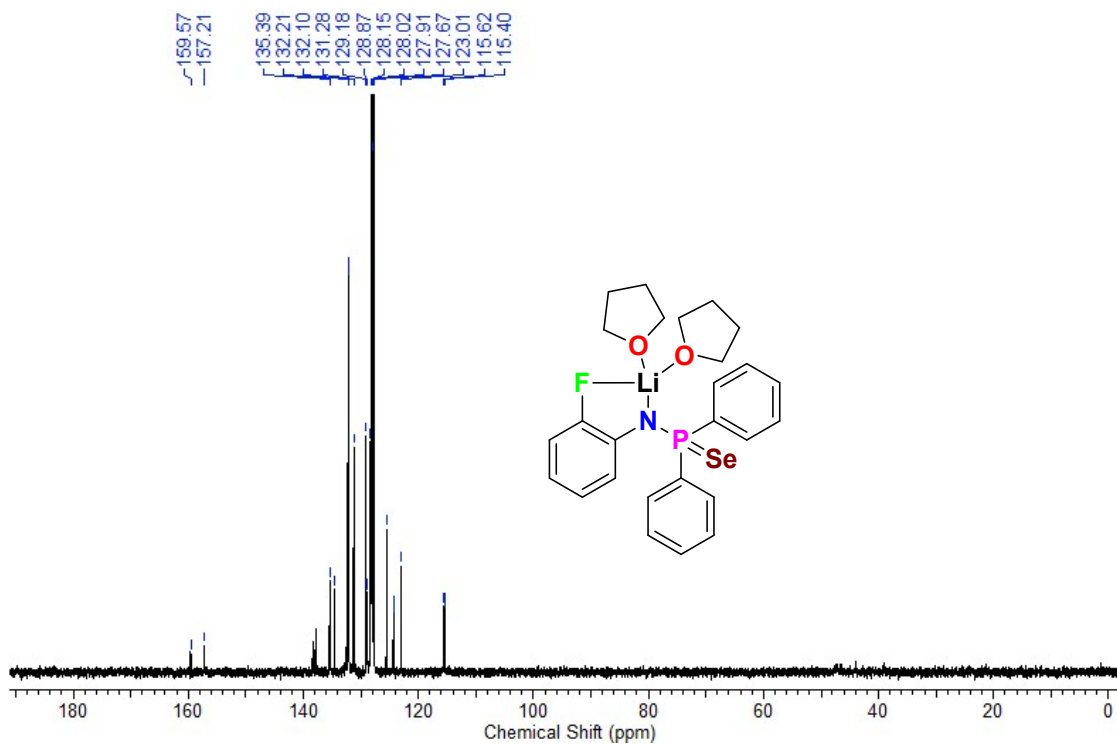

Figure FS13:  $^{13}\text{C}$  NMR spectra of complex **3a**.

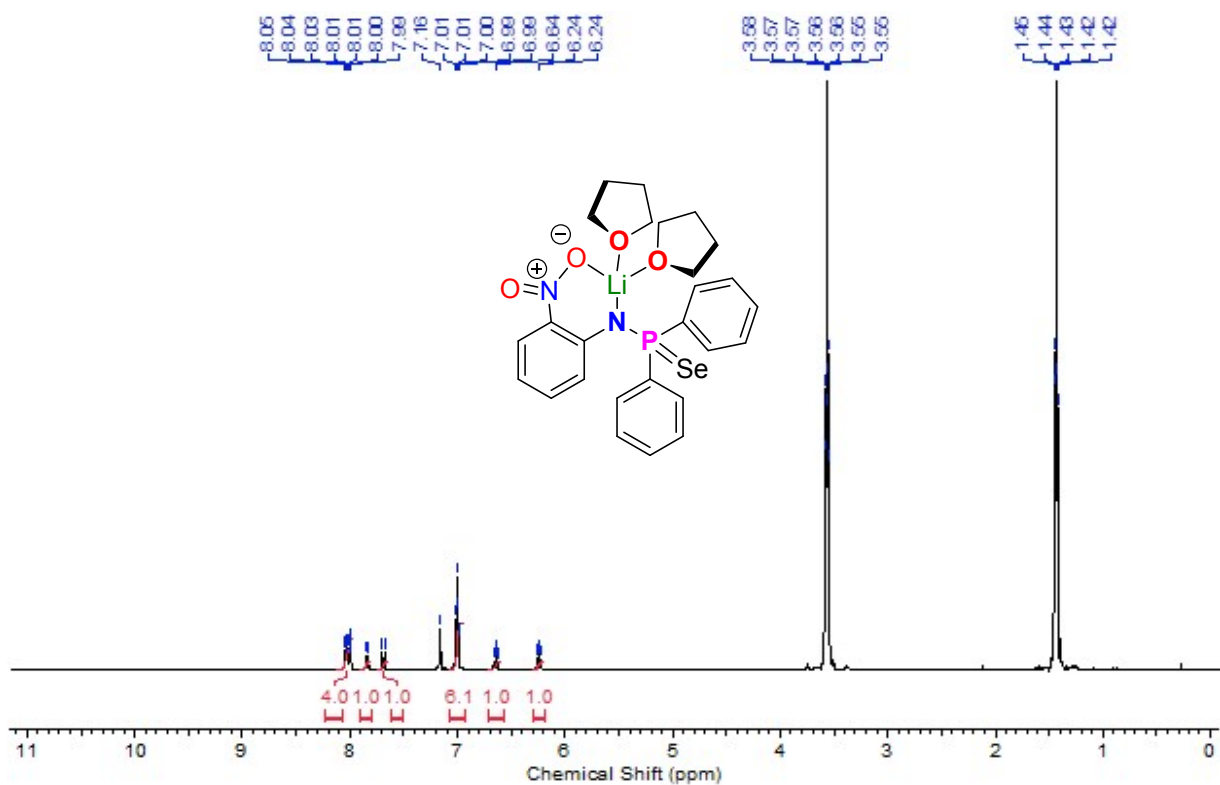

Figure FS14:  $^1\text{H}$  NMR spectra of complex **3b**.

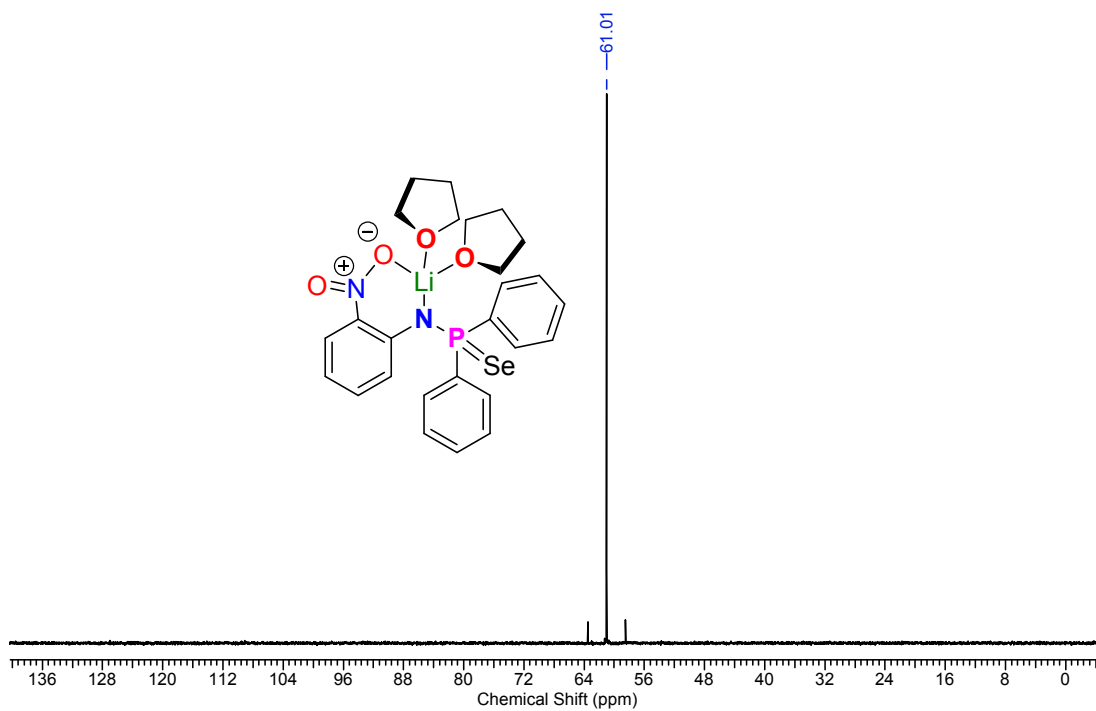

**Figure FS15:**  $^{31}\text{P}$  NMR spectra of complex **3b**.

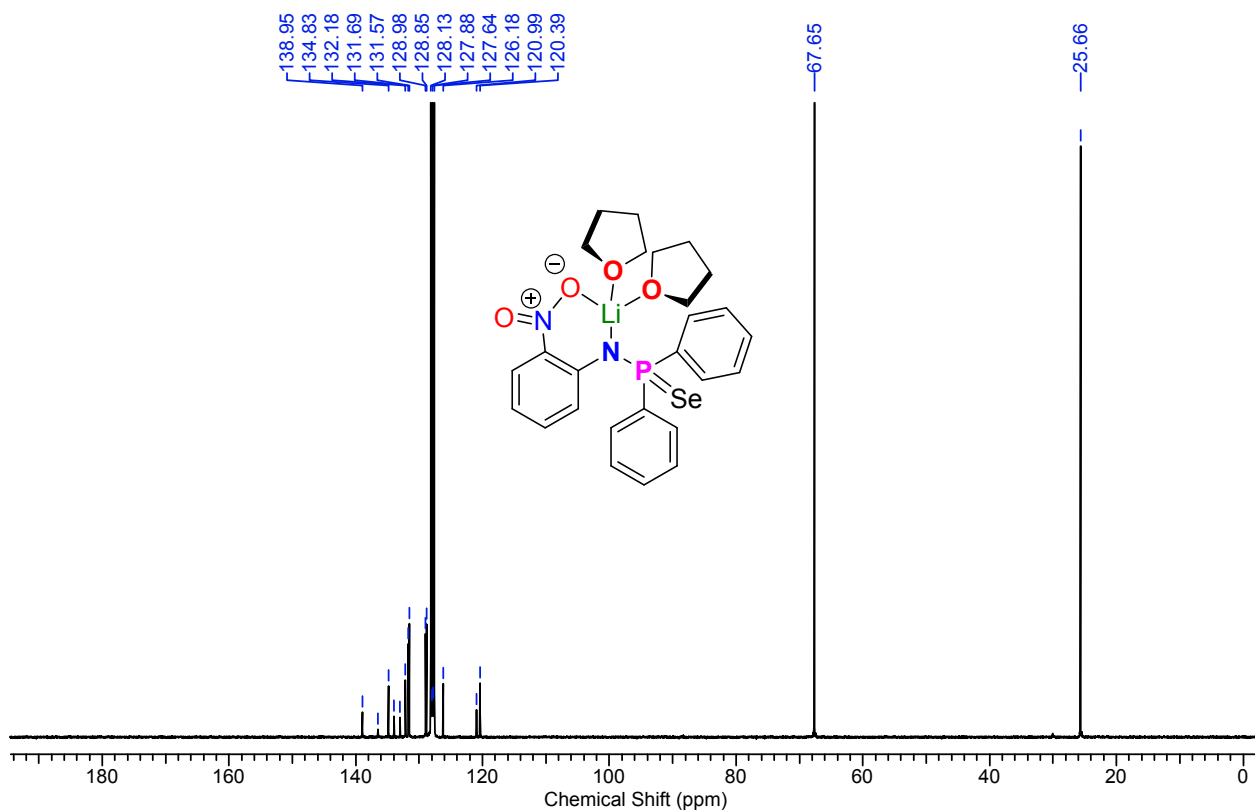

**Figure FS16:**  $^{13}\text{C}$  NMR spectra of complex **3b**.

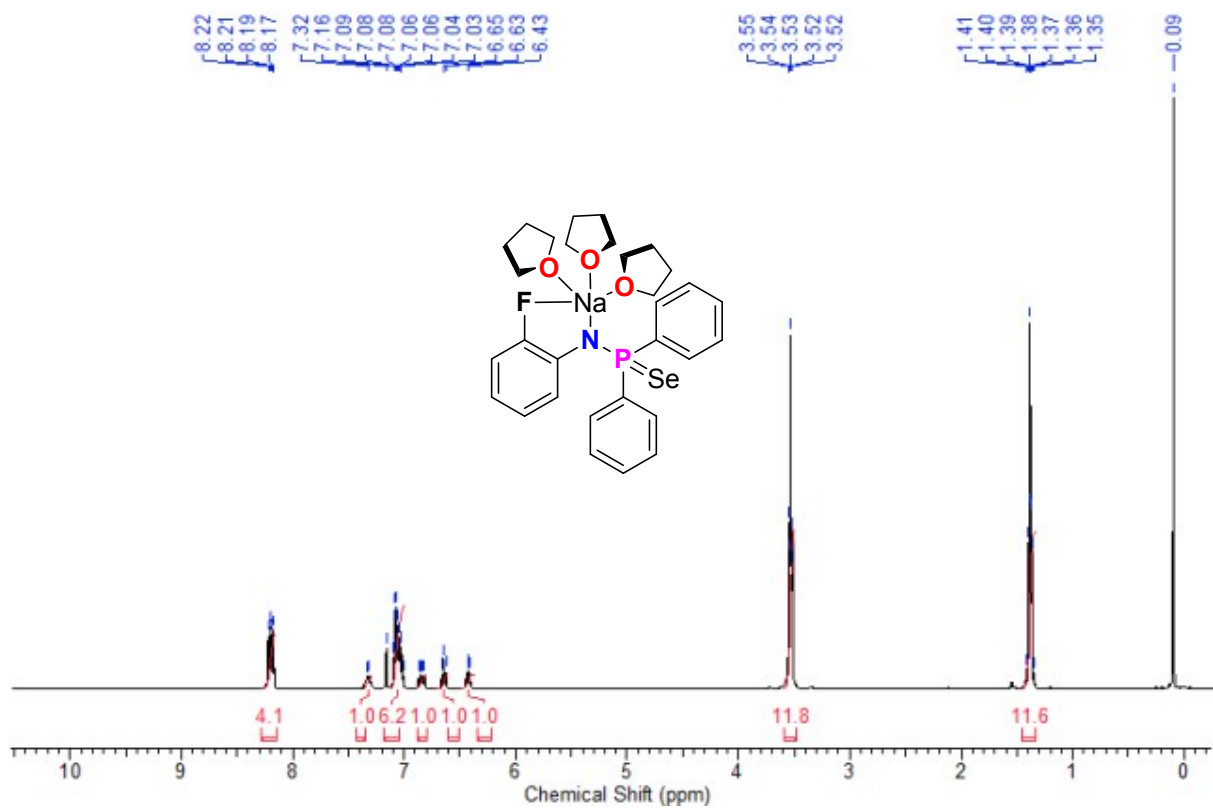

Figure FS17:  $^1\text{H}$  NMR spectra of complex 4a.

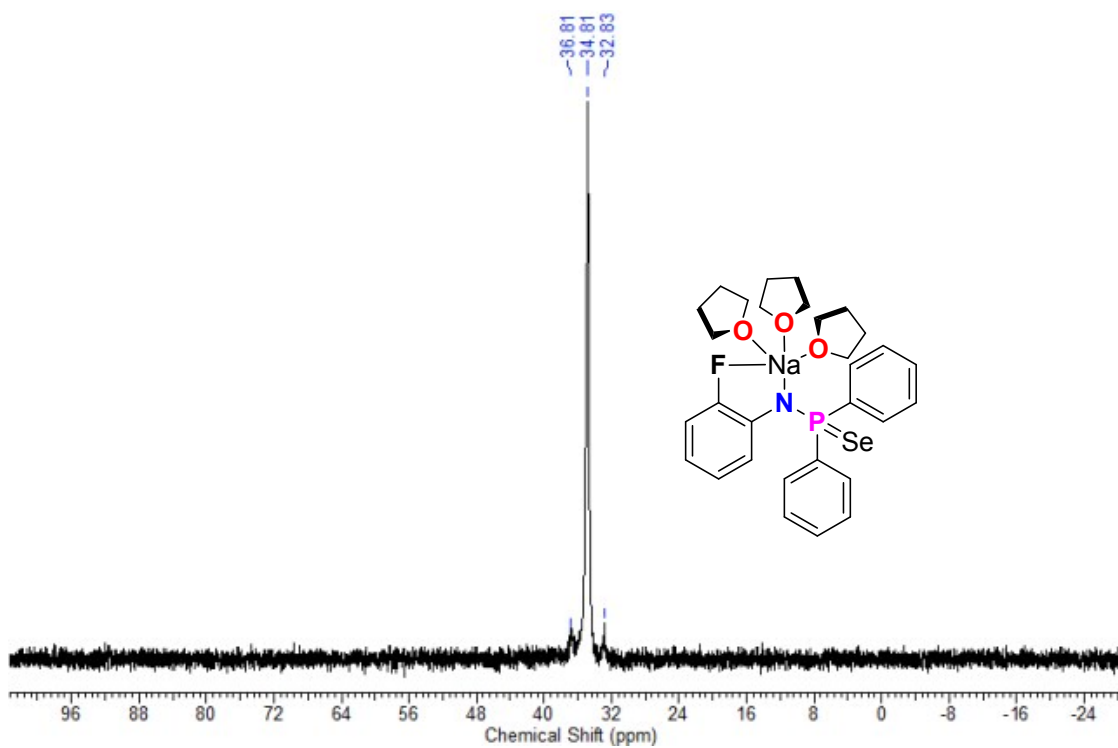

**Figure FS18:**  $^{31}\text{P}$  NMR spectra of complex 4a.

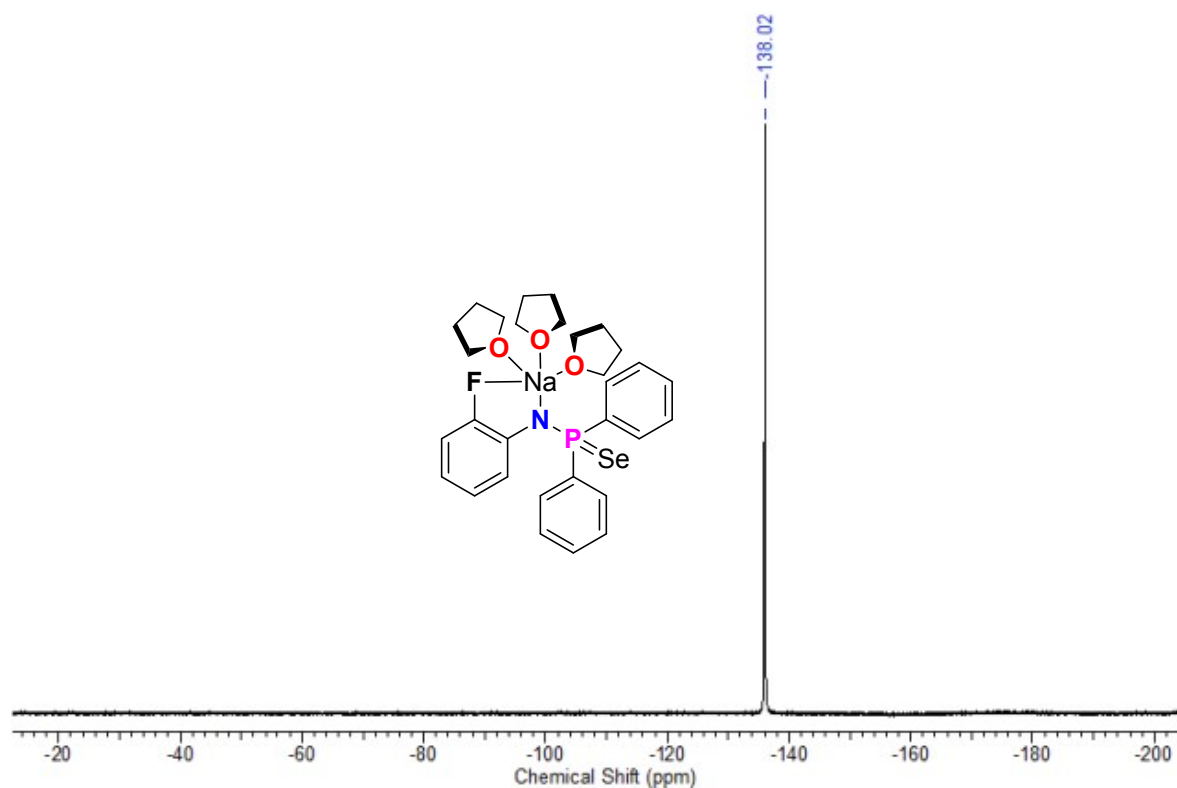

**Figure FS19:**  $^{19}\text{F}$  NMR spectra of complex 4a.

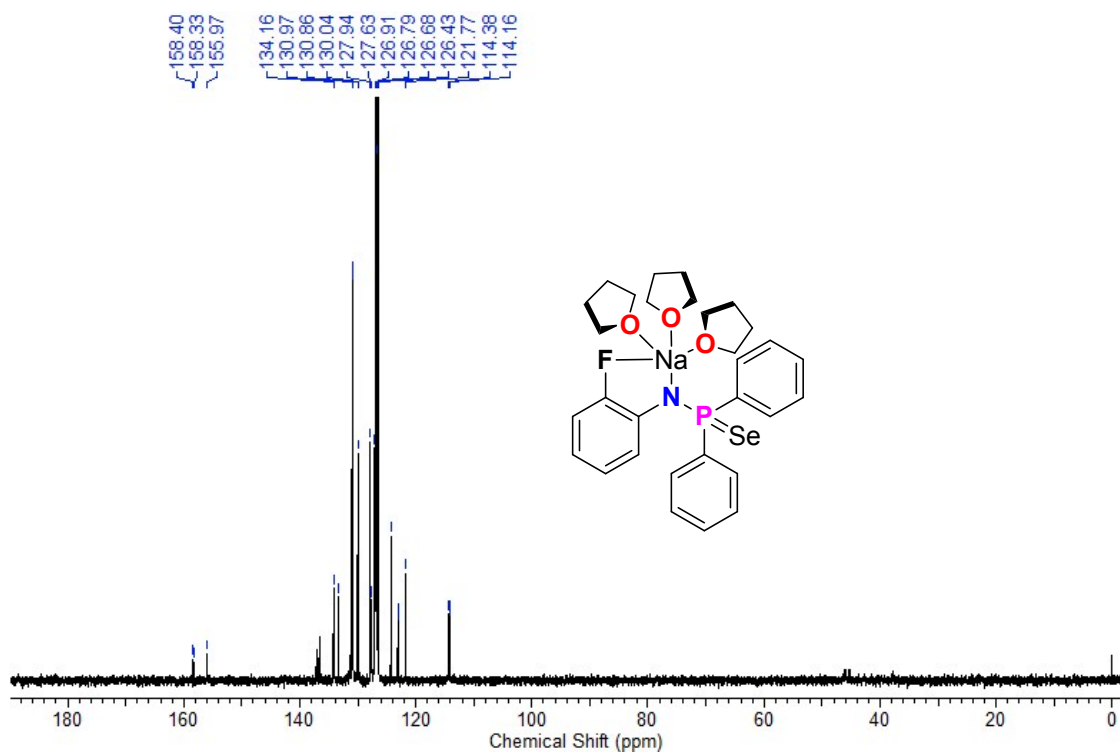

**Figure FS20:**  $^{13}\text{C}$  NMR spectra of complex **4a**.

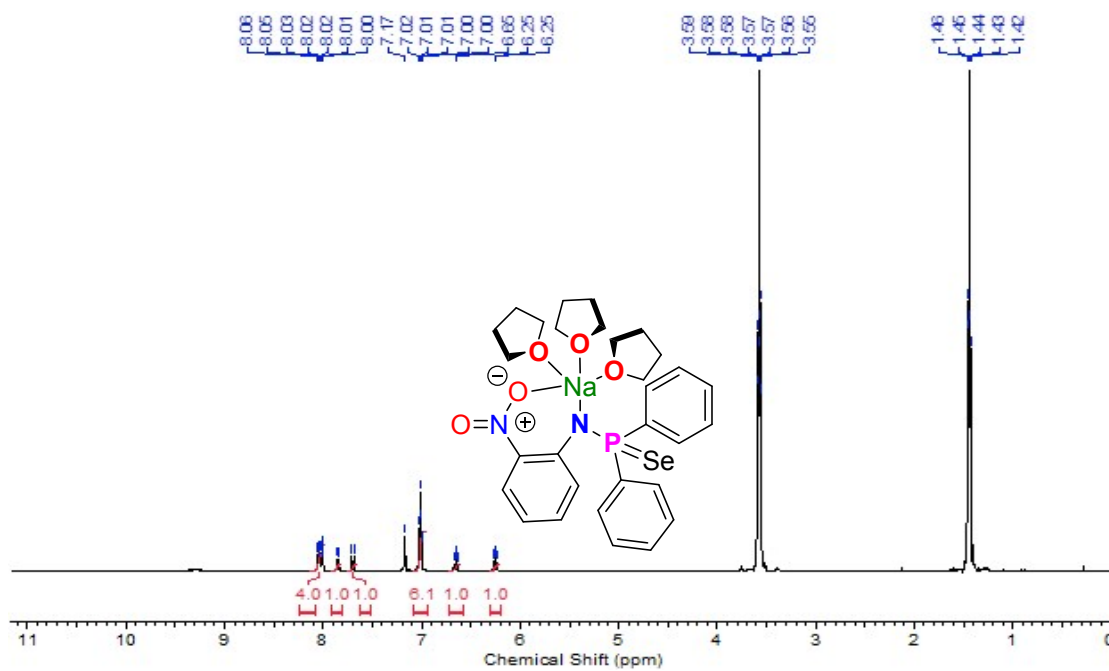

**Figure FS21:**  $^1\text{H}$  NMR spectra of complex **4b**.

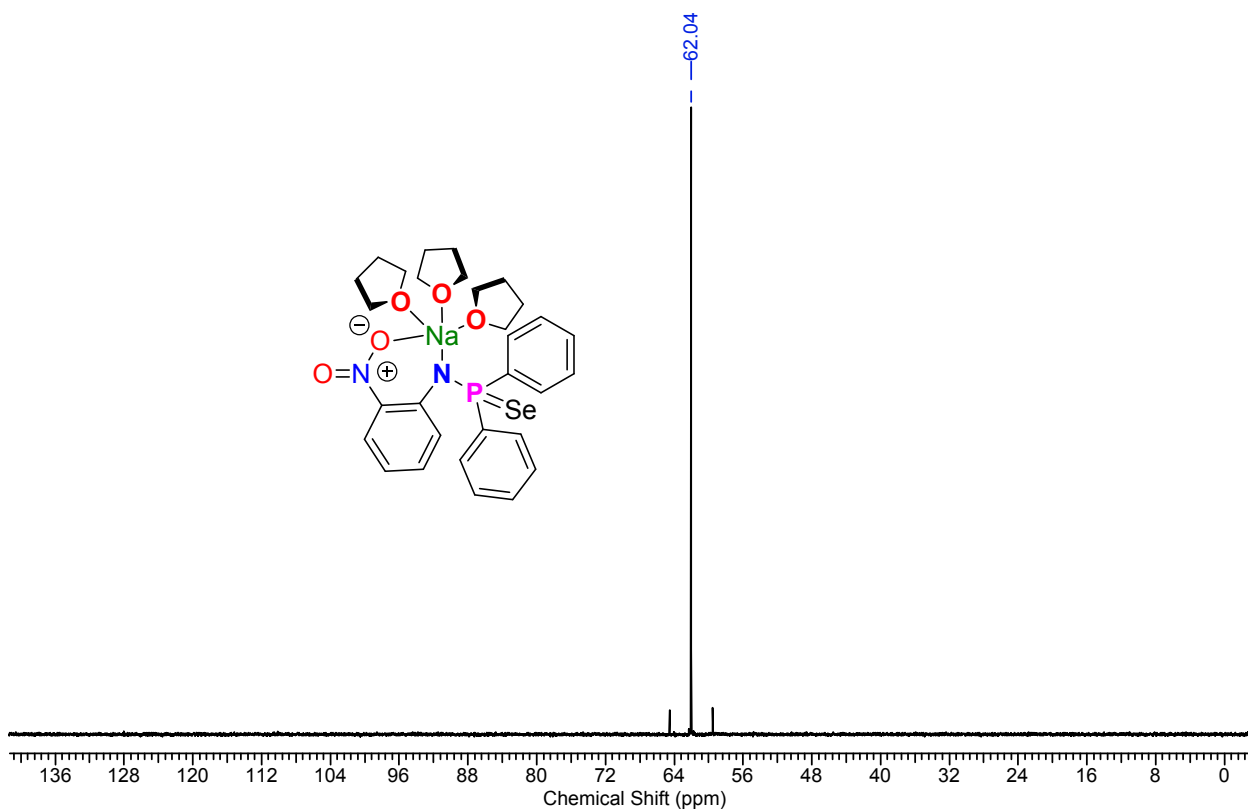

**Figure FS22:**  $^{19}\text{F}$  NMR spectra of complex **4b**.

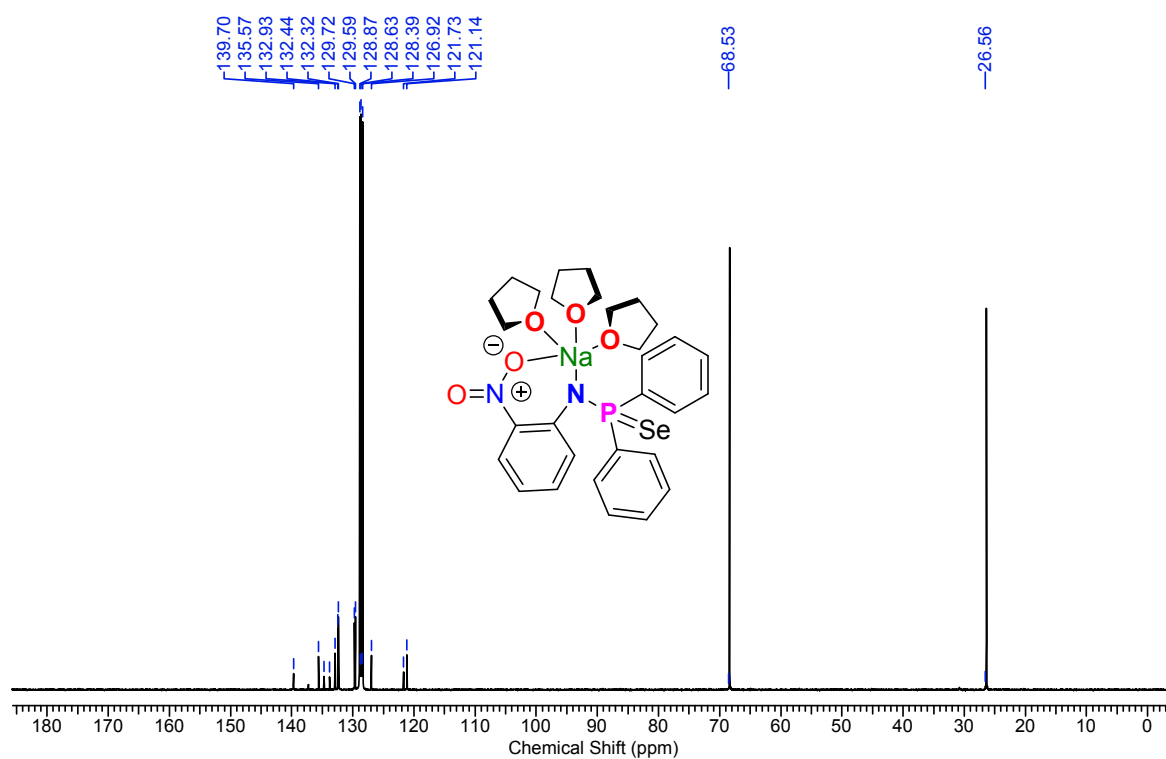

Figure FS23:  $^{13}\text{C}$  NMR spectra of complex 4b.

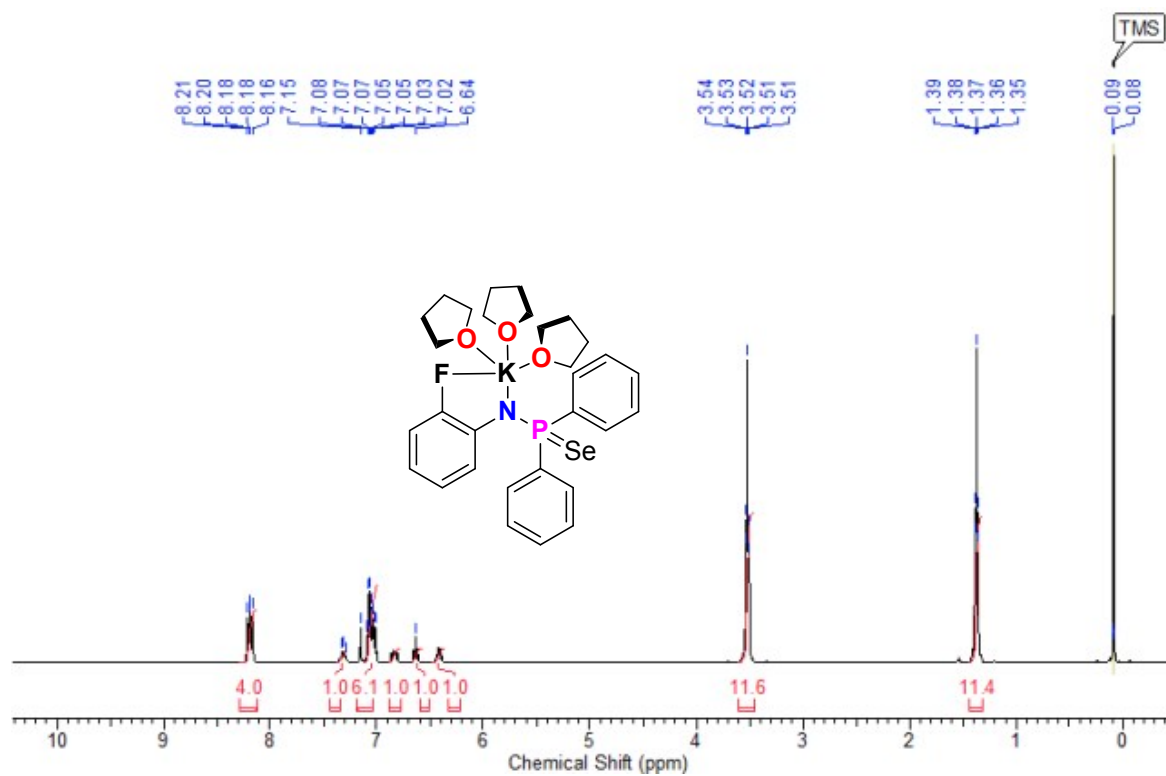

Figure FS24:  $^1\text{H}$  NMR spectra of complex **5a**.

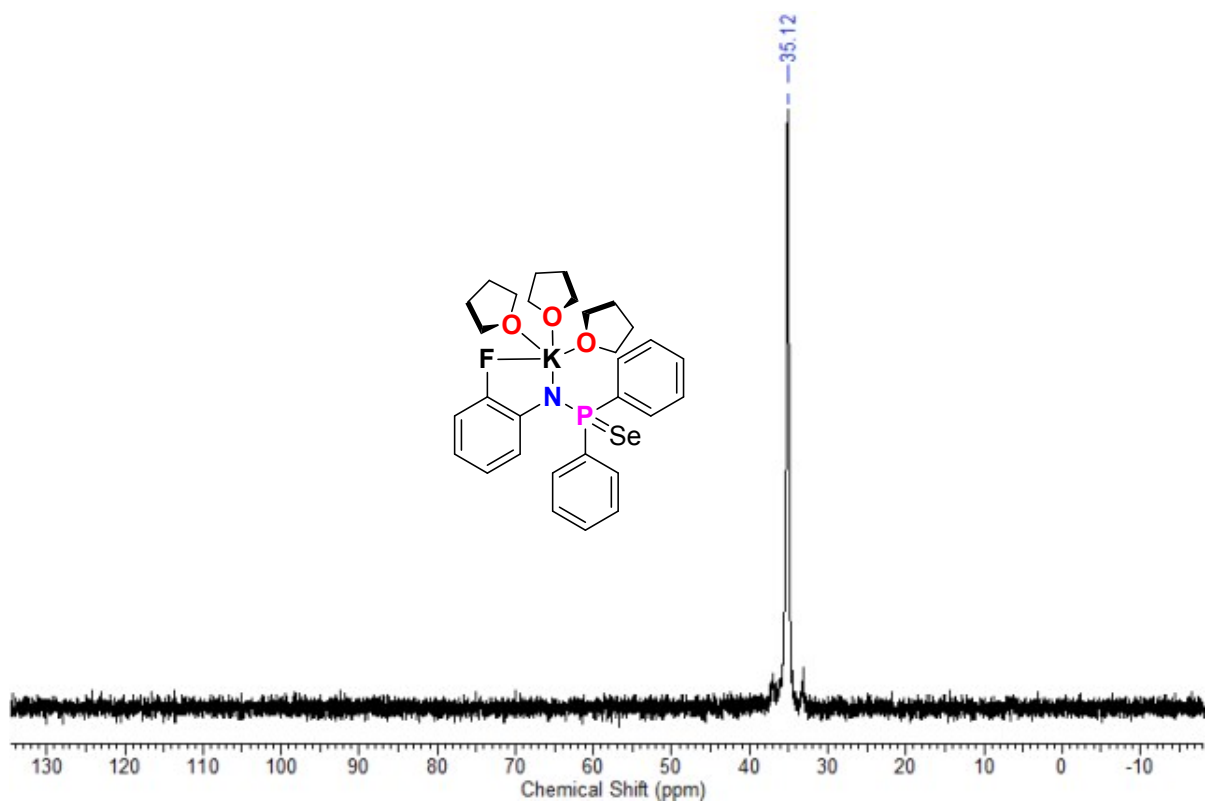

Figure FS25:  $^{31}\text{P}$  NMR spectra of complex **5a**.

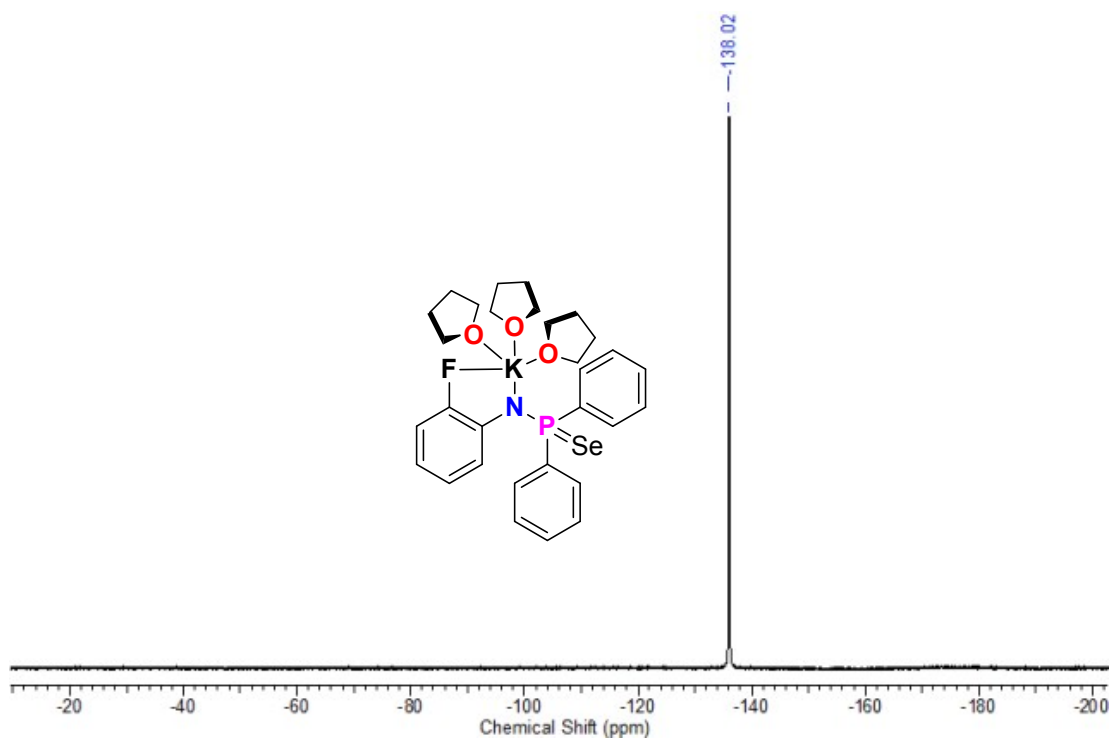



**Figure FS26:**  $^{19}\text{F}$  NMR spectra of complex **5a**.

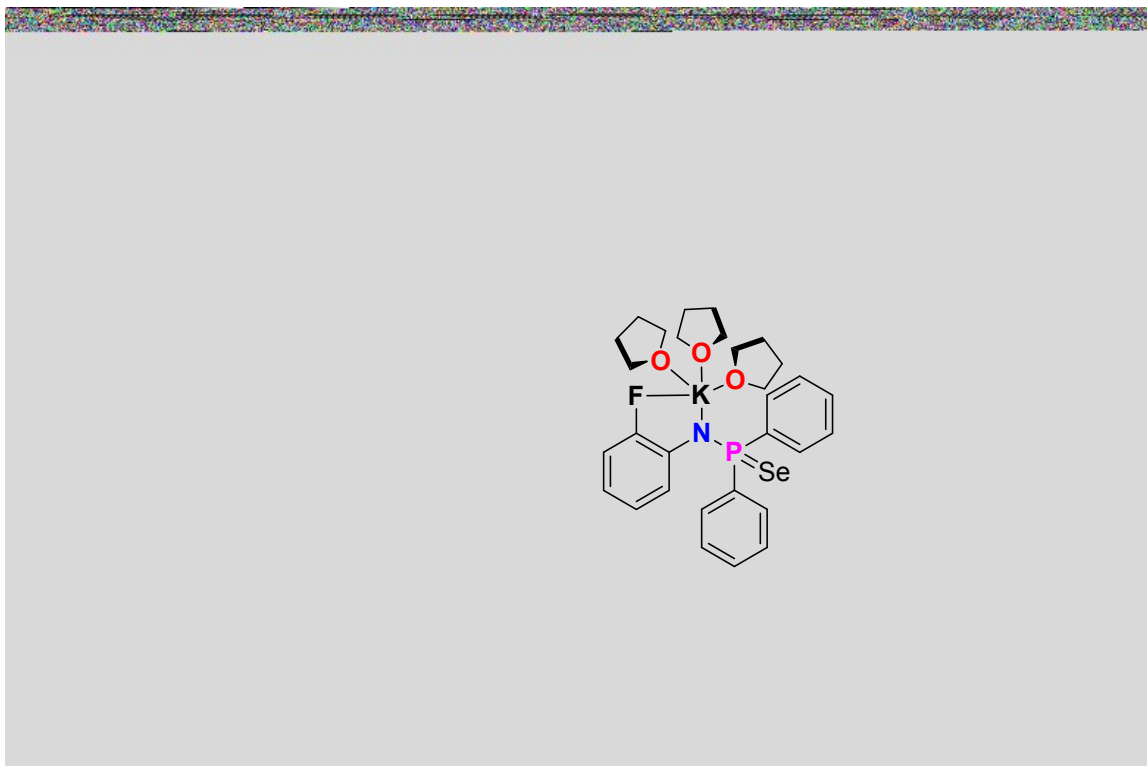

**Figure FS27:**  $^{13}\text{C}$  NMR spectra of complex **5a**.

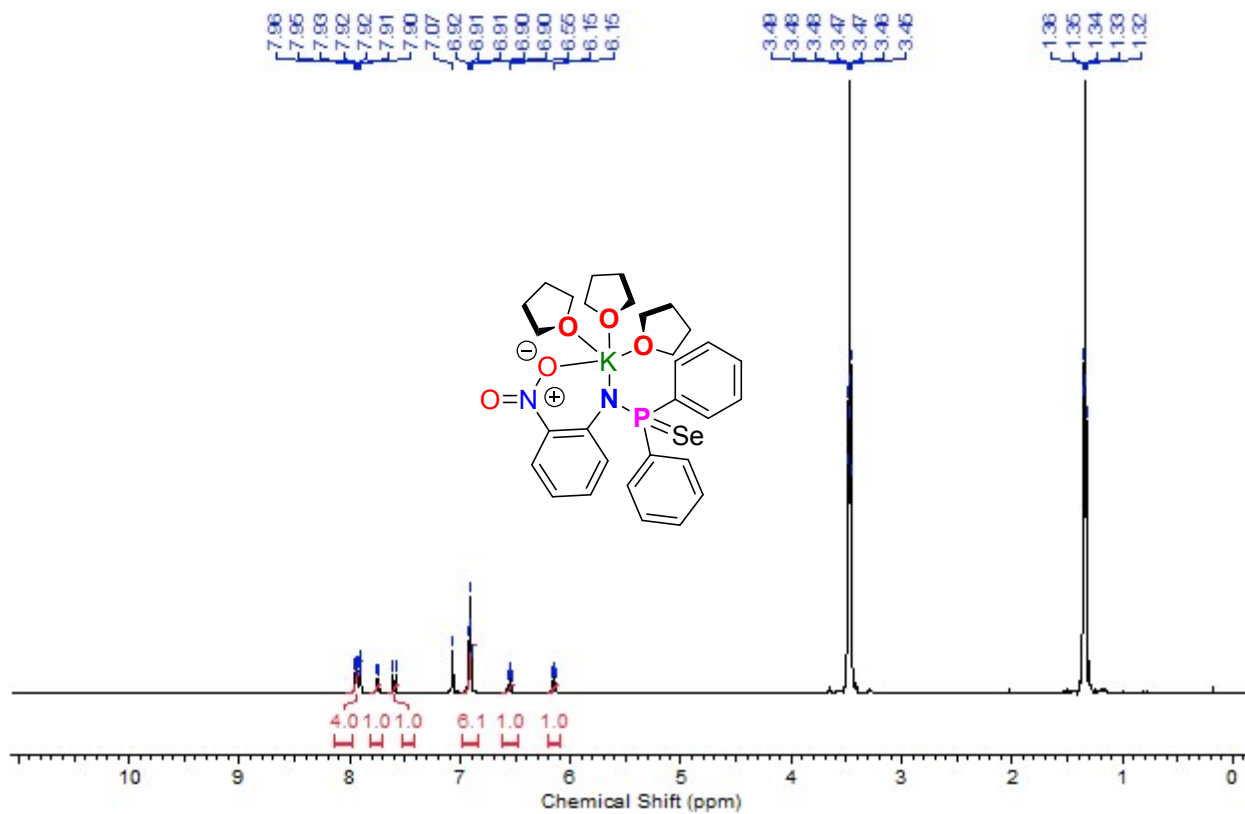

**Figure FS28:**  $^1\text{H}$  NMR spectra of complex **5b**.

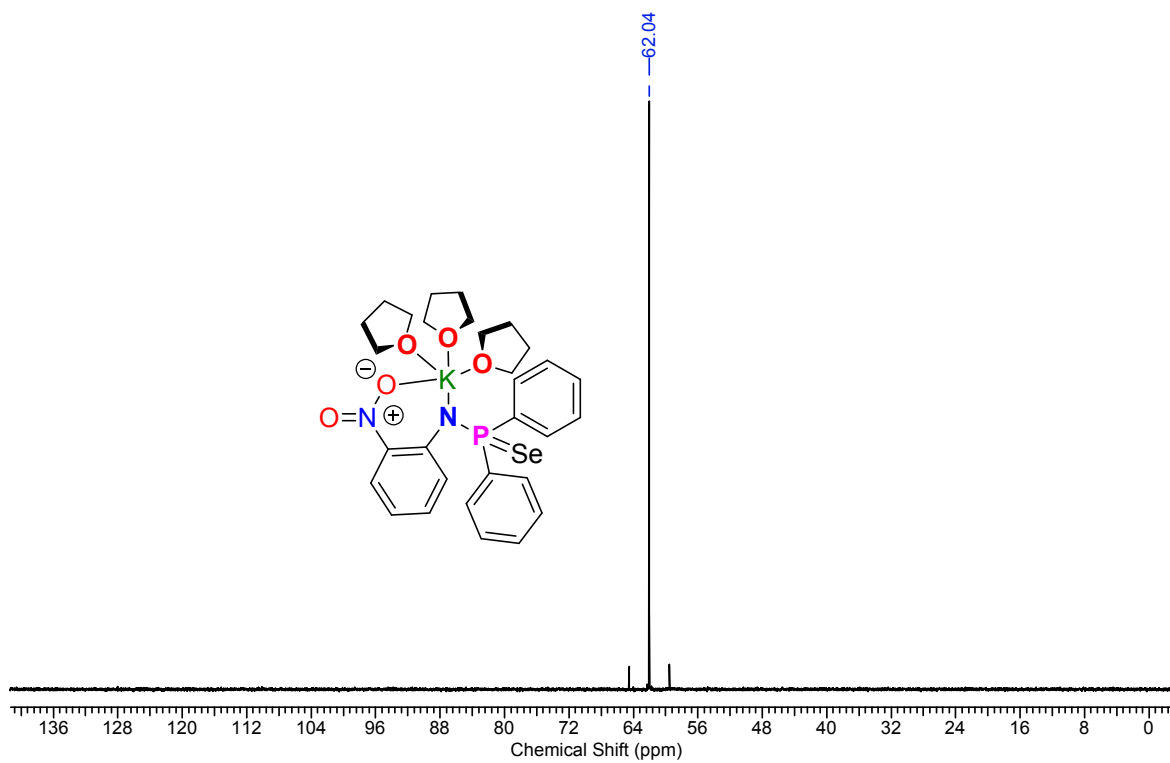

**Figure FS29:**  $^{31}\text{P}$  NMR spectra of complex **5b**.

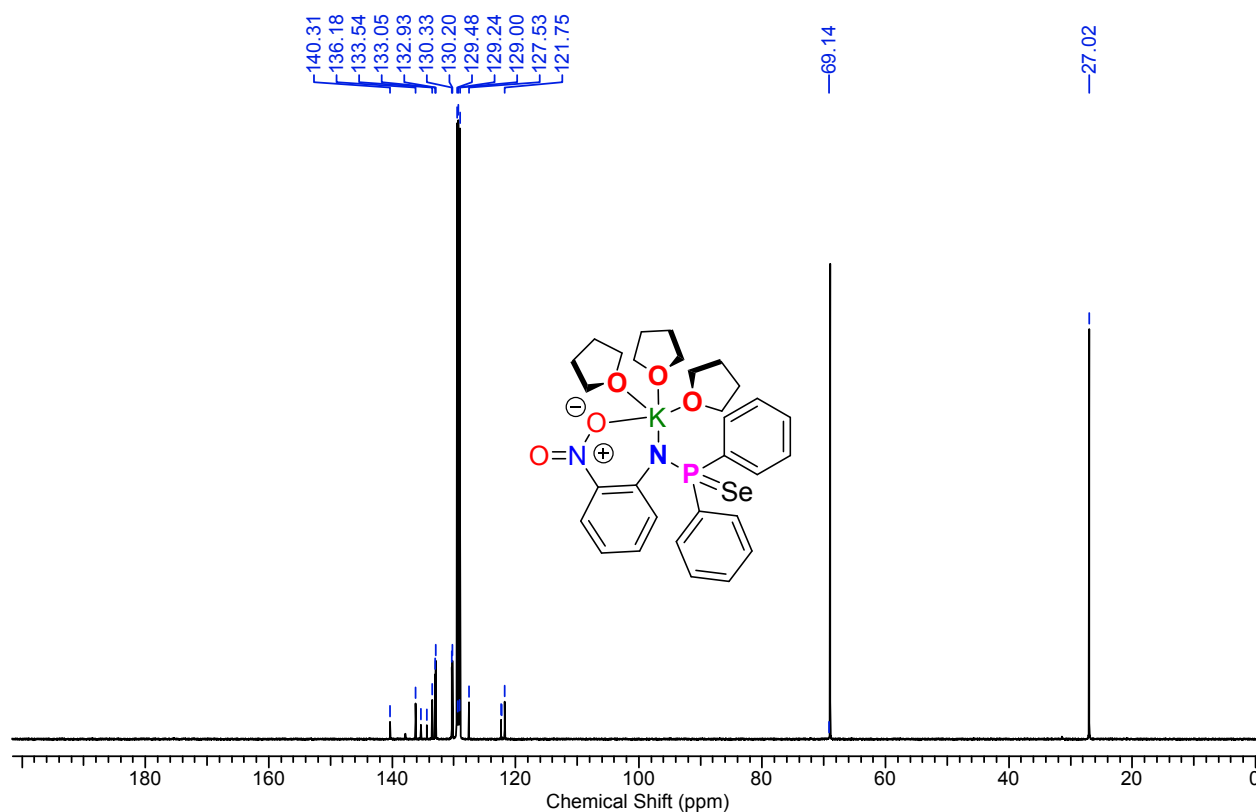

**Figure FS30:**  $^{13}\text{C}$  NMR spectra of complex **5b**

### *rac*-LA Polymerization Kinetics Data

#### Typical polymerization of *rac*-lactide.

*rac*-LA (0.288 g, 2.0 mmol) was added to a solution of **4a,b-5a,b** (0.02 mmol) in toluene (1 mL, Table 1 entry 6). After the solution was stirred at room temperature for 30 min to 2 hour depends on nature of initiator, the reaction was then quenched by the addition of a drop of 2(N) HCl and methanol. Then the solution was concentrated under vacuum, and the polymer was recrystallized from dichloromethane and hexane. The final polymer was then dried under vacuum to constant weight.

#### Details of the Kinetics Study for *rac*-LA Polymerization

##### [K(THF)<sub>3</sub>(Ph<sub>2</sub>P(Se)N(2-(F)-C<sub>4</sub>H<sub>4</sub>))] (**5a**) as a catalyst.

A typical kinetics study was conducted to establish the reaction order with respect to monomer and [K(THF)<sub>3</sub>(Ph<sub>2</sub>P(Se)N(2-(F)-C<sub>4</sub>H<sub>4</sub>))] (**5a**) as catalyst. For LA polymerization, *rac*-LA (0.228 g, 2.0 mmol) was added to a solution of **5a** (0.01, 0.02, 0.03, 0.04, 0.05 M) in CDCl<sub>3</sub> (1 mL), respectively. The solution was set in the NMR tube at 25°C. At the indicated time intervals; the tube was analyzed by <sup>1</sup>H NMR. The *rac*-LA concentration [LA] was determined by integrating the quartet methine peak of LA at 5.01 ppm and broad singlet methine peak at 5.09-5.20 ppm. As expected, plots of [LA]<sub>0</sub>/[LA] vs. time for a wide range of **5a** are linear indicating the usual first order dependence on monomer concentration (Figure FS31). Thus, the rate expression can be written as  $-d[\text{LA}]/dt = K_{\text{kpp}}[\text{La}]^1[\text{K}(\text{THF})_3(\text{Ph}_2\text{P}-(\text{Se})\text{N}(2-(\text{F})-\text{C}_4\text{H}_4))]^x = k[\text{LA}]^1$ ,

where  $k_{obs} = k_{app}[K(THF)_3(Ph_2P-(Se)N(2-(F)-C_4H_4))]^x$ . A plot of  $\ln(k_{obs})$  vs.  $\ln[K(THF)_3(Ph_2P-(Se)N(2-(F)-C_4H_4))]$  (Figure FS32, Table TS2) is linear, indicating the order of  $[K(THF)_3(Ph_2P-(Se)N(2-(F)-C_4H_4))]$  is ( $x = 0.95$  or 1) and  $k_{app}$  which is  $0.882 \text{ M}^{-1}\text{m}^{-1}$ . ( $\ln k_{app} = -0.126$ ).

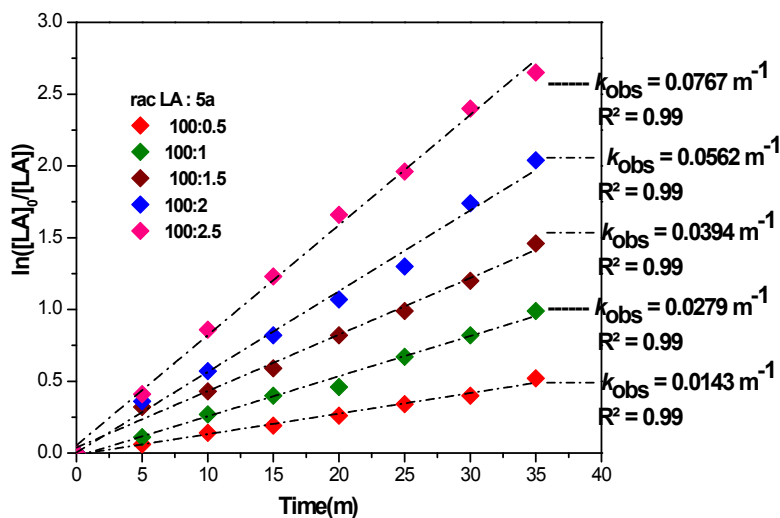

**Figure FS31.** First order kinetics plots for *rac* LA polymerizations with time in  $CDCl_3$  (1 mL) with different concentration of  $[K(THF)_3(Ph_2P-(Se)N(2-(F)-C_4H_4))]$  (**5a**) at  $25^\circ C$ .

**Table TS2.** Kinetics plots of  $\ln k_{obs}$  vs  $\ln[K(THF)_3(Ph_2P-(Se)N(2-(F)-C_4H_4))] / \ln(\mathbf{5a})$  for the polymerization of *rac*-LA with  $[LA] = 2.0 \text{ M}$  in  $CDCl_3$  (1 mL) at  $25^\circ C$ .

| S.NO. | $[K(THF)_3(Ph_2P-(Se)N(2-(F)-C_4H_4))]$ ( <b>5a</b> ) (M) | $\ln k_{obs}$ ( $Mm^{-1}$ ) |
|-------|-----------------------------------------------------------|-----------------------------|
| 1     | -4.6                                                      | -4.25                       |
| 2     | -3.912                                                    | -3.57                       |
| 3     | -3.506                                                    | -3.23                       |
| 4     | -3.218                                                    | -2.88                       |
| 5     | -2.813                                                    | -2.57                       |

**Table TS3.** Kinetics plots of  $k_{obs}$  vs  $[K(THF)_3(Ph_2P-(Se)N(2-(F)-C_4H_4))]$  (**5a**) for the polymerization of *rac*-LA with  $[LA] = 2.0 \text{ M}$  in  $CDCl_3$  (1 mL) at  $25^\circ C$ .

| S. NO. | $[K(THF)_3(Ph_2P-(Se)N(2-(F)-C_4H_4))]$ ( <b>5a</b> ) (M) | $k_{obs}$ ( $Mm^{-1}$ ) |
|--------|-----------------------------------------------------------|-------------------------|
|--------|-----------------------------------------------------------|-------------------------|

|   |      |        |
|---|------|--------|
| 1 | 0    | 0      |
| 2 | 0.01 | 0.0143 |
| 3 | 0.02 | 0.0279 |
| 4 | 0.03 | 0.0394 |
| 5 | 0.04 | 0.0562 |
| 6 | 0.05 | 0.0767 |

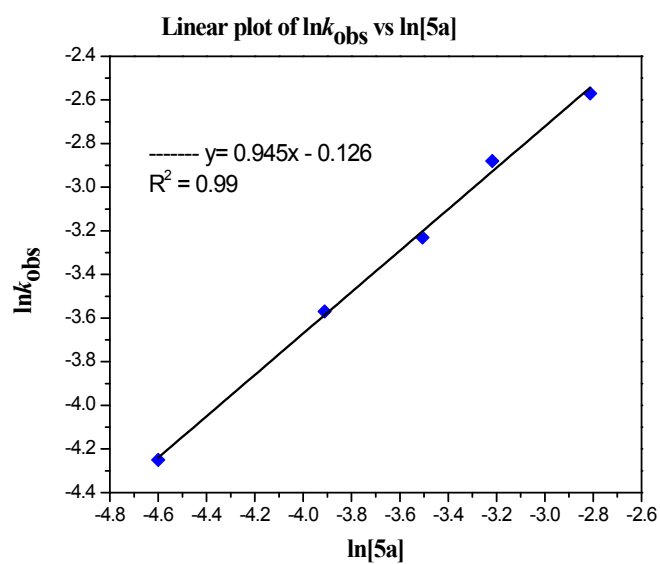

**Figure FS32.** Kinetics plots of  $\ln k_{obs}$  vs  $\ln[\text{K}(\text{THF})_3(\text{Ph}_2\text{P}-(\text{Se})\text{N}(2-(\text{F})-\text{C}_4\text{H}_4))] / \ln (5a)$  for the polymerization of *rac*-LA with  $[\text{LA}] = 2.0 \text{ M}$  in  $\text{CDCl}_3$  (1 mL) at  $25^\circ\text{C}$ .

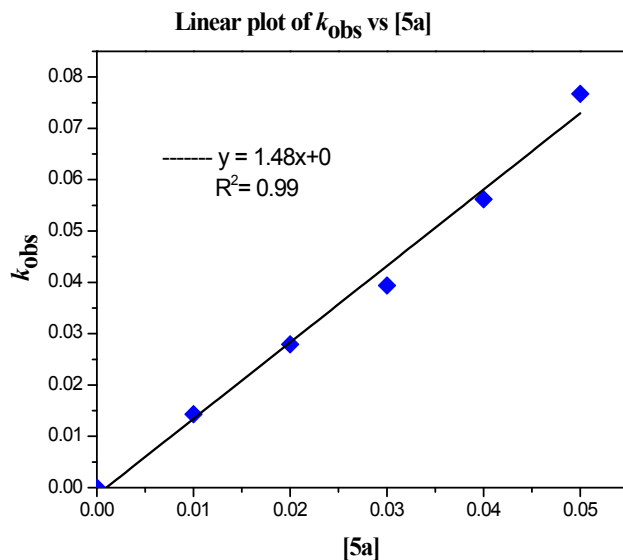

**Figure FS33.** Kinetics plots of  $k_{obs}$  vs  $[\text{K}(\text{THF})_3(\text{Ph}_2\text{P}-(\text{Se})\text{N}(2-(\text{F})-\text{C}_4\text{H}_4))]$  (**5a**) for the polymerization of rac-LA with  $[\text{LA}] = 2.0 \text{ M}$  in  $\text{CDCl}_3$  (1 mL) at  $25^\circ\text{C}$ .

$$\text{Rate of the reaction} = -d[\text{LA}]/dt = 0.882 [\text{LA}]^1 [\text{K}(\text{THF})_3(\text{Ph}_2\text{P}-(\text{Se})\text{N}(2-(\text{F})-\text{C}_4\text{H}_4))]^1$$

**$[\text{K}(\text{THF})_3(\text{Ph}_2\text{P}-(\text{Se})\text{N}(2-(\text{NO}_2)-\text{C}_4\text{H}_4))]$  (**5b**) as a catalyst.**

A typical kinetics study was conducted to establish the reaction order with respect to monomer and  $[\text{K}(\text{THF})_3(\text{Ph}_2\text{P}-(\text{Se})\text{N}(2-(\text{NO}_2)-\text{C}_4\text{H}_4))]$  (**5b**) as catalyst. For LA polymerization, rac-LA (0.228 g, 2.0 mmol) was added to a solution of **5b** (0.01, 0.02, 0.03, 0.04, 0.05 M) in  $\text{CDCl}_3$  (1 mL), respectively. The solution was set in the NMR tube at  $25^\circ\text{C}$ . At the indicated time intervals; the tube was analyzed by  $^1\text{H}$  NMR. The rac-LA concentration  $[\text{LA}]$  was determined by integrating the quartet methine peak of LA at 5.01 ppm and broad singlet methine peak at 5.09-5.20 ppm. As expected, plots of  $[\text{LA}]_0/[\text{LA}]$  vs. time for a wide range of **5b** are linear indicating the usual first order dependence on monomer concentration (Figure FS34). Thus, the rate expression can be written as  $-d[\text{LA}]/dt = K_{kpp}[\text{La}]^1 [\text{K}(\text{THF})_3(\text{Ph}_2\text{P}-(\text{Se})\text{N}(2-(\text{NO}_2)-\text{C}_4\text{H}_4))]^x = k[\text{LA}]^1$ , where  $k_{obs} = k_{app}[\text{K}(\text{THF})_3(\text{Ph}_2\text{P}-(\text{Se})\text{N}(2-(\text{NO}_2)-\text{C}_4\text{H}_4))]^x$ . A plot of  $\ln(k_{obs})$  vs.  $\ln[\text{K}(\text{THF})_3(\text{Ph}_2\text{P}-(\text{Se})\text{N}(2-(\text{NO}_2)-\text{C}_4\text{H}_4))]$  (Figure FS35, Table TS4) is linear, indicating the order of  $[\text{K}(\text{THF})_3(\text{Ph}_2\text{P}-(\text{Se})\text{N}(2-(\text{NO}_2)-\text{C}_4\text{H}_4))]$  is ( $x = 0.82$  or 1) and  $k_{app}$  which is  $0.755 \text{ M}^{-1}\text{m}^{-1}$ . ( $\ln k_{app} = -0.28$ ).

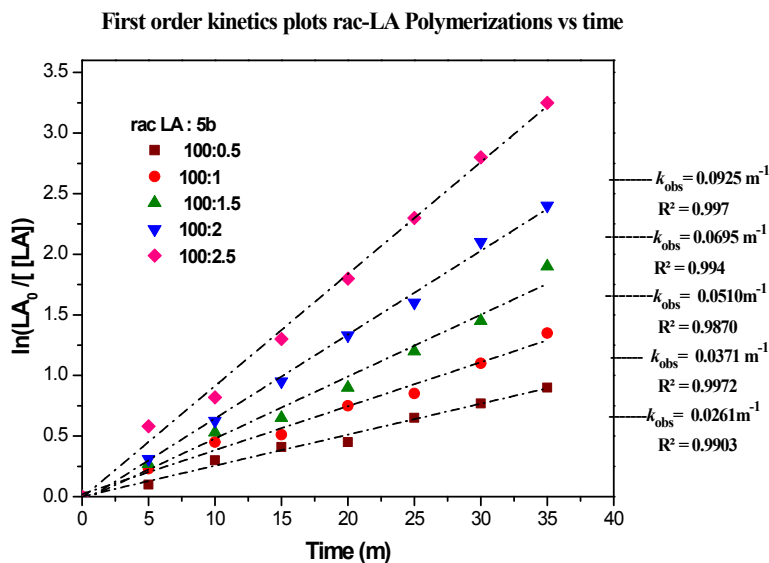

**Figure FS34.** First order kinetics plots for rac LA polymerizations with time in  $\text{CDCl}_3$  (1 mL) with different concentration of  $[\text{K}(\text{THF})_3(\text{Ph}_2\text{P}-(\text{Se})\text{N}(2-(\text{NO}_2)-\text{C}_4\text{H}_4)]$  (**5b**) at  $25^\circ\text{C}$ .

**Table TS4.** Kinetics plots of  $\ln k_{obs}$  vs  $\ln[\text{K}(\text{THF})_3(\text{Ph}_2\text{P}-(\text{Se})\text{N}(2-(\text{NO}_2)-\text{C}_4\text{H}_4)]/\ln(\mathbf{5b})$  for the polymerization of *rac*-LA with  $[\text{LA}] = 2.0$  M in  $\text{CDCl}_3$  (1 mL) at  $25^\circ\text{C}$ .

| S.NO. | $\ln[\text{K}(\text{THF})_3(\text{Ph}_2\text{P}-(\text{Se})\text{N}(2-(\text{NO}_2)-\text{C}_4\text{H}_4)]$ ( <b>5b</b> ) (M) | $\ln k_{obs}$ ( $\text{Mm}^{-1}$ ) |
|-------|-------------------------------------------------------------------------------------------------------------------------------|------------------------------------|
| 1     | -4.6                                                                                                                          | -3.66                              |
| 2     | -3.912                                                                                                                        | -3.32                              |
| 3     | -3.506                                                                                                                        | -2.97                              |
| 4     | -3.218                                                                                                                        | -2.67                              |
| 5     | -2.813                                                                                                                        | -2.38                              |

**Table TS5.** Kinetics plots of  $k_{obs}$  vs  $[\text{K}(\text{THF})_3(\text{Ph}_2\text{P}-(\text{Se})\text{N}(2-(\text{NO}_2)-\text{C}_4\text{H}_4)]$  (**5b**) for the polymerization of *rac*-LA with  $[\text{LA}] = 2.0$  M in  $\text{CDCl}_3$  (1 mL) at  $25^\circ\text{C}$ .

| S. NO. | $[\text{K}(\text{THF})_3(\text{Ph}_2\text{P}-(\text{Se})\text{N}(2-(\text{NO}_2)-\text{C}_4\text{H}_4)]$ ( <b>5b</b> ) (M) | $k_{obs}$ ( $\text{Mm}^{-1}$ ) |
|--------|----------------------------------------------------------------------------------------------------------------------------|--------------------------------|
| 1      | 0                                                                                                                          | 0                              |
| 2      | 0.01                                                                                                                       | 0.0256                         |
| 3      | 0.02                                                                                                                       | 0.036                          |

|   |      |       |
|---|------|-------|
| 4 | 0.03 | 0.051 |
| 5 | 0.04 | 0.069 |
| 6 | 0.05 | 0.092 |

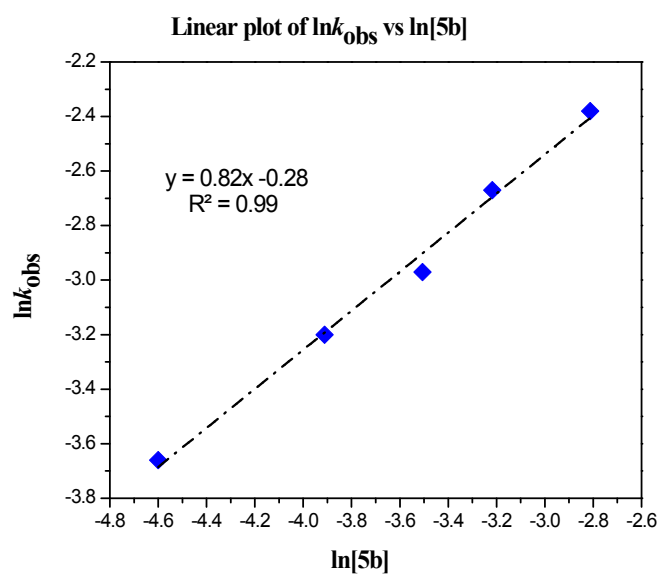

**Figure FS35.** Kinetics plots of  $\ln k_{obs}$  vs  $\ln[\text{K}(\text{THF})_3(\text{Ph}_2\text{P}(\text{Se})\text{N}(2\text{-(NO}_2\text{)-C}_4\text{H}_4)] / \ln(5b)$  for the polymerization of *rac*-LA with  $[\text{LA}] = 2.0 \text{ M}$  in  $\text{CDCl}_3$  (1 mL) at  $25^\circ\text{C}$ .

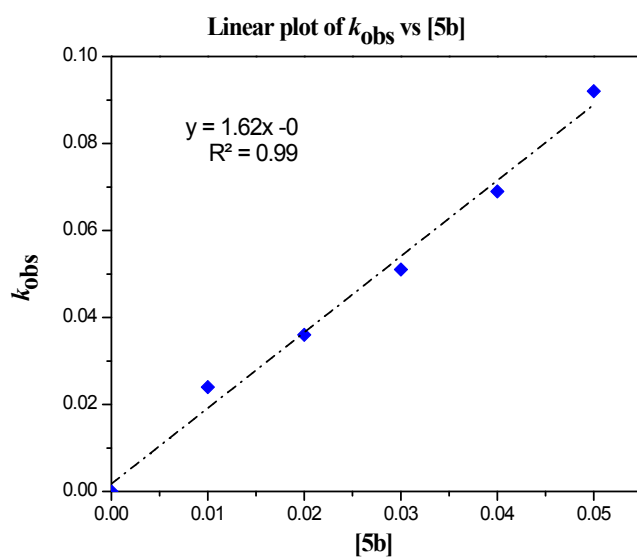



**Figure FS36.** Kinetics plots of  $k_{obs}$  vs  $[K(THF)_3(Ph_2P-(Se)N(2-(NO_2)-C_4H_4)]$  (**5b**) for the polymerization of *rac*-LA with  $[LA] = 2.0$  M in  $CDCl_3$  (1 mL) at  $25^\circ C$ .

$$\text{Rate of the reaction} = -d[LA]/dt = 0.755 [LA]^1 [K(THF)_3(Ph_2P-(Se)N(2-(NO_2)-C_4H_4)]^1.$$

**[Na(THF)<sub>3</sub>(Ph<sub>2</sub>P-(Se)N(2-(F)-C<sub>4</sub>H<sub>4</sub>)]** (**4a**) as a catalyst.

A typical kinetics study was conducted to establish the reaction order with respect to monomer and  $[Na(THF)_3(Ph_2P-(Se)N(2-(F)-C_4H_4)]$  (**4a**) as catalyst. For LA polymerization, *rac*-LA (0.228 g, 2.0 mmol) was added to a solution of **4a** (0.01, 0.02, 0.03, 0.04, 0.05 M) in  $CDCl_3$  (1 mL), respectively. The solution was set in the NMR tube at  $25^\circ C$ . At the indicated time intervals; the tube was analyzed by  $^1H$  NMR. The *rac*-LA concentration  $[LA]$  was determined by integrating the quartet methine peak of LA at 5.01 ppm and broad singlet methine peak at 5.09-5.20 ppm. As expected, plots of  $\ln([LA]_0/[LA])$  vs. time for a wide range of **4a** are linear indicating the usual first order dependence on monomer concentration (Figure FS37). Thus, the rate expression can be written as  $-d[LA]/dt = K_{kpp}[LA]^1 [Na(THF)_3(Ph_2P-(Se)N(2-(F)-C_4H_4)]^x = k[LA]^1$ , where  $k_{obs} = k_{app}[Na(THF)_3(Ph_2P-(Se)N(2-(F)-C_4H_4)]^x$ . A plot of  $\ln(k_{obs})$  vs.  $\ln[Na(THF)_3(Ph_2P-(Se)N(2-(F)-C_4H_4)]$  (Figure FS38, Table TS6) is linear, indicating the order of  $[Na(THF)_3(Ph_2P-(Se)N(2-(F)-C_4H_4)]$  is ( $x = 0.99$  or 1) and  $k_{app}$  which is  $0.619 M^{-1}m^{-1}$ . ( $\ln k_{app} = -0.479$ ).

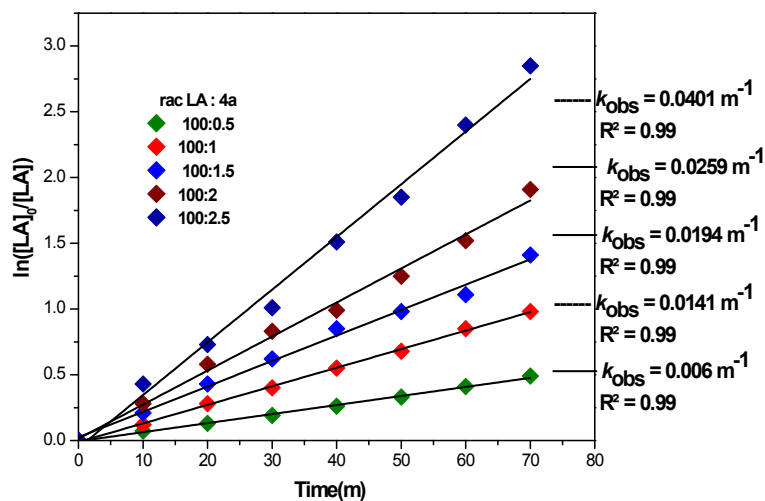

**Figure FS37.** First order kinetics plots for *rac* LA polymerizations with time in  $CDCl_3$  (1 mL) with different concentration of  $[Na(THF)_3(Ph_2P-(Se)N(2-(F)-C_4H_4)]$  (**4a**) at  $25^\circ C$ .

**Table TS6.** Kinetics plots of  $\ln k_{obs}$  vs  $\ln[Na(THF)_3(Ph_2P-(Se)N(2-(F)-C_4H_4)] / \ln(4a)$  for the polymerization of *rac*-LA with  $[LA] = 2.0$  M in  $CDCl_3$  (1 mL) at  $25^\circ C$ .

| S.NO. | $[Na(THF)_3(Ph_2P-(Se)N(2-(F)-C_4H_4)]$ ( <b>4a</b> ) (M) | $\ln k_{obs}$ (Mm <sup>-1</sup> ) |
|-------|-----------------------------------------------------------|-----------------------------------|
| 1     | -4.6                                                      | -5.12                             |

|   |        |       |
|---|--------|-------|
| 2 | -3.912 | -4.26 |
| 3 | -3.506 | -3.94 |
| 4 | -3.218 | -3.65 |
| 5 | -2.813 | -3.34 |

**Table TS7.** Kinetics plots of  $k_{obs}$  vs  $[\text{Na}(\text{THF})_3(\text{Ph}_2\text{P}-(\text{Se})\text{N}(2-(\text{F})-\text{C}_4\text{H}_4))]$  (**4a**) for the polymerization of *rac*-LA with  $[\text{LA}] = 2.0 \text{ M}$  in  $\text{CDCl}_3$  (1 mL) at  $25^\circ\text{C}$ .

| S. NO. | $[\text{Na}(\text{THF})_3(\text{Ph}_2\text{P}-(\text{Se})\text{N}(2-(\text{F})-\text{C}_4\text{H}_4))]$ ( <b>4a</b> ) (M) | $k_{obs}$ ( $\text{Mm}^{-1}$ ) |
|--------|---------------------------------------------------------------------------------------------------------------------------|--------------------------------|
| 1      | 0                                                                                                                         | 0                              |
| 2      | 0.01                                                                                                                      | 0.006                          |
| 3      | 0.02                                                                                                                      | 0.0141                         |
| 4      | 0.03                                                                                                                      | 0.0194                         |
| 5      | 0.04                                                                                                                      | 0.0259                         |
| 6      | 0.05                                                                                                                      | 0.0351                         |

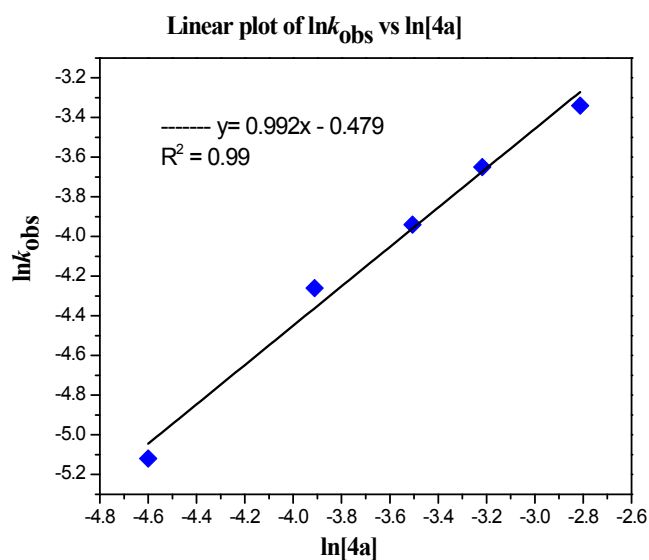

**Figure FS38.** Kinetics plots of  $\ln k_{obs}$  vs  $\ln[\text{K}(\text{THF})_3(\text{Ph}_2\text{P}-(\text{Se})\text{N}(2-(\text{F})-\text{C}_4\text{H}_4))]$  /  $\ln$  (**4a**) for the polymerization of *rac*-LA with  $[\text{LA}] = 2.0 \text{ M}$  in  $\text{CDCl}_3$  (1 mL) at  $25^\circ\text{C}$ .

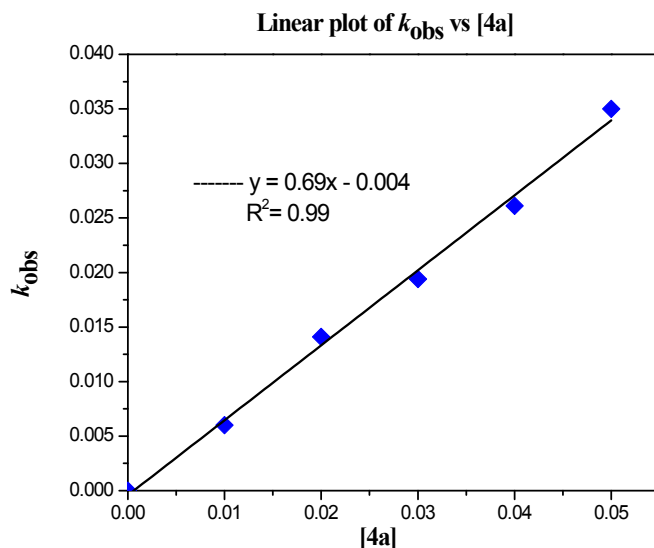

**Figure FS39.** Kinetics plots of  $k_{obs}$  vs  $[\text{Na}(\text{THF})_3(\text{Ph}_2\text{P}(\text{Se})\text{N}(2\text{-F})\text{-C}_4\text{H}_4)]$  (**4a**) for the polymerization of *rac*-LA with  $[\text{LA}] = 2.0 \text{ M}$  in  $\text{CDCl}_3$  (1 mL) at  $25^\circ\text{C}$ .

$$\text{Rate of the reaction} = -d[\text{LA}]/dt = 0.619 [\text{LA}]^1 [\text{Na}(\text{THF})_3(\text{Ph}_2\text{P}(\text{Se})\text{N}(2\text{-F})\text{-C}_4\text{H}_4)]^1.$$

**$[\text{Na}(\text{THF})_3(\text{Ph}_2\text{P}(\text{Se})\text{N}(2\text{-NO}_2)\text{-C}_4\text{H}_4)]$  (**4b**) as a catalyst.**

A typical kinetics study was conducted to establish the reaction order with respect to monomer and  $[\text{Na}(\text{THF})_3(\text{Ph}_2\text{P}(\text{Se})\text{N}(2\text{-NO}_2)\text{-C}_4\text{H}_4)]$  (**4b**) as catalyst. For LA polymerization, *rac*-LA (0.228 g, 2.0 mmol) was added to a solution of **4b** (0.01, 0.02, 0.03, 0.04, 0.05 M) in  $\text{CDCl}_3$  (1 mL), respectively. The solution was set in the NMR tube at  $25^\circ\text{C}$ . At the indicated time intervals; the tube was analyzed by  $^1\text{H}$  NMR. The *rac*-LA concentration  $[\text{LA}]$  was determined by integrating the quartet methine peak of LA at 5.01 ppm and broad singlet methine peak at 5.09-5.20 ppm. As expected, plots of  $[\text{LA}]_0/[\text{LA}]$  vs. time for a wide range of **4b** are linear indicating the usual first order dependence on monomer concentration (Figure FS40). Thus, the rate expression can be written as  $-d[\text{LA}]/dt = K_{kpp}[\text{La}]^1[\text{Na}(\text{THF})_3(\text{Ph}_2\text{P}(\text{Se})\text{N}(2\text{-NO}_2)\text{-C}_4\text{H}_4)]^x = k[\text{LA}]^1$ , where  $k_{obs} = k_{app}[\text{Na}(\text{THF})_3(\text{Ph}_2\text{P}(\text{Se})\text{N}(2\text{-NO}_2)\text{-C}_4\text{H}_4)]^x$ . A plot of  $\ln(k_{obs})$  vs.  $\ln[\text{Na}(\text{THF})_3(\text{Ph}_2\text{P}(\text{Se})\text{N}(2\text{-NO}_2)\text{-C}_4\text{H}_4)]$  (Figure FS41, Table TS8) is linear, indicating the order of  $[\text{Na}(\text{THF})_3(\text{Ph}_2\text{P}(\text{Se})\text{N}(2\text{-NO}_2)\text{-C}_4\text{H}_4)]$  is ( $x = 0.82$  or 1) and  $k_{app}$  which is  $0.755 \text{ M}^{-1}\text{m}^{-1}$ . ( $\ln k_{app} = -0.28$ ).

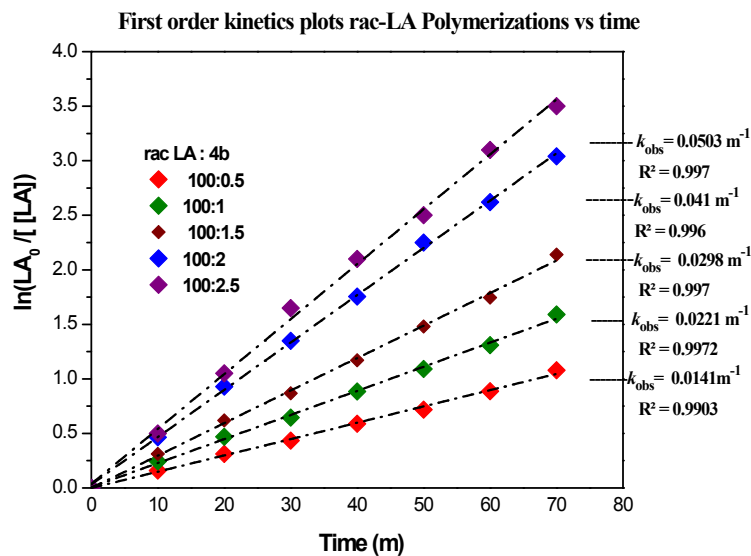

**Figure FS40.** First order kinetics plots for *rac* LA polymerizations with time in  $CDCl_3$  (1 mL) with different concentration of  $[Na(THF)_3(Ph_2P-(Se)N(2-(NO_2)-C_4H_4)]$  (**4b**) at 25°C.

**Table TS8.** Kinetics plots of  $\ln k_{obs}$  vs  $\ln[Na(THF)_3(Ph_2P-(Se)N(2-(NO_2)-C_4H_4)]/\ln(\mathbf{4b})$  for the polymerization of *rac*-LA with  $[LA] = 2.0$  M in  $CDCl_3$  (1 mL) at 25°C.

| S.NO. | $[Na(THF)_3(Ph_2P-(Se)N(2-(NO_2)-C_4H_4)]$ ( <b>4b</b> ) (M) | $\ln k_{obs}$ ( $Mm^{-1}$ ) |
|-------|--------------------------------------------------------------|-----------------------------|
| 1     | -4.6                                                         | -4.26                       |
| 2     | -3.912                                                       | -3.812                      |
| 3     | -3.506                                                       | -3.513                      |
| 4     | -3.218                                                       | -3.19                       |
| 5     | -2.813                                                       | -2.99                       |

**Table TS9.** Kinetics plots of  $k_{obs}$  vs  $[Na(THF)_3(Ph_2P-(Se)N(2-(NO_2)-C_4H_4)]$  (**4b**) for the polymerization of *rac*-LA with  $[LA] = 2.0$  M in  $CDCl_3$  (1 mL) at 25°C.

| S. NO. | $[Na(THF)_3(Ph_2P-(Se)N(2-(NO_2)-C_4H_4)]$ ( <b>4b</b> ) (M) | $k_{obs}$ ( $Mm^{-1}$ ) |
|--------|--------------------------------------------------------------|-------------------------|
| 1      | 0                                                            | 0                       |
| 2      | 0.01                                                         | 0.0141                  |
| 3      | 0.02                                                         | 0.0221                  |

|   |      |        |
|---|------|--------|
| 4 | 0.03 | 0.0298 |
| 5 | 0.04 | 0.041  |
| 6 | 0.05 | 0.0503 |

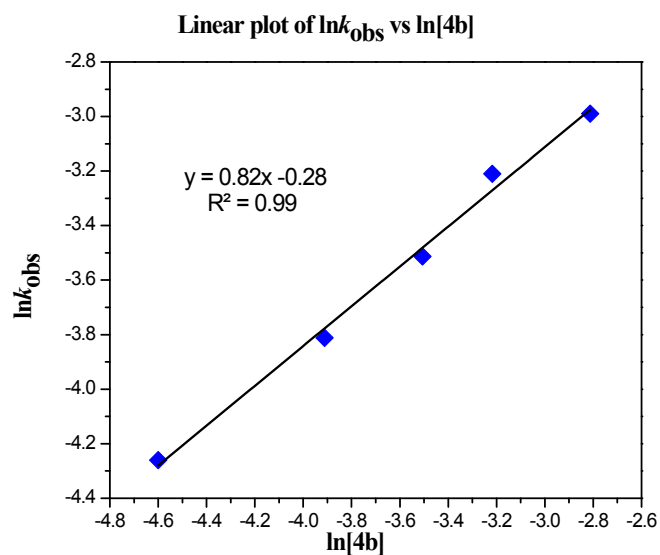

**Figure FS41.** Kinetics plots of  $\ln k_{obs}$  vs  $\ln[\text{Na}(\text{THF})_3(\text{Ph}_2\text{P}-(\text{Se})\text{N}(2-(\text{NO}_2)-\text{C}_4\text{H}_4)] / \ln(4b)$  for the polymerization of rac-LA with  $[\text{LA}] = 2.0 \text{ M}$  in  $\text{CDCl}_3$  (1 mL) at  $25^\circ\text{C}$ .

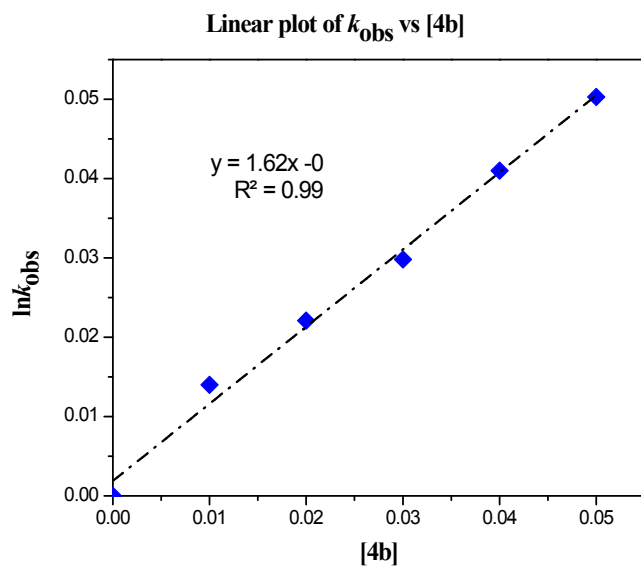

**Figure FS42.** Kinetics plots of  $k_{obs}$  vs  $[\text{Na}(\text{THF})_3(\text{Ph}_2\text{P}-(\text{Se})\text{N}(2-(\text{NO}_2)-\text{C}_4\text{H}_4)]$  (**4b**) for the polymerization of *rac*-LA with  $[\text{LA}] = 2.0 \text{ M}$  in  $\text{CDCl}_3$  (1 mL) at  $25^\circ\text{C}$ .

$$\text{Rate of the reaction} = -d[\text{LA}]/dt = 0.755 [\text{La}]^1[\text{Na}(\text{THF})_3(\text{Ph}_2\text{P}-(\text{Se})\text{N}(2-(\text{NO}_2)-\text{C}_4\text{H}_4))]^1.$$

| S.No | Catalyst                                                                                                                | <i>rac</i> -LA : catalyst | $k_{obs}$ in ( $\text{Mm}^{-1}$ ) |
|------|-------------------------------------------------------------------------------------------------------------------------|---------------------------|-----------------------------------|
| 1    | $[\text{Na}(\text{THF})_3(\text{Ph}_2\text{P}-(\text{Se})\text{N}(2-(\text{F})-\text{C}_4\text{H}_4)]$ ( <b>4a</b> )    | 100:0.5                   | 0.006                             |
| 2    | $[\text{Na}(\text{THF})_3(\text{Ph}_2\text{P}-(\text{Se})\text{N}(2-(\text{NO}_2)-\text{C}_4\text{H}_4)]$ ( <b>4b</b> ) | 100:0.5                   | 0.0141                            |
| 3    | $[\text{K}(\text{THF})_3(\text{Ph}_2\text{P}-(\text{Se})\text{N}(2-(\text{F})-\text{C}_4\text{H}_4)]$ ( <b>5a</b> )     | 100:0.5                   | 0.0143                            |
| 4    | $[\text{K}(\text{THF})_3(\text{Ph}_2\text{P}-(\text{Se})\text{N}(2-(\text{NO}_2)-\text{C}_4\text{H}_4)]$ ( <b>5b</b> )  | 100:0.5                   | 0.0256                            |
| 5    | $[\text{Na}(\text{THF})_3(\text{Ph}_2\text{P}-(\text{Se})\text{N}(2-(\text{F})-\text{C}_4\text{H}_4)]$ ( <b>4a</b> )    | 100:1                     | 0.0141                            |
| 6    | $[\text{Na}(\text{THF})_3(\text{Ph}_2\text{P}-(\text{Se})\text{N}(2-(\text{NO}_2)-\text{C}_4\text{H}_4)]$ ( <b>4b</b> ) | 100:1                     | 0.0221                            |
| 7    | $[\text{K}(\text{THF})_3(\text{Ph}_2\text{P}-(\text{Se})\text{N}(2-(\text{F})-\text{C}_4\text{H}_4)]$ ( <b>5a</b> )     | 100:1                     | 0.0279                            |
| 8    | $[\text{K}(\text{THF})_3(\text{Ph}_2\text{P}-(\text{Se})\text{N}(2-(\text{NO}_2)-\text{C}_4\text{H}_4)]$ ( <b>5b</b> )  | 100:1                     | 0.036                             |

**Table TS10:** Comparison of rate constants for polymerization of *rac*-LA with various concentration of  $[\text{Na}(\text{THF})_3(\text{Ph}_2\text{P}-(\text{Se})\text{N}(2-(\text{F})-\text{C}_4\text{H}_4)]$ (**4a**),  $[\text{Na}(\text{THF})_3(\text{Ph}_2\text{P}-(\text{Se})\text{N}(2-(\text{NO}_2)-\text{C}_4\text{H}_4)]$  (**4b**),  $[\text{K}(\text{THF})_3(\text{Ph}_2\text{P}-(\text{Se})\text{N}(2-(\text{F})-\text{C}_4\text{H}_4)]$  (**5a**),  $[\text{K}(\text{THF})_3(\text{Ph}_2\text{P}-(\text{Se})\text{N}(2-(\text{NO}_2)-\text{C}_4\text{H}_4)]$  (**5b**) as a catalyst.

|    |                                                                                                                   |         |        |
|----|-------------------------------------------------------------------------------------------------------------------|---------|--------|
| 9  | [Na(THF) <sub>3</sub> (Ph <sub>2</sub> P-(Se)N(2-(F)-C <sub>4</sub> H <sub>4</sub> )]( <b>4a</b> )                | 100:1.5 | 0.0194 |
| 10 | [Na(THF) <sub>3</sub> (Ph <sub>2</sub> P-(Se)N(2-(NO <sub>2</sub> )-C <sub>4</sub> H <sub>4</sub> )]( <b>4b</b> ) | 100:1.5 | 0.0298 |
| 11 | [K(THF) <sub>3</sub> (Ph <sub>2</sub> P-(Se)N(2-(F)-C <sub>4</sub> H <sub>4</sub> )] ( <b>5a</b> )                | 100:1.5 | 0.0394 |
| 12 | [K(THF) <sub>3</sub> (Ph <sub>2</sub> P-(Se)N(2-(NO <sub>2</sub> )-C <sub>4</sub> H <sub>4</sub> )] ( <b>5b</b> ) | 100:1.5 | 0.051  |
| 13 | [Na(THF) <sub>3</sub> (Ph <sub>2</sub> P-(Se)N(2-(F)-C <sub>4</sub> H <sub>4</sub> )]( <b>4a</b> )                | 100:2   | 0.0259 |
| 14 | [Na(THF) <sub>3</sub> (Ph <sub>2</sub> P-(Se)N(2-(NO <sub>2</sub> )-C <sub>4</sub> H <sub>4</sub> )]( <b>4b</b> ) | 100:2   | 0.041  |
| 15 | [K(THF) <sub>3</sub> (Ph <sub>2</sub> P-(Se)N(2-(F)-C <sub>4</sub> H <sub>4</sub> )] ( <b>5a</b> )                | 100:2   | 0.0562 |
| 16 | [K(THF) <sub>3</sub> (Ph <sub>2</sub> P-(Se)N(2-(NO <sub>2</sub> )-C <sub>4</sub> H <sub>4</sub> )] ( <b>5b</b> ) | 100:2   | 0.069  |
| 17 | [Na(THF) <sub>3</sub> (Ph <sub>2</sub> P-(Se)N(2-(F)-C <sub>4</sub> H <sub>4</sub> )]( <b>4a</b> )                | 100:2   | 0.0351 |
| 18 | [Na(THF) <sub>3</sub> (Ph <sub>2</sub> P-(Se)N(2-(NO <sub>2</sub> )-C <sub>4</sub> H <sub>4</sub> )]( <b>4b</b> ) | 100:2   | 0.0503 |
| 19 | [K(THF) <sub>3</sub> (Ph <sub>2</sub> P-(Se)N(2-(F)-C <sub>4</sub> H <sub>4</sub> )] ( <b>5a</b> )                | 100:2.5 | 0.0767 |
| 20 | [K(THF) <sub>3</sub> (Ph <sub>2</sub> P-(Se)N(2-(NO <sub>2</sub> )-C <sub>4</sub> H <sub>4</sub> )] ( <b>5b</b> ) | 100:2.5 | 0.092  |

**All reactions were carried out with 100 equiv. of monomer (2 M) in CDCl<sub>3</sub> at 25°C and followed to 99% conversion by <sup>1</sup>H NMR spectroscopy.**

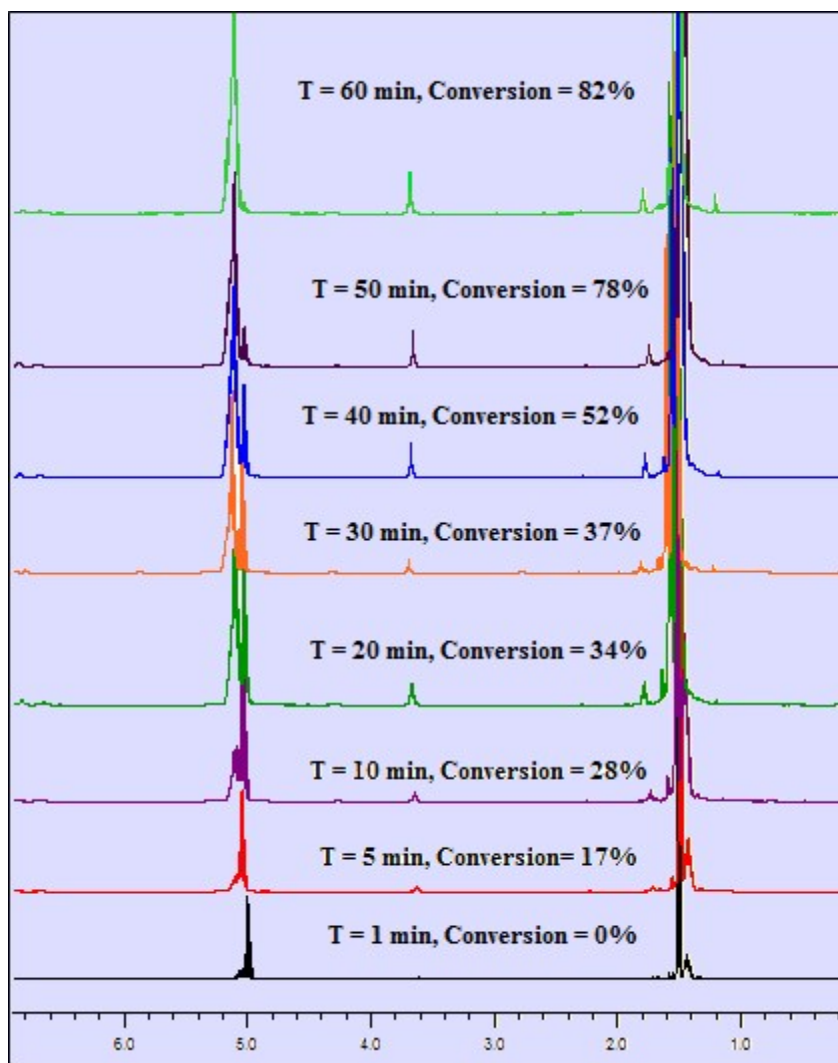

**Figure FS43.** Stack of  $^1\text{H}$  NMR spectra for the kinetic study of the polymerization of 400 eq. of *rac*-LA using **5b**. Conditions:  $[\text{rac-LA}] = 2\text{M}$ ,  $\text{CDCl}_3$ ,  $25^\circ\text{C}$ .

#### **Kinetics study in presence of benzyl alcohol as external initiator.**

##### **$[\text{K}(\text{THF})_3(\text{Ph}_2\text{P}(\text{Se})\text{N}(2\text{-(NO}_2\text{)-C}_4\text{H}_4))] (\mathbf{5b})$ as a catalyst in presence of BnOH.**

A typical kinetics study was conducted to establish the reaction order with respect monomer  $[\text{K}(\text{THF})_3(\text{Ph}_2\text{P}(\text{Se})\text{N}(2\text{-(NO}_2\text{)-C}_4\text{H}_4))] (\mathbf{5b})$  and benzyl alcohol . For LA polymerization, *rac* – LA



(0.228 g, 2.0 mmol) and benzyl alcohol (0.02 mmol) was added to a solution of **5b** (0.01, 0.02, 0.03, 0.04, 0.05 M) in CDCl<sub>3</sub> (1 mL), respectively. The solution was set in the NMR tube at 25°C. At the indicated time intervals; the tube was analyzed by <sup>1</sup>H NMR. The rac-LA concentration [LA] was determined by integrating the quartet methine peak of LA at 5.01 ppm and broad singlet methine peak at 5.09-5.20 ppm. As expected, plots of [LA]<sub>0</sub>/[LA] vs. time for a wide range of **5b** are linear indicating the usual first order dependence on monomer concentration (Figure FS44). Thus, the rate expression can be written as  $-d[LA]/dt = k_{app}[La]^1 [K(THF)_3(Ph_2P-(Se)N(2-(NO_2)-C_4H_4))]^x = k_{obs}[LA]^1$ , where  $k_{obs} = k_{app}[K(THF)_3(Ph_2P-(Se)N(2-(F)C_4H_4))]^x$ . A plot of  $\ln(k_{obs})$  vs.  $\ln[K(THF)_3(Ph_2P-(Se)N(2-(NO_2)-C_4H_4))]$  (Figure FS 45) is linear, indicating the order of  $[K(THF)_3(Ph_2P-(Se)N(2-(NO_2)-C_4H_4))]$  is ( $x = 0.82$ ). From the kinetics data it clearly indicated that there was no change in values for rate constant for the ROP of rac-LA catalyzed by **5a** in presence of benzyl alcohol.(Figure FS44-FS46).

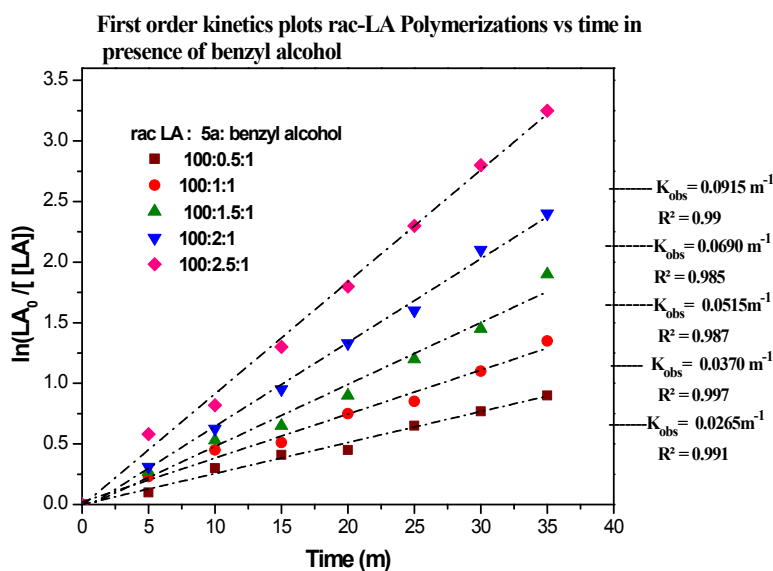

**Figure FS44.** First order kinetics plots for rac LA polymerizations with time in CDCl<sub>3</sub> (1 mL) with different concentration of  $[K(THF)_3(Ph_2P-(Se)N(2-(NO_2)-C_4H_4))]$  (**5b**) at 25°C having having *rac* – LA (0.228 g, 2.0 mmol) and benzyl alcohol (0.01 mmol).

**Table TS11.** Kinetics plots of  $\ln k_{obs}$  vs  $\ln[K(THF)_3(Ph_2P-(Se)N(2-(NO_2)-C_4H_4)]/\ln(5b)$  for the polymerization of rac-LA with [LA] = 2.0 M in CDCl<sub>3</sub> (1 mL) at 25°C.

| S.NO. | $\ln[K(THF)_3(Ph_2P-(Se)N(2-(NO_2)-C_4H_4)]/\ln(5b)$ (M) | $\ln k_{obs}$ (Mm <sup>-1</sup> ) |
|-------|----------------------------------------------------------|-----------------------------------|
| 1     | -4.6                                                     | -3.63                             |

|   |        |       |
|---|--------|-------|
| 2 | -3.912 | -3.30 |
| 3 | -3.506 | -2.97 |
| 4 | -3.218 | -2.67 |
| 5 | -2.813 | -2.39 |

**Table TS12.** Kinetics plots of  $k_{obs}$  [ $K(THF)_3(Ph_2P-(Se)N(2-(NO_2)-C_4H_4))$  (**5b**) for the polymerization of rac-LA with  $[LA] = 2.0$  M in  $CDCl_3$  (1 mL) at  $25^\circ C$ .

| S. NO. | $[K(THF)_3(Ph_2P-(Se)N(2-(NO_2)-C_4H_4))$ ( <b>5b</b> ) (M) | $k_{obs}$ (Mm <sup>-1</sup> ) |
|--------|-------------------------------------------------------------|-------------------------------|
| 1      | 0                                                           | 0                             |
| 2      | 0.01                                                        | 0.0265                        |
| 3      | 0.02                                                        | 0.0370                        |
| 4      | 0.03                                                        | 0.0515                        |
| 5      | 0.04                                                        | 0.0690                        |
| 6      | 0.05                                                        | 0.0915                        |

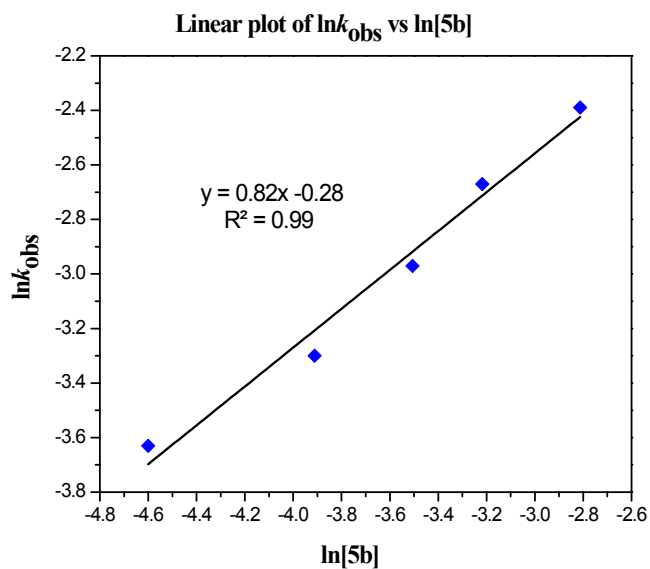

**Figure FS45.** Kinetics plots of  $\ln k_{obs}$  vs  $\ln[\text{K}(\text{THF})_3(\text{Ph}_2\text{P}-(\text{Se})\text{N}(2-(\text{NO}_2)-\text{C}_4\text{H}_4)] / \ln(\mathbf{5b})$  for the polymerization of *rac*-LA with  $[\text{LA}] = 2.0 \text{ M}$  in  $\text{CDCl}_3$  (1 mL) at  $25^\circ\text{C}$ .

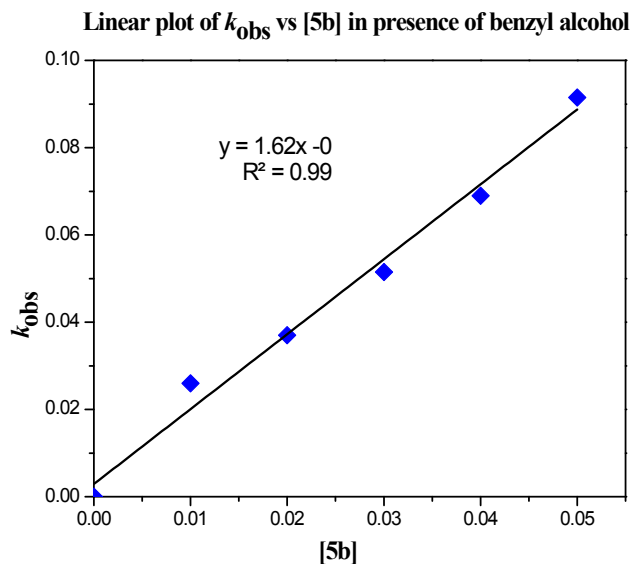

**Figure FS46.** Kinetics plots of  $k_{obs}$  vs  $[\text{K}(\text{THF})_3(\text{Ph}_2\text{P}-(\text{Se})\text{N}(2-(\text{NO}_2)-\text{C}_4\text{H}_4)]$  ( $\mathbf{5b}$ ) for the polymerization of *rac*-LA with  $[\text{LA}] = 2.0 \text{ M}$  in  $\text{CDCl}_3$  (1 mL) at  $25^\circ\text{C}$ .

$$\text{Rate of the reaction} = -d[\text{LA}]/dt = 0.755 [\text{La}]^1 [\text{K}(\text{THF})_3(\text{Ph}_2\text{P}-(\text{Se})\text{N}(2-(\text{NO}_2)-\text{C}_4\text{H}_4)]^1.$$

Several reactions were conducted varying the concentration of benzyl alcohol (0.01, 0.02, 0.04, 0.08, 0.1 M) in wide range and keeping the concentration of catalyst  $\mathbf{5b}$  (0.02M) and *rac*-LA (0.228 g, 2.0 mmol) constant. The plot of  $[\text{LA}]_0/[\text{LA}]$  vs. time for a wide range of  $\mathbf{5b}$  are linear indicating the usual first order dependence on monomer concentration (Figure FS47) but in all cases the value of rate constant  $k_{obs}$  remain same. This lack of dependence on benzylalcohol concentration confirms its zero-order contribution to the rate law (Figure FS547-49). So Kinetics study prove that polymerization reaction does not depends on external initiator and our catalyst itself act as an initiator for ROP of *rac*-LA.

First order kinetics plots *rac*-LA Polymerizations vs time in presence of benzyl alcohol

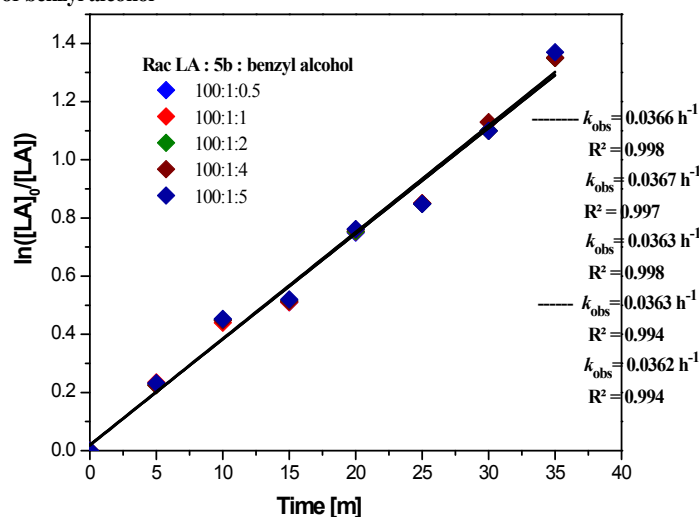

**Figure FS47.** First order kinetics plots for *rac*- LA polymerizations with time in  $\text{CDCl}_3$  (1 mL) with different concentration of Benzyl alcohol at  $25^\circ\text{C}$  having *rac*- LA (0.228 g, 2.0 mmol) and  $[\text{K}(\text{THF})_3(\text{Ph}_2\text{P}(\text{Se})\text{N}(2-(\text{NO}_2)\text{-C}_4\text{H}_4))] (\mathbf{5b})$  (0.02 mmol).

**Table TS13.** Kinetics plots of  $\ln k_{obs}$  vs  $\ln[\text{benzyl alcohol}]$  for the polymerization of *rac*-LA with  $[\text{LA}] = 2.0 \text{ M}$  and  $[\text{K}(\text{THF})_3(\text{Ph}_2\text{P}(\text{Se})\text{N}(2-(\text{NO}_2)\text{-C}_4\text{H}_4))] (\mathbf{5b})$  (0.02 mmol) in  $\text{CDCl}_3$  (1 mL) at  $25^\circ\text{C}$ .

| S.NO. | $\ln \text{Benzyl alcohol}(\text{M})$ | $\ln k_{obs} (\text{Mh}^{-1})$ |
|-------|---------------------------------------|--------------------------------|
| 1     | -4.60                                 | -3.315                         |
| 2     | -3.91                                 | -3.32                          |
| 3     | -3.21                                 | -3.32                          |
| 4     | -2.52                                 | -3.30                          |
| 5     | -2.30                                 | -3.31                          |

**Table TS14.** Kinetics plots of  $k_{obs}$  vs  $[\text{benzyl alcohol}]$  for the polymerization of *rac*-LA with  $[\text{LA}] = 2.0 \text{ M}$  and  $[\text{K}(\text{THF})_3(\text{Ph}_2\text{P}(\text{Se})\text{N}(2-(\text{NO}_2)\text{-C}_4\text{H}_4))] (\mathbf{5b})$  (0.02 mmol) in  $\text{CDCl}_3$  (1 mL) at  $25^\circ\text{C}$ .

| S.NO. | Benzyl alcohol(M) | $k_{obs} (\text{Mh}^{-1})$ |
|-------|-------------------|----------------------------|
| 1     | 0.01              | 0.0362                     |
| 2     | 0.02              | 0.0363                     |
| 3     | 0.04              | 0.0363                     |
| 4     | 0.08              | 0.0367                     |
| 5     | 0.1               | 0.0366                     |

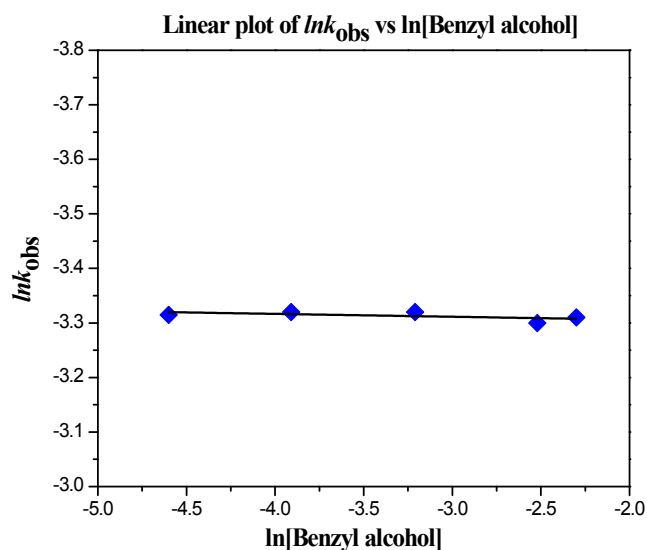

**Figure FS48.** Kinetics plots of  $\ln k_{obs}$  vs  $\ln[\text{benzyl alcohol}]$  for the polymerization of *rac*-LA with  $[\text{LA}] = 2.0 \text{ M}$  and  $[\text{K}(\text{THF})_3(\text{Ph}_2\text{P}-(\text{Se})\text{N}(2-(\text{NO}_2)-\text{C}_4\text{H}_4))] (\mathbf{5b}) (0.02 \text{ mmol})$  in  $\text{CDCl}_3$  (1 mL) at  $25^\circ\text{C}$ .

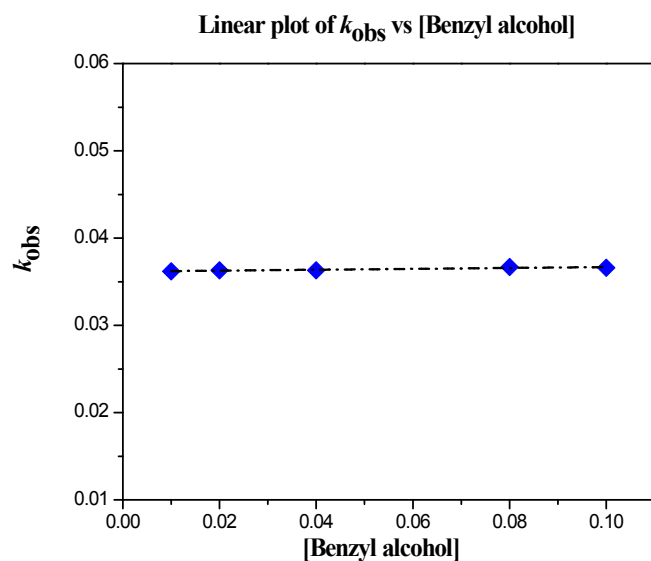

**Figure FS49.** Kinetics plots of  $k_{obs}$  vs  $[\text{benzyl alcohol}]$  for the polymerization of *rac*-LA with  $[\text{LA}] = 2.0 \text{ M}$  and  $[\text{K}(\text{THF})_3(\text{Ph}_2\text{P}-(\text{Se})\text{N}(2-(\text{NO}_2)-\text{C}_4\text{H}_4))] (\mathbf{5b}) (0.02 \text{ mmol})$  in  $\text{CDCl}_3$  (1 mL) at  $25^\circ\text{C}$ .

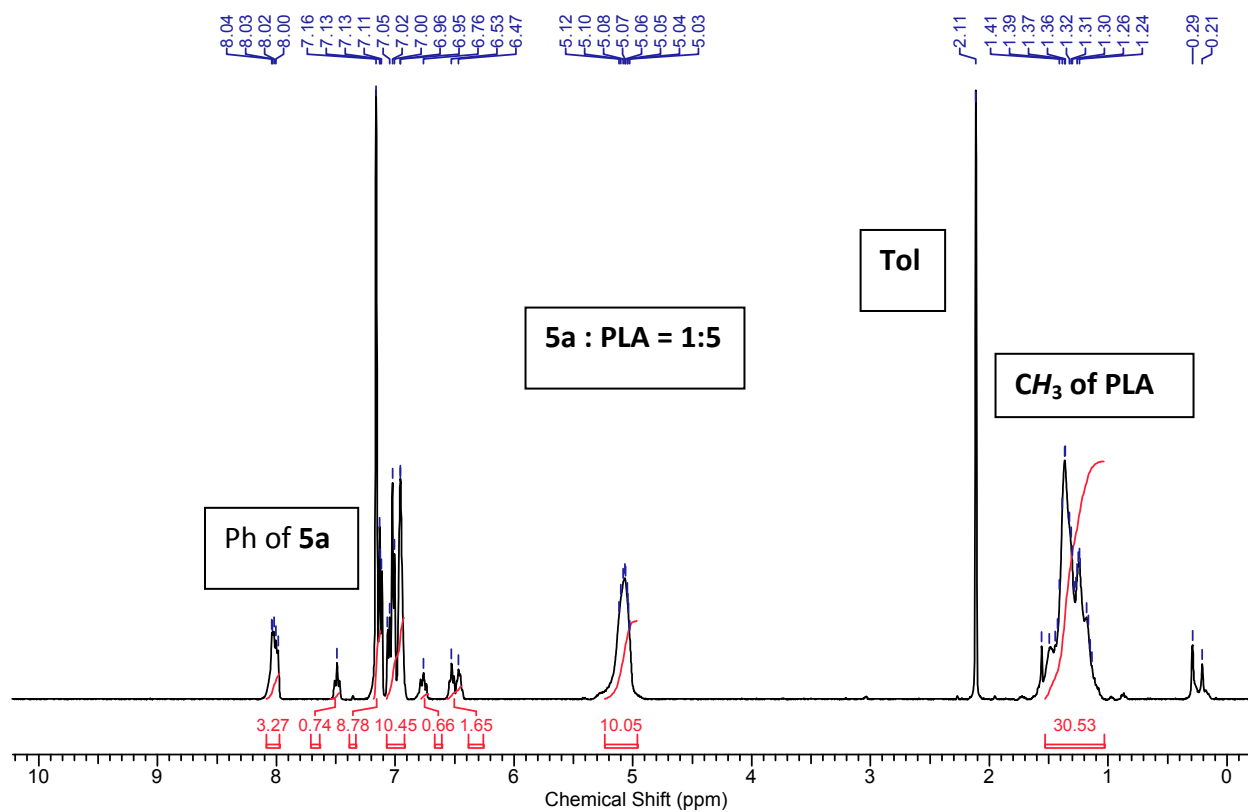

**Figure FS50.** <sup>1</sup>H NMR spectrum in C<sub>6</sub>D<sub>6</sub> for *rac*-LA catalyzed by (**5a**) having (*rac*-LA : **5a** = 5:1 ratio). Catalyst is present in equivalent amount with polymer moiety, which prove that catalyst itself initiate the polymerization process.

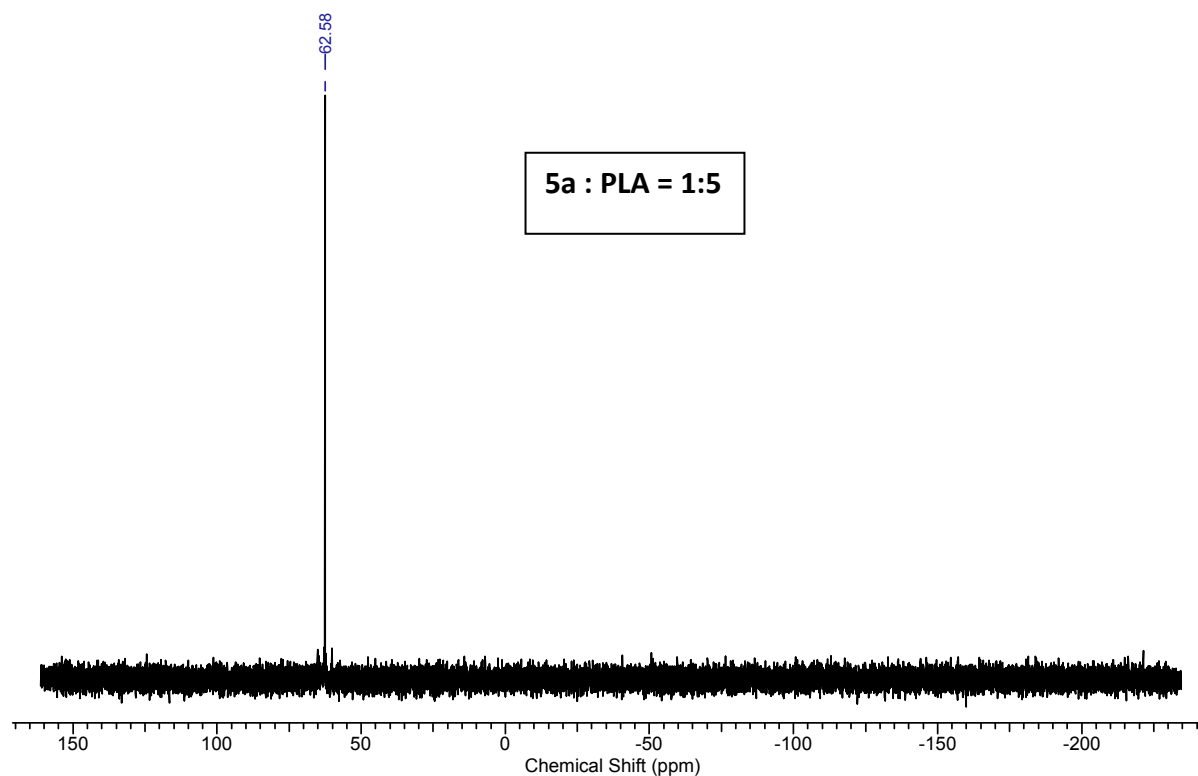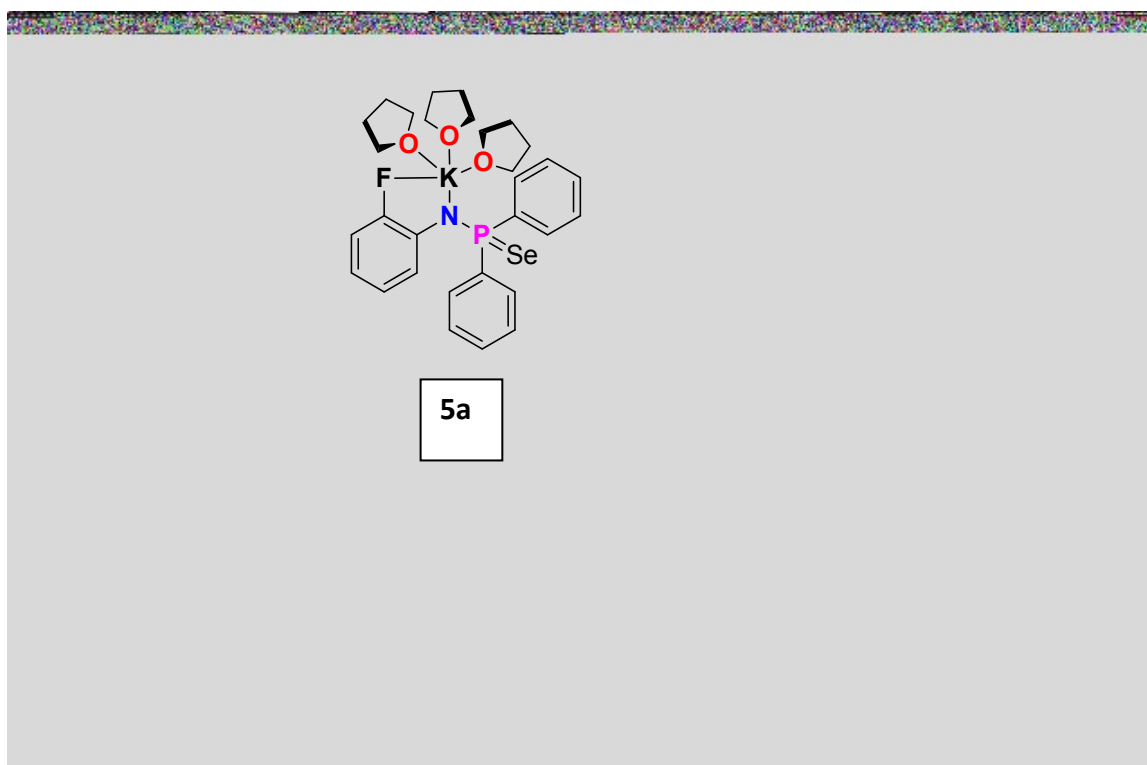

**Figure FS51.**  $^{31}\text{P}$  NMR spectrum in  $\text{C}_6\text{D}_6$  for *rac*-LA catalyzed by (**5a**) having (*rac*-LA : **5a** = 5:1 ratio) along with Alkali metal complex **5a**. The former peak is indicating the formation new selenium-carbon bond during the ring opening of the *rac*-LA initiated by potassium complex **5a** which is different than that of complex **5a**.

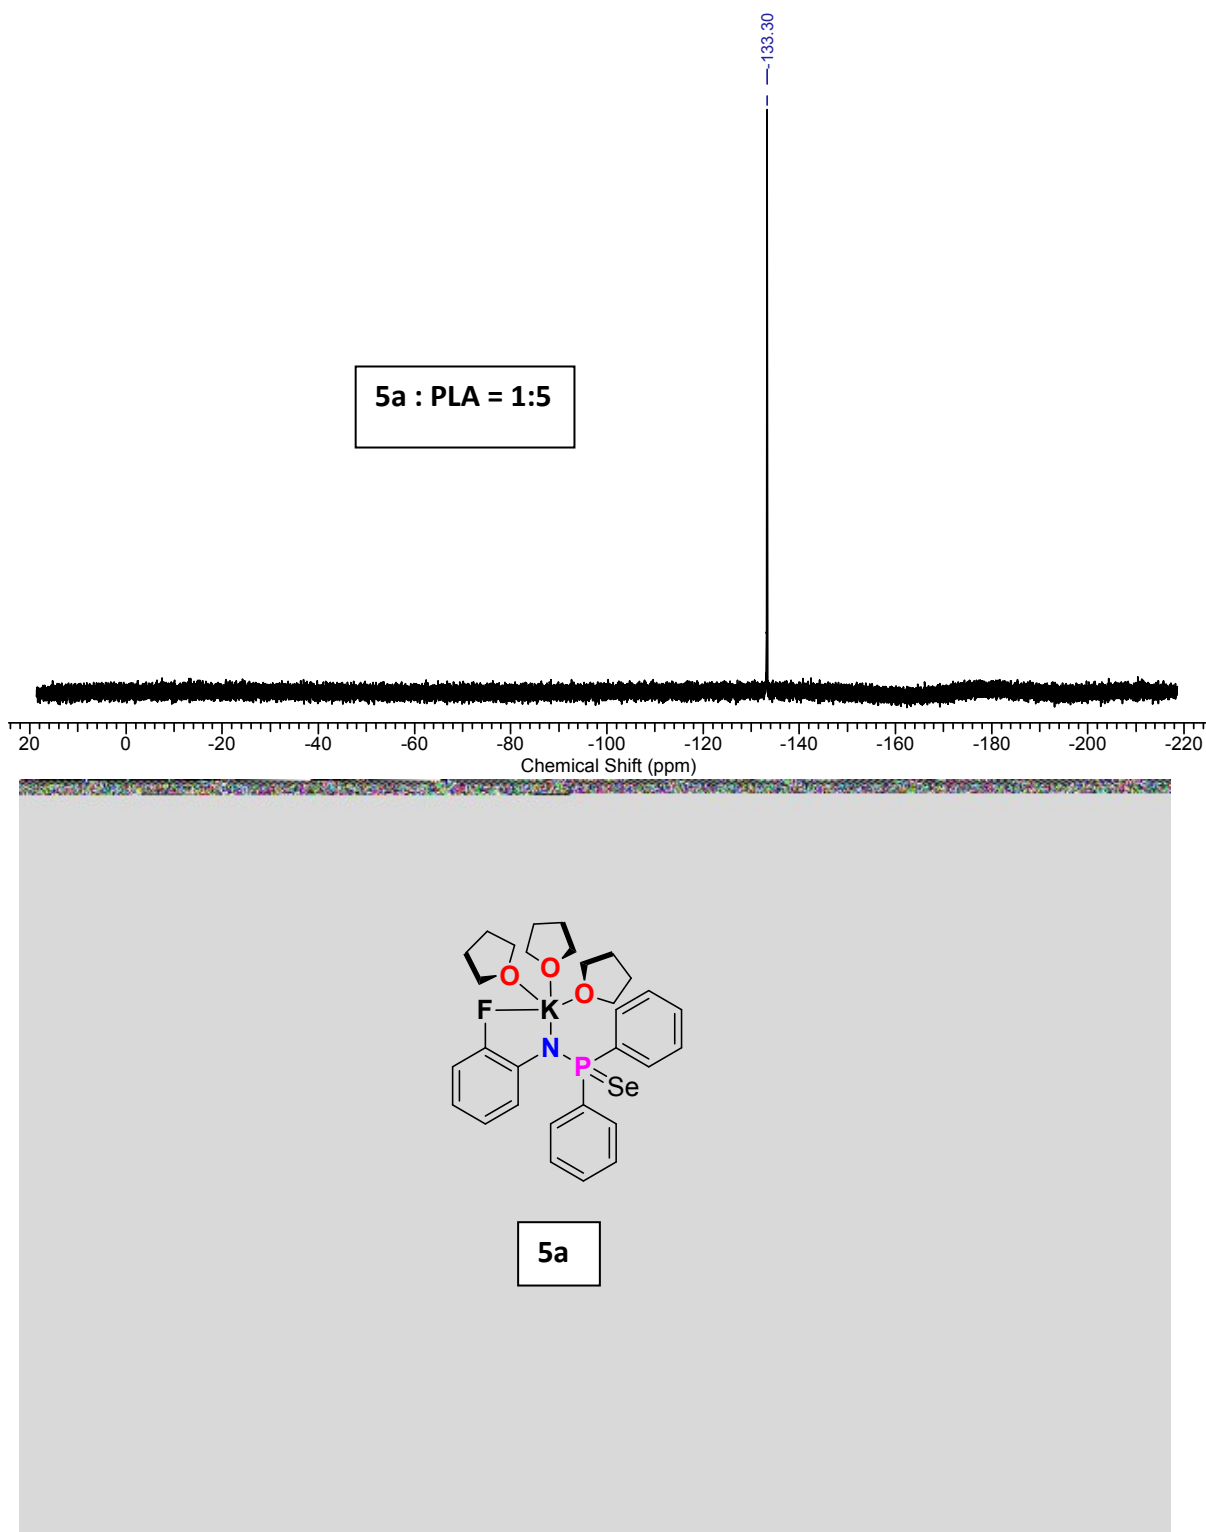

**Figure FS52:**  $^{19}\text{F}$  NMR spectra in  $\text{C}_6\text{D}_6$  for *rac*-LA catalyzed by (**5a**) having (*rac*-LA : **5a** = 5:1 ratio) along with Alkali metal complex **5a**. The former peak is indicating the formation new selenium-carbon bond during the ring opening of the *rac*-LA initiated by potassium complex **5a** which is different than the complex **5a**.



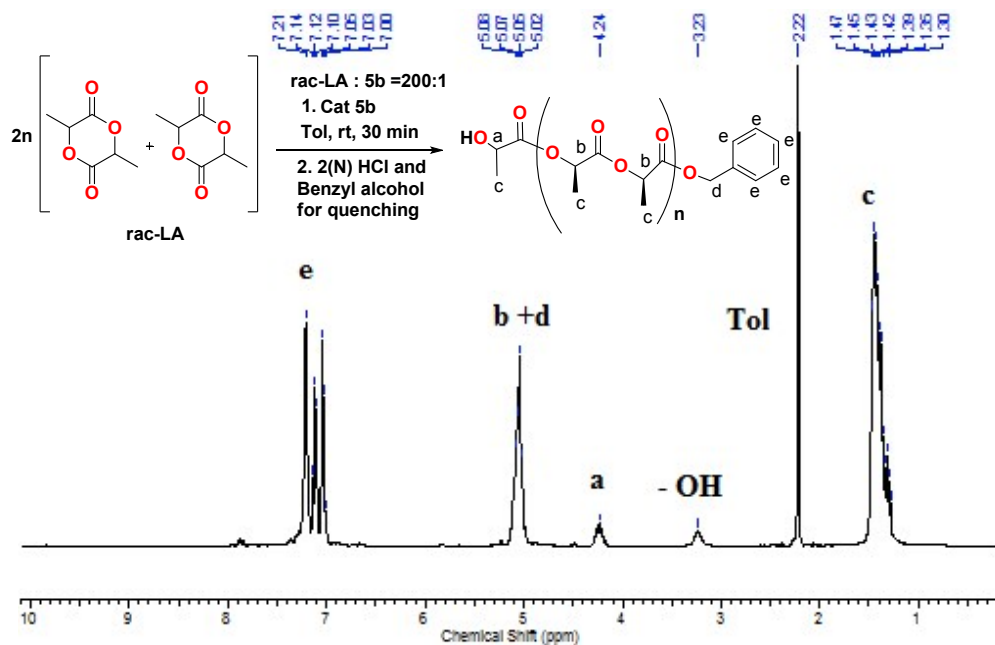

**Figure FS53.**  $^1\text{H}$  NMR spectrum of PLA prepared by catalyst **5b** in presence of benzylalcohol as a as well as terminator ( $[\text{LA}]_0/[\text{M}]_0 = 100:1$ ).

## Characterization Data

### Calculation of $P_r / P_m$ Values

Several mechanisms have been well established for the ROP of lactide including anionic, pseudo-anionic (general base catalysis), coordination–insertion ROP and monomer-activated mechanism. In all cases, stereocontrol can be realized by two different mechanisms, chain end control and enantiomorphic site control. In a chain end controlled mechanism, the chirality of the propagating chain end bound to the catalyst determines the chirality of the next monomer to be inserted; this is generally associated with hindered and achiral catalyst systems so chirality of the polymer depends upon on the chirality of the monomer. In case of Enantiomorphic site control, chirality of the polymer demonstrated depends on the chirality of the catalyst, and not the chain end, dictates the chirality of the next insertion. Due to the significant steric bulk of the phosphoimino ligands and the achiral natures of the alkaline earth metal based complexes they used in this manuscript, these catalysts are usually considered to be capable of stereocontrol in the polymerization of *rac*-lactide via a chain end control mechanism and a Bernoullian statistics mode was usually employed to calculate  $P_m / P_r$  values.  $P_m / P_r$  is the probability of mesomeric / racemic linkages between monomer units determined from the methine region of the homonuclear decoupled  $^1\text{H}$  NMR spectrum.  $P_r$  can also be expressed in terms of the enchainment rate constants:  $P_r = k_{R/SS}/(k_{R/SS} + k_{R/RR}) = k_{S/RR}/(k_{S/RR} + k_{S/SS})$ . The expressions for the tetrad concentrations in terms of  $P_r$ , assuming Bernoullian statistics and the absence of transesterification, are as follows:

tetrad Probability(*rac*-lactide)

$$\begin{aligned}
[mmm] & P_m^2 + (1-P_m)P_m/2 \\
[mmr] & (1-P_m)P_m/2 \\
[rmm] & (1-P_m)P_m/2 \\
[rmr] & (1-P_m)^2/2 \\
[rrr] & 0 \\
[rrm] & 0 \\
[mrr] & 0 \\
[mrm] & [(1-P_m)^2 + (1-P_m)P_m]/2
\end{aligned}$$

Most stereoselective ROP of *rac*-lactide in literatures involve only one single-site catalyst and the calculation of  $P_m / P_r$  usually use single-state statistic model even if in the case when *rac*-catalysts were used in ROP of *rac*-lactide.

**Details characterization data of Isotactic PLA formed by catalyst by (4b) at 90% conversion at 25 °C in toluene. (PLA: 4b = 300: 0.01 having Mn = 37.4 KDa, Mw = 54.7 KDa and PDI = 1.46).**

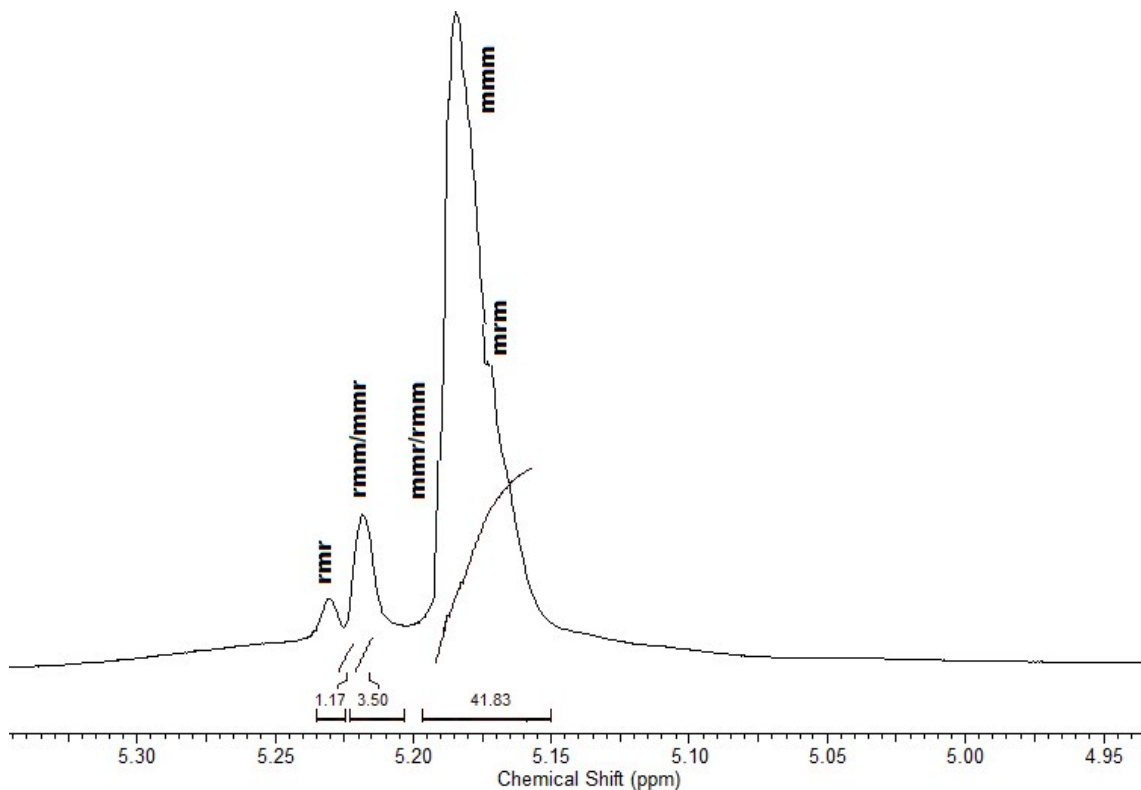

**Figure FS54.**  $^1\text{H}\{^1\text{H}\}$  NMR spectra ( $\text{CDCl}_3$ , 25 °C) of methine regions for ROP of *rac*-LA

### Analysis

Equations used:

$$[mmm] = (P_m)^2 + P_r P_m/2$$

$$[mmr] = P_r P_m/2$$

$$[rmm] = P_r P_m/2$$

$$[rmr] = (P_r)^2/2$$

$$[mrm] = ((P_r)^2 + P_r P_m)/2$$

$$P_r = \sqrt{(1.17/1.17+3.50+41.83)} = 0.22$$

$$P_m = 2 (3.99/55.89) / 0.189 = 0.69$$

\*Effectively only these two equations are used in the calculations as the other peaks cannot be accurately integrated.

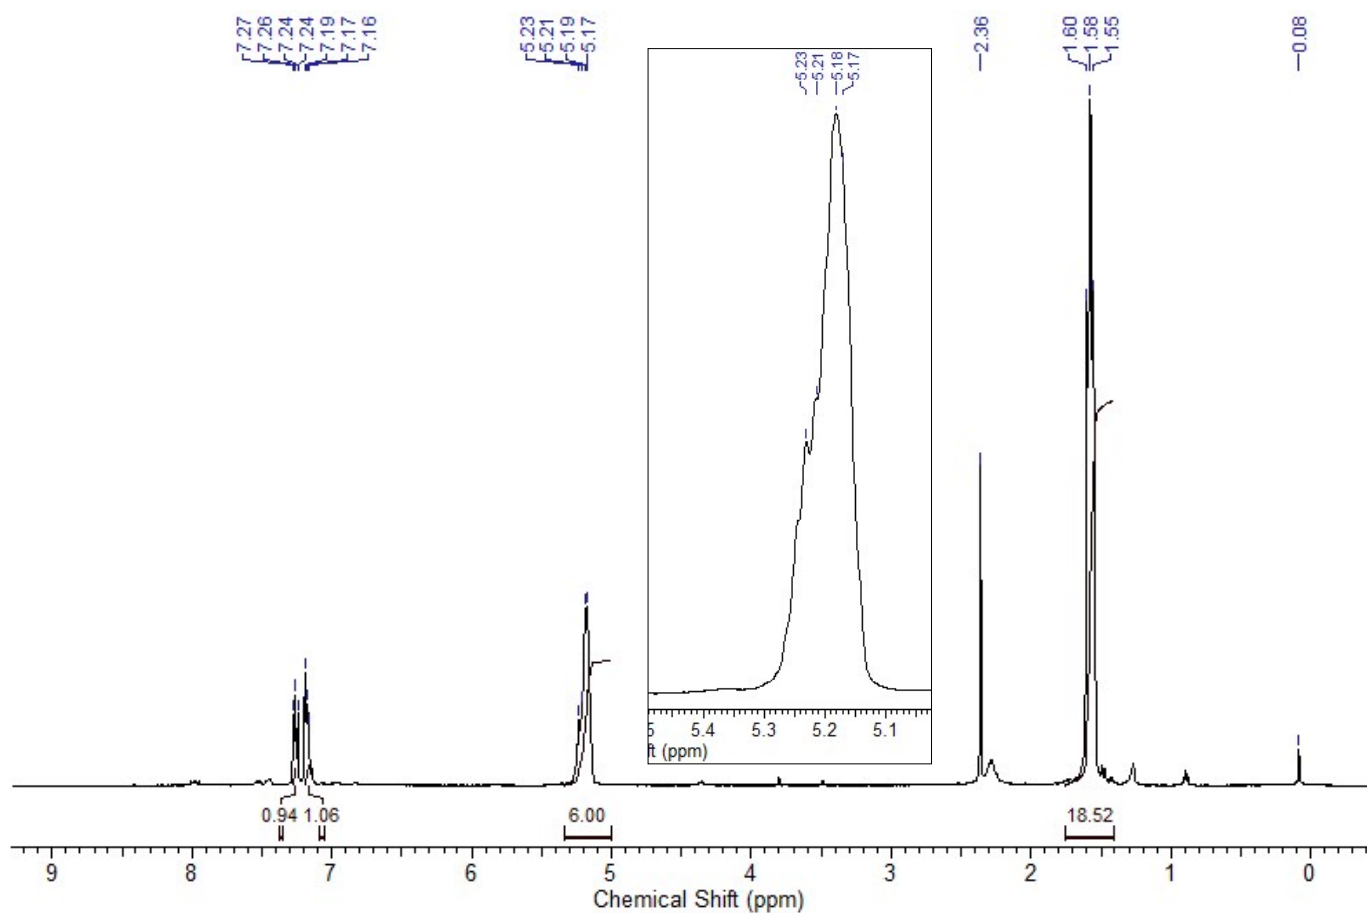

**Figure FS55.** <sup>1</sup>H NMR spectra (CDCl<sub>3</sub>, 25 °C) of methine regions for ROP of rac-LA.

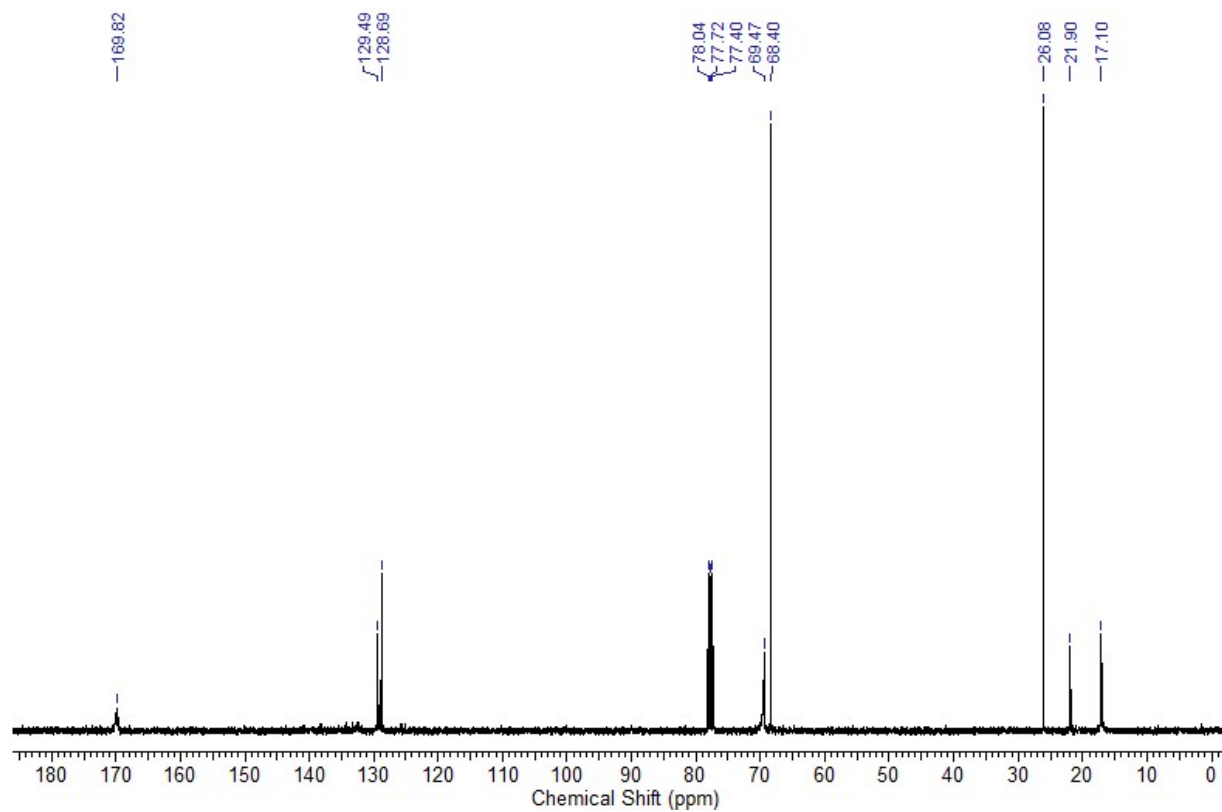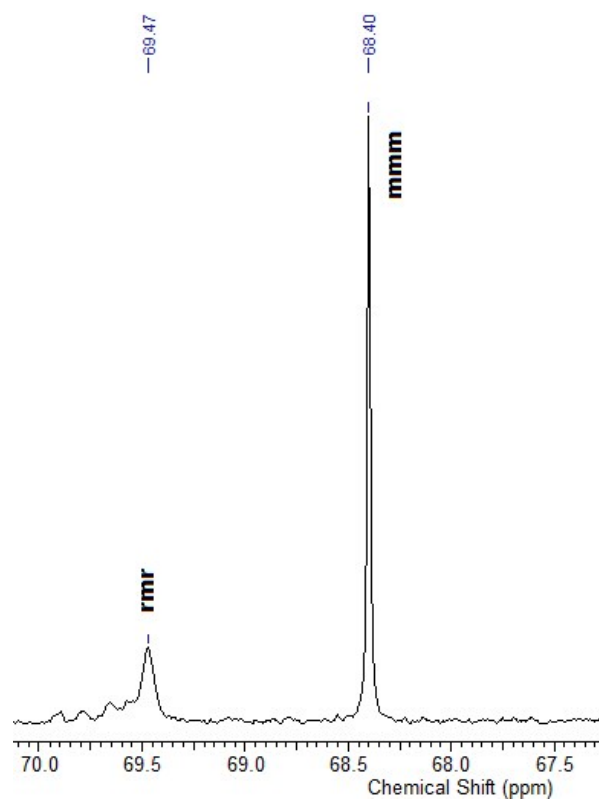

**Figure FS56.**  $^{13}\text{C}$  NMR spectra ( $\text{CDCl}_3$ , 25 °C) of methine regions for ROP of rac-LA.

Details characterization data of Isotactic PLA formed by catalyst by (4b) at 95% conversion at 25 °C in toluene. (PLA: 4b = 100: 0.01 having Mn = 13.6 KDa, Mw = 19.1 KDa and PDI = 1.39).

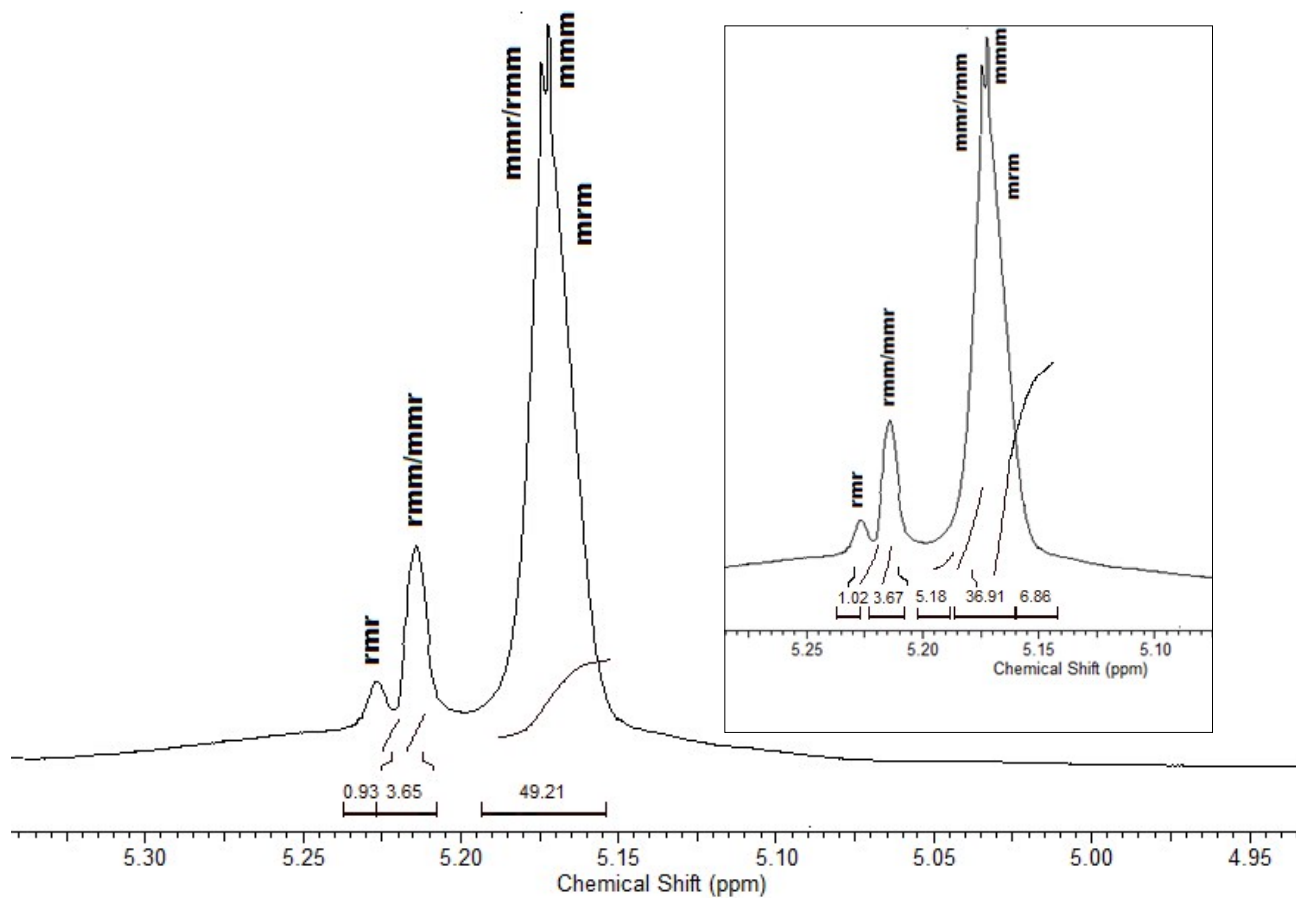

Figure FS 57.  $^1\text{H}\{^1\text{H}\}$  NMR spectra ( $\text{CDCl}_3$ , 25 °C) of methine regions for ROP of rac-LA.

Analysis

| Peak | Integration | Pm |
|------|-------------|----|
|------|-------------|----|

$$[mmm] = P_m(P_m+1)/2$$

$$[mmr] = P_m(1 - P_m)/2$$

$$[rmm] = P_m(1 - P_m)/2$$

$$[rmr] = (1 - P_m)^2/2$$

$$[rrm] = (1 - P_m)^2/2$$

|                |               |             |
|----------------|---------------|-------------|
| [mmm]          | <b>0.68</b>   | <b>0.77</b> |
| [mmr]          | <b>0.096</b>  | <b>0.74</b> |
| [rmm]          | <b>0.067</b>  | <b>0.84</b> |
| [rmr]          | <b>0.0185</b> | <b>0.80</b> |
| [rrm]          | <b>0.127</b>  | <b>0.75</b> |
| <b>Average</b> |               | <b>0.78</b> |

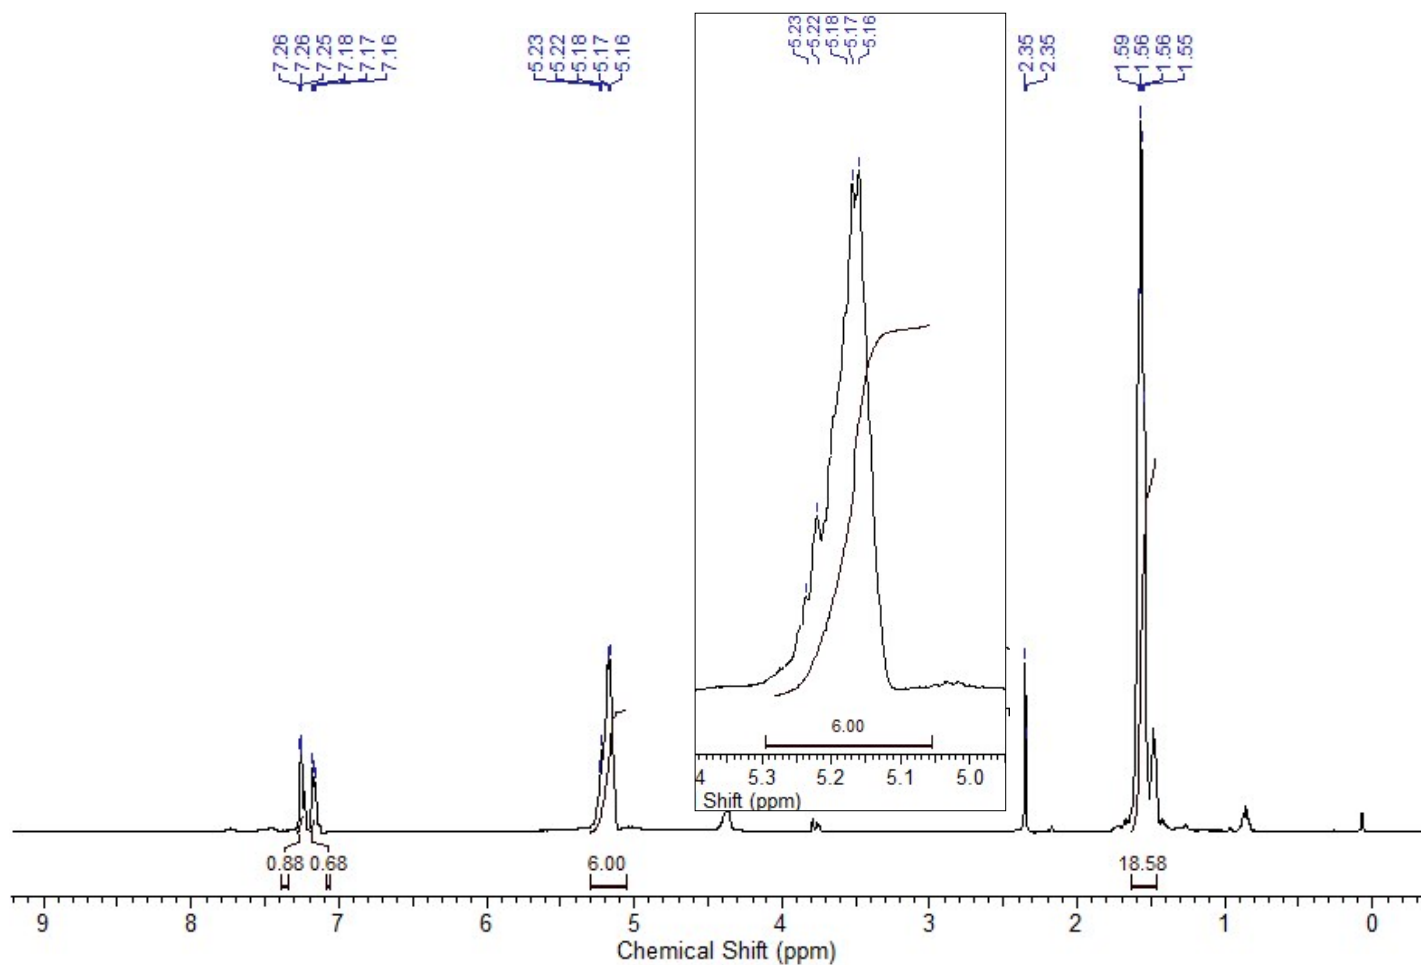

**Figure FS58.** <sup>1</sup>H NMR spectra (CDCl<sub>3</sub>, 25 °C) of methine regions for ROP of rac-LA.

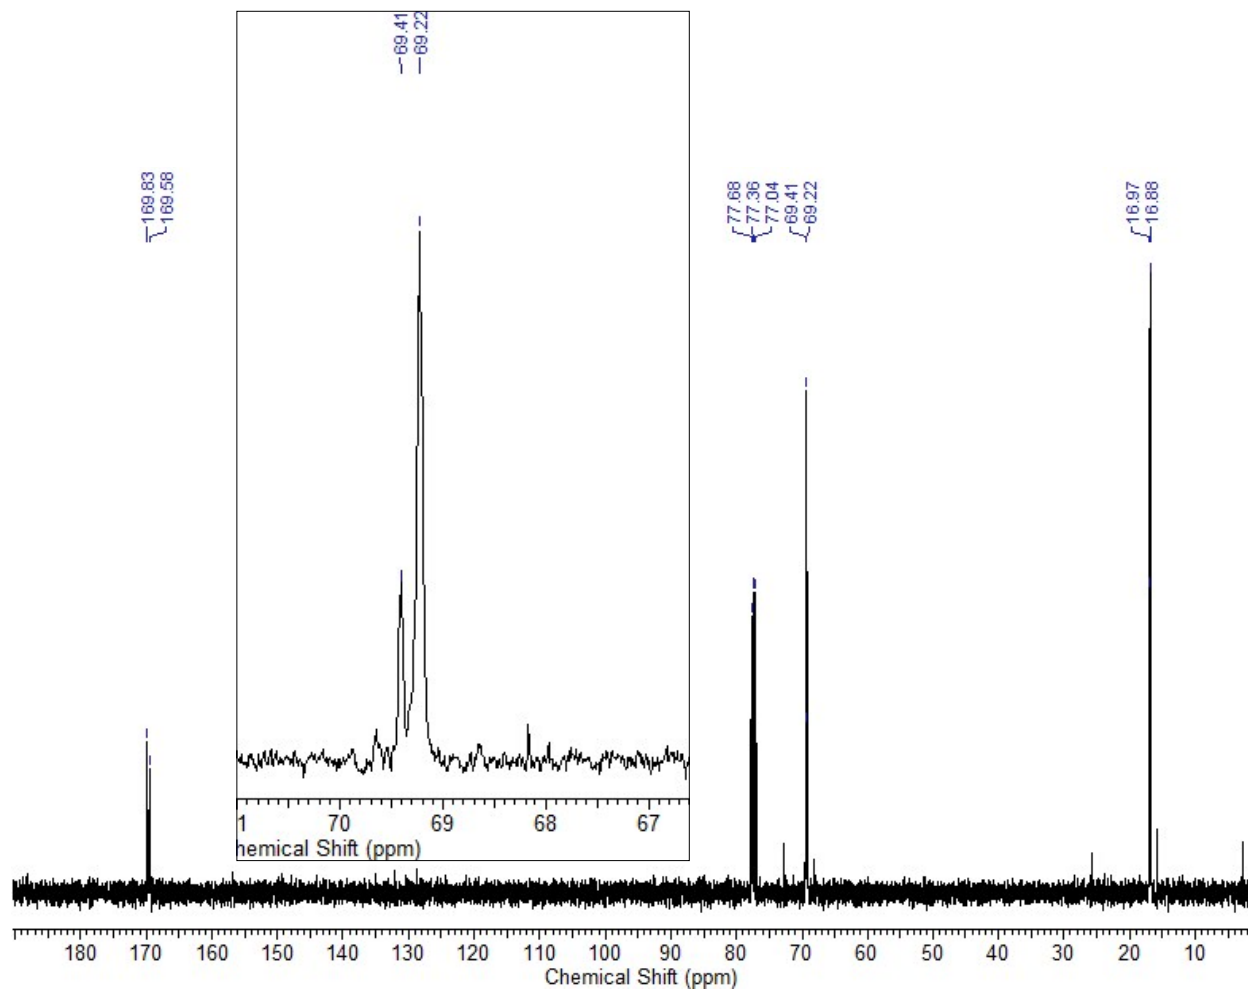

**Figure FS59.** Homocoupling  $^{13}\text{C}$  NMR spectrum for ROP of rac-LA.

Details characterization data of Isotactic PLA formed by catalyst by (4a) at 88% conversion at 25 °C in toluene. (PLA: 4a = 100: 0.01 having Mn = 11.3 KDa, Mw = 15.6 KDa and PDI = 1.31).

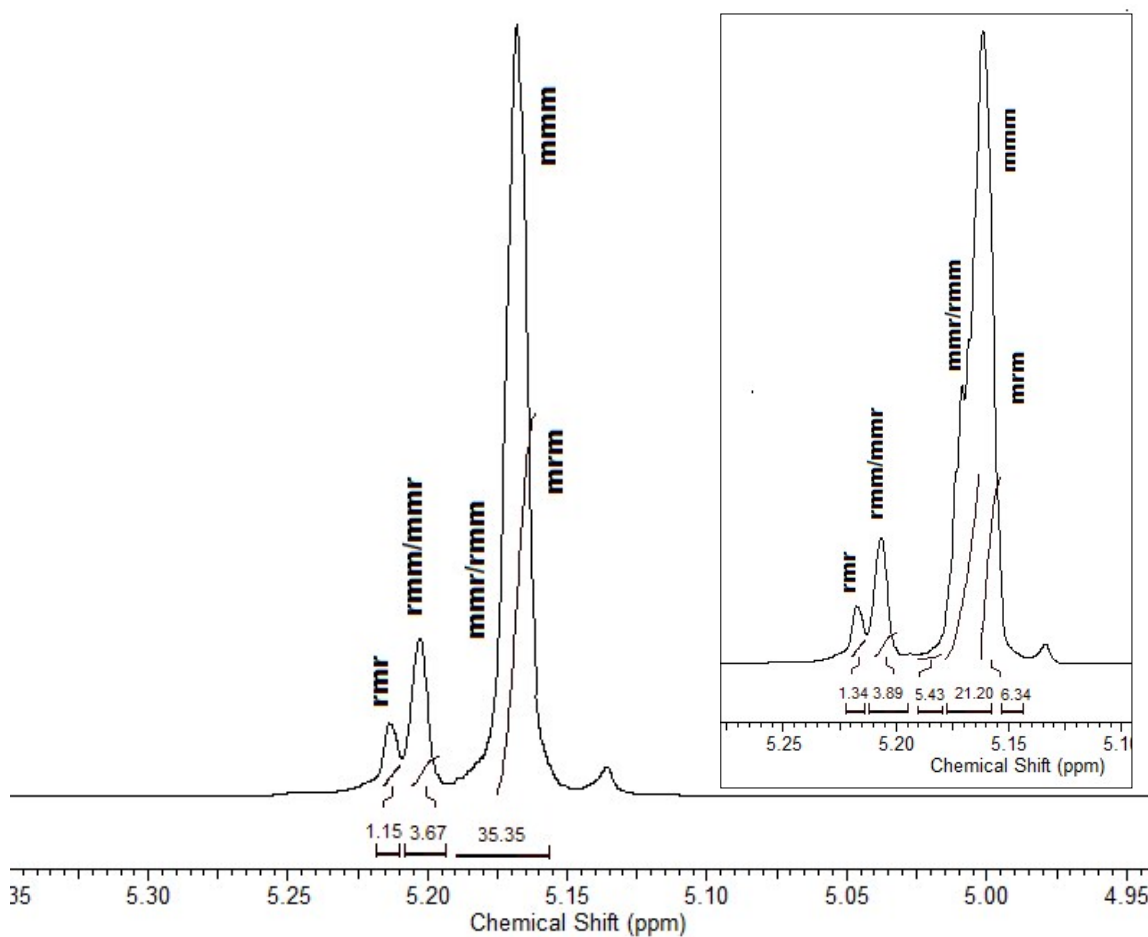

**Figure FS60.**  $^1\text{H}\{^1\text{H}\}$  NMR spectra ( $\text{CDCl}_3$ , 25 °C) of methine regions for ROP of rac-LA

### Analysis

$$[\text{mmm}] = P_m(P_m+1)/2$$

$$[\text{mmr}] = P_m(1 - P_m)/2$$

$$[\text{rmm}] = P_m(1 - P_m)/2$$

$$[\text{rmr}] = (1 - P_m)^2/2$$

$$[\text{mrm}] = (1 - P_m)/2$$

| Peak    | Integration | Pm   |
|---------|-------------|------|
| [mmm]   | 0.56        | 0.67 |
| [mmr]   | 0.140       | 0.71 |
| [rmm]   | 0.105       | 0.69 |
| [rmr]   | 0.0353      | 0.73 |
| [mrm]   | 0.167       | 0.67 |
| Avarage |             | 0.70 |



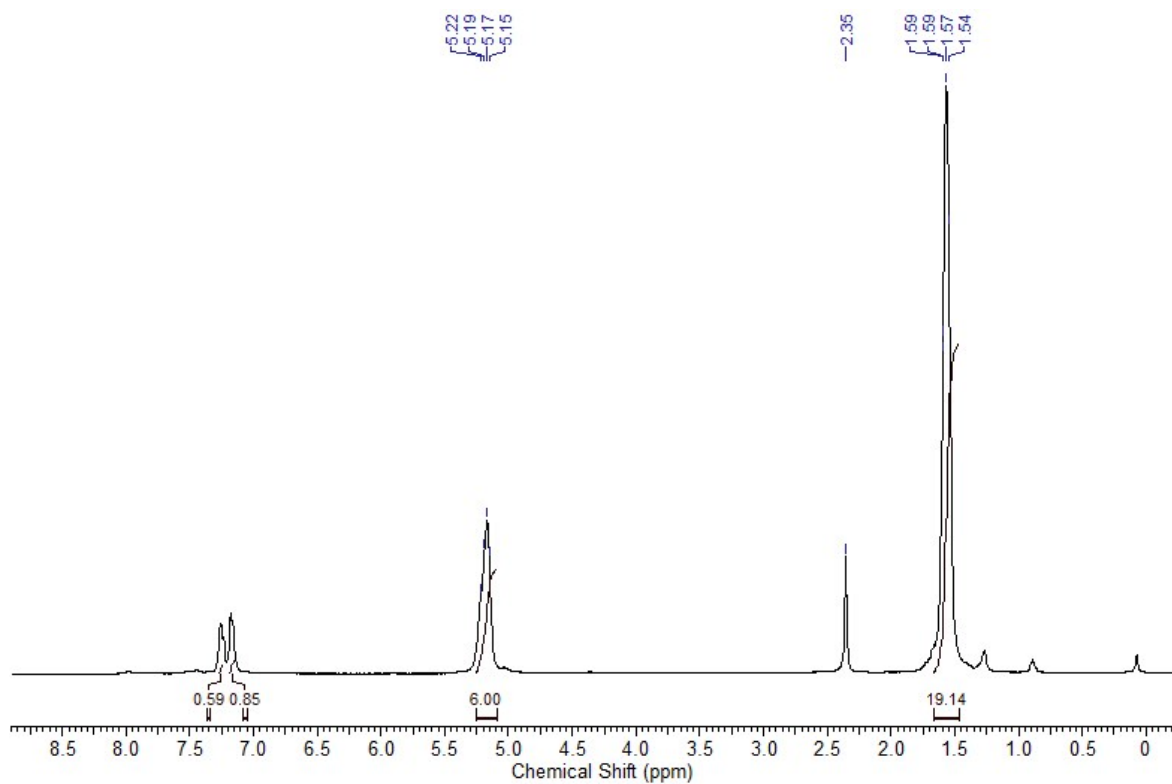

**Figure FS61.** <sup>1</sup>H NMR spectra (CDCl<sub>3</sub>, 25 °C) of methine regions for ROP of rac-LA.

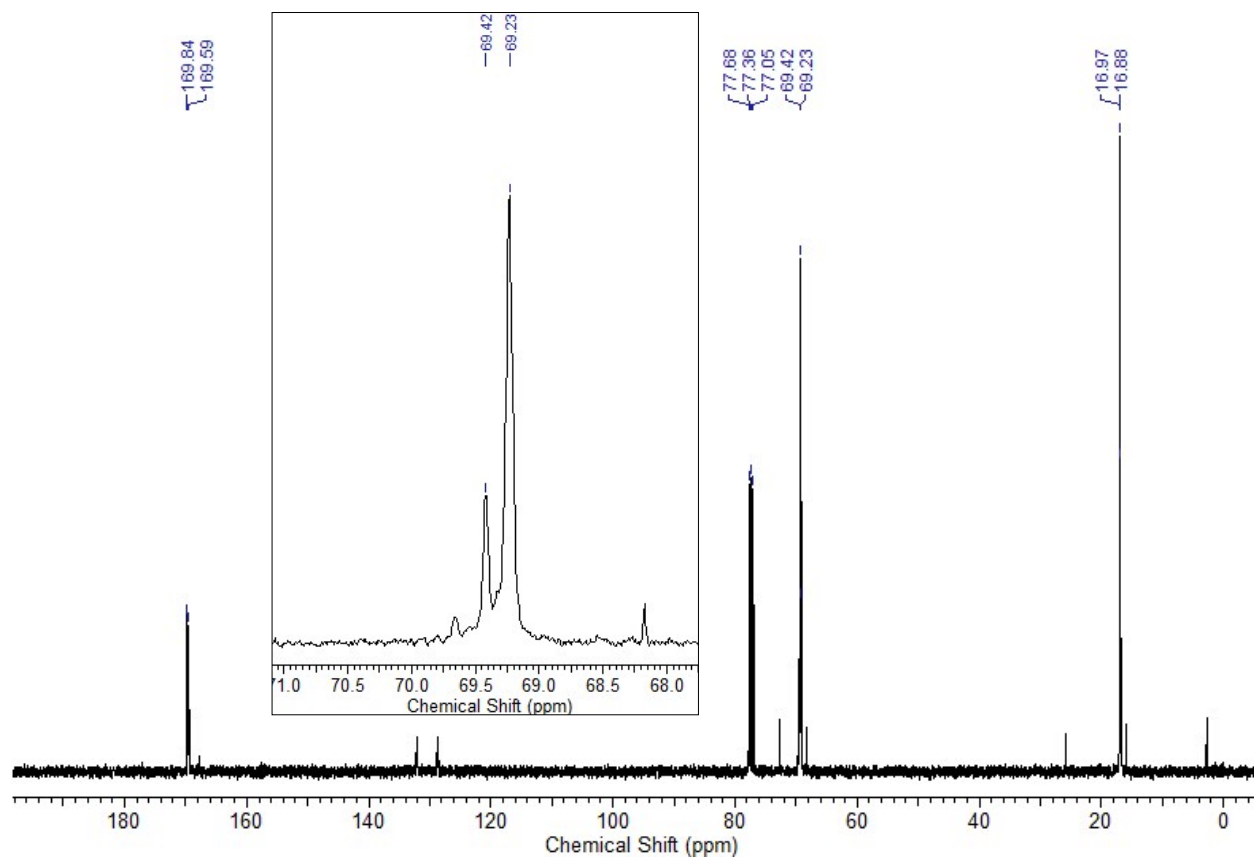

**Figure FS62.** Homocoupling  $^{13}\text{C}$  NMR spectrum for ROP of rac-LA.

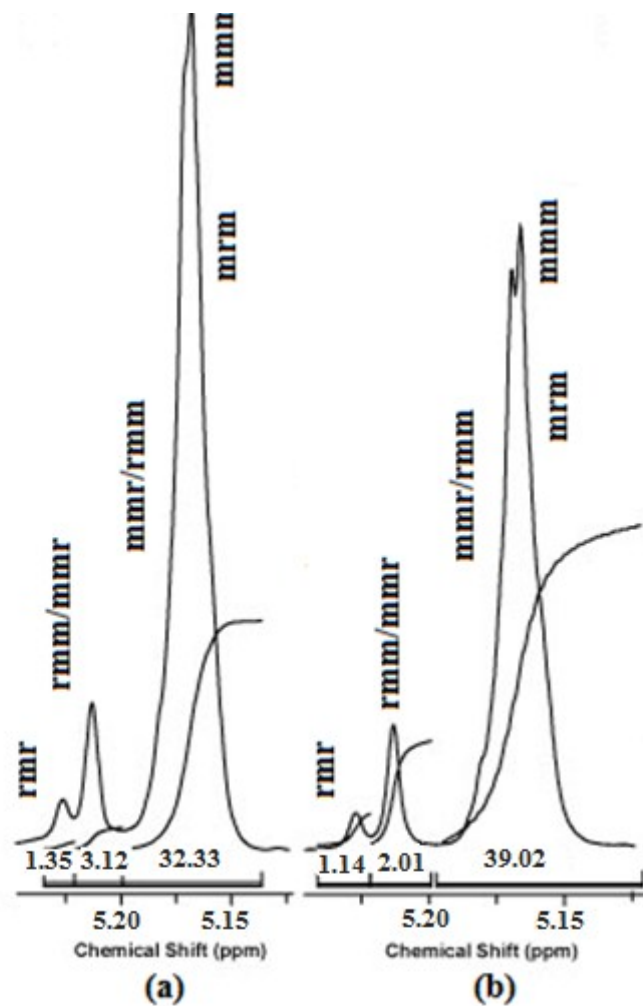

**Figure FS63.**  $^1\text{H}\{^1\text{H}\}$  NMR spectra ( $\text{CDCl}_3$ , 25 °C) of methine regions for ROP of rac-LA catalyzed by (5b) at 91% conversion and 93% conversion at 25 °C in toluene.

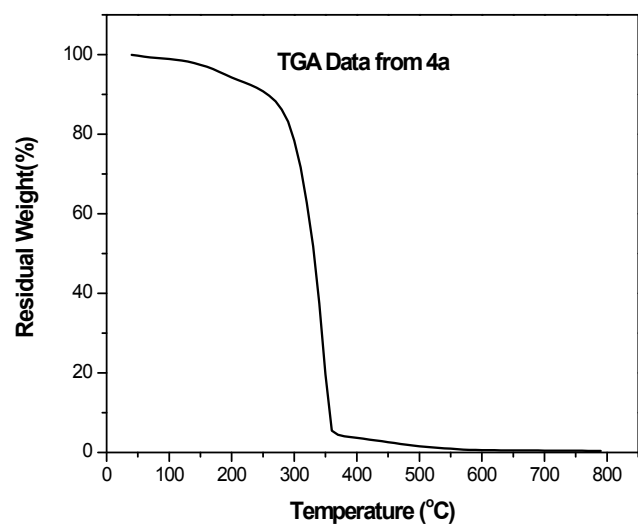

Figure FS64. Representative TGA trace and derivative plot of PLA catalysed by **4a**.

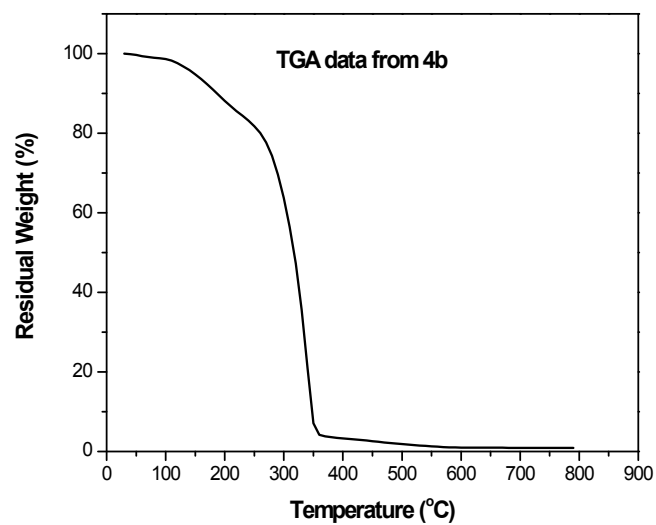

Figure FS65. Representative TGA trace and derivative plot of PLA catalysed by **4b**.

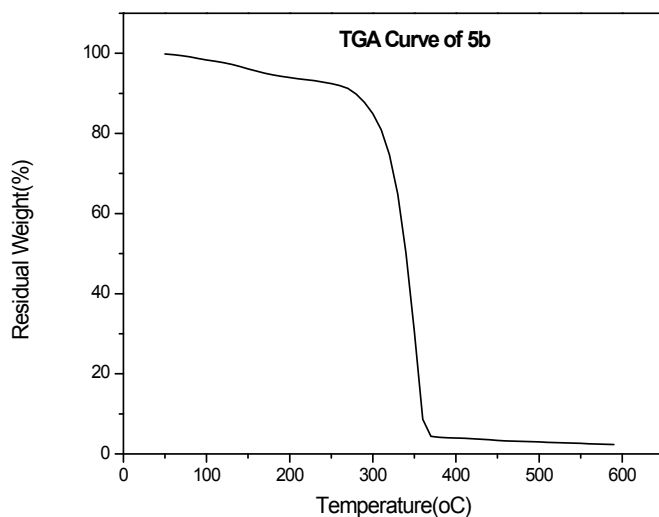

**Figure FS66.** Representative TGA trace and derivative plot of PLA catalysed by **5b**.

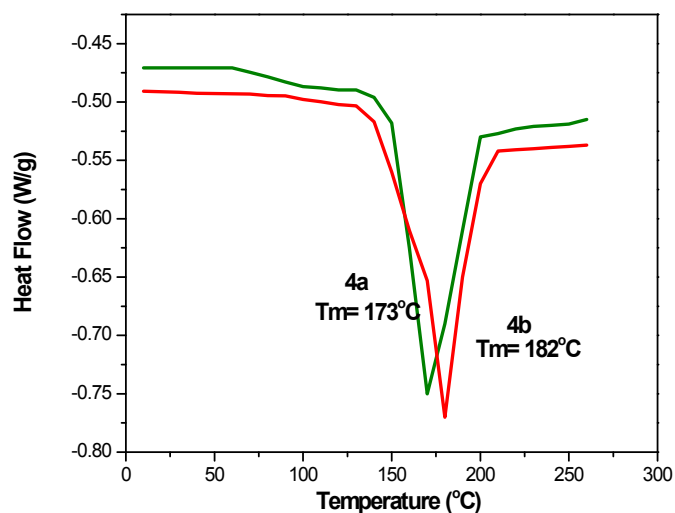

**Figure FS67.** DSC trace of PLA catalyzed by (**4a** and **4b**),  $P_i = 0.75$ ,  $M_n = 26.2$  KDa for **4a** and  $P_i = 0.78$ ,  $M_n = 13.4$  KDa for **4b**. Second heating curve shown, cooling curves omitted for clarity.

Two samples were measured, PLA having different molecular weight also catalyze by two different initiator taken for measurement. DSC samples were heated to 270°C and then cooled at various rates (quenched cooling 0.1, 0.5, 1, 5, 10 °C/min). The measurement was done using DSC6220 Differential Scanning Calorimeter. For the DSC measurement 10 mg of the sample was heated from 10°C up to 270°C at 10°C/min in a nitrogen atmosphere.

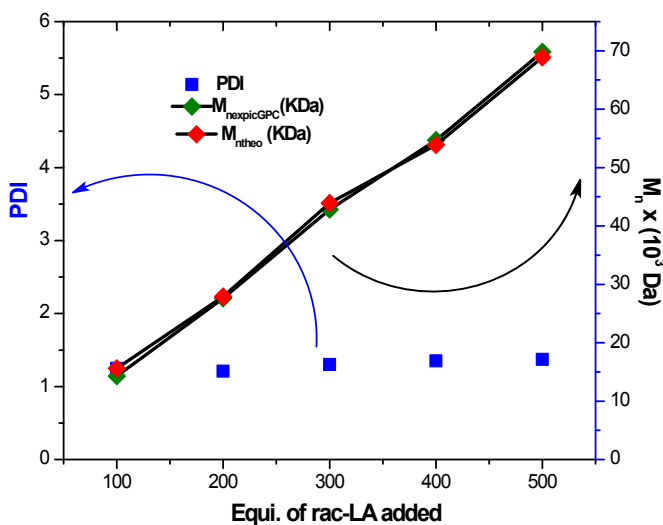

**Figure FS68.** Plot of observed  $M_n$  and molecular weight distribution of PLA as functions of added rac-LA with respect to catalyst **5a** ( $M_n$  = number averaged molecular weight, PDI = polydispersity index). The line indicates calculated  $M_n$  values based on the LA: initiator ratio. All reactions were carried out at room temperature in toluene, and conversion to polymer samples was >90%.

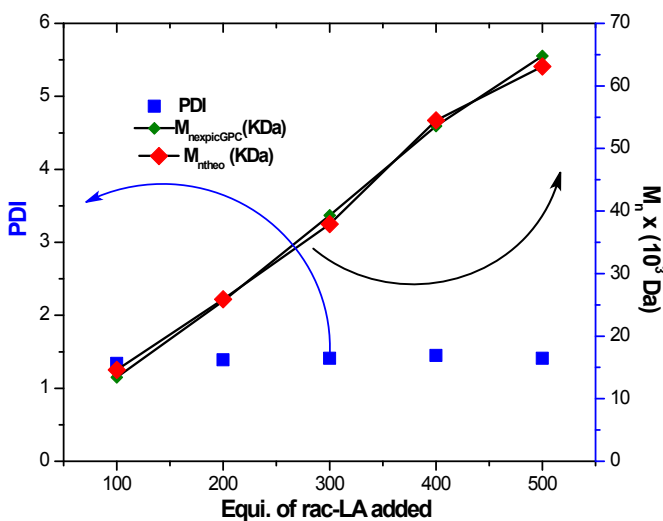

**Figure FS69.** Plot of observed  $M_n$  and molecular weight distribution of PLA as functions of added rac-LA with respect to catalyst **4b** ( $M_n$  = number averaged molecular weight, PDI = polydispersity index). The line indicates calculated  $M_n$  values based on the LA: initiator ratio. All reactions were carried out at room temperature in toluene, and conversion to polymer samples was >90%.

## Caprolactone Polymerization

A typical polymerization procedure is exemplified by the synthesis of poly( $\epsilon$ -Caprolactone) at room temperature (TableTS15, ).  $\epsilon$ -Caprolactone (0.114 g, 1.0 mmol) was added to a solution of **4a,b-5a,b** (0.01 mmol) in toluene (5 mL). Immediately the monomer become converted into polymer, so the reaction was then quenched by the addition of a drop of 2(N) HCl and methanol. Then the solution was concentrated under vacuum, and the polymer was washed from hexane. The final polymer was dried under vacuum to constant weight.

**Table TS15.**  $\epsilon$ -caprolactone Polymerization in the presence of alkali metal complexes bearing phosphinamine selenoid ligand.(4a,b-5a,b).

| Entry | Catalyst | [ $\epsilon$ -CL] <sub>0</sub> /<br>[M] <sub>0</sub> | Time<br>(min:s) | conversion <sup>b</sup> | M <sub>n</sub> (theo)<br>[(KDa)] | M <sub>n</sub><br>(GPC)<br>[(KDa)] | M <sub>w</sub><br>(GPC)<br>[(KDa)] | PDI  |
|-------|----------|------------------------------------------------------|-----------------|-------------------------|----------------------------------|------------------------------------|------------------------------------|------|
| 1     | 4a       | 100                                                  | 02:00           | 99                      | 11.3                             | 13.1                               | 14.9                               | 1.13 |
| 2     | 4a       | 200                                                  | 01:00           | 98                      | 22.3                             | 21.5                               | 27.5                               | 1.28 |
| 3     | 4a       | 300                                                  | 01:00           | 95                      | 32.5                             | 33.2                               | 43.8                               | 1.32 |
| 4     | 4a       | 400                                                  | 01:00           | 96                      | 43.7                             | 45.9                               | 61.0                               | 1.33 |
| 5     | 4a       | 500                                                  | 01:00           | 98                      | 55.8                             | 57.4                               | 67.7                               | 1.18 |
| 6     | 4b       | 100                                                  | 01:00           | 99                      | 11.3                             | 11.4                               | 15.2                               | 1.33 |
| 7     | 4b       | 200                                                  | 01:00           | 99                      | 22.6                             | 20.4                               | 23.3                               | 1.14 |
| 8     | 4b       | 300                                                  | 01:00           | 96                      | 32.8                             | 35                                 | 41.3                               | 1.31 |
| 9     | 4b       | 400                                                  | 01:00           | 97                      | 44.2                             | 50.3                               | 65.8                               | 1.22 |
| 10    | 4b       | 500                                                  | 01:00           | 98                      | 55.8                             | 56.4                               | 59.2                               | 1.05 |
| 11    | 5a       | 100                                                  | 00:30           | 99                      | 11.3                             | 12.5                               | 13.1                               | 1.04 |
| 12    | 5a       | 200                                                  | 00:30           | 98                      | 22.3                             | 25                                 | 32                                 | 1.28 |
| 13    | 5a       | 300                                                  | 00:30           | 98                      | 33.5                             | 32                                 | 40                                 | 1.25 |
| 14    | 5a       | 400                                                  | 00:30           | 97                      | 45.6                             | 43.5                               | 51.3                               | 1.18 |
| 15    | 5a       | 500                                                  | 00:30           | 98                      | 55.8                             | 57                                 | 64.9                               | 1.14 |
| 16    | 5b       | 100                                                  | 00:30           | 98                      | 11.1                             | 12.7                               | 13.0                               | 1.03 |
| 17    | 5b       | 200                                                  | 00:30           | 99                      | 22.5                             | 24                                 | 28.8                               | 1.20 |
| 18    | 5b       | 300                                                  | 00:30           | 97                      | 33.1                             | 32.5                               | 39.6                               | 1.22 |
| 19    | 5b       | 400                                                  | 00:30           | 98                      | 44.6                             | 44.5                               | 51.1                               | 1.15 |
| 20    | 5b       | 500                                                  | 00:30           | 98                      | 55.8                             | 58                                 | 63.8                               | 1.10 |
| 21    | 5b       | 1000                                                 | 00:30           | 95                      | 108.3                            | 110.9                              | 138.9                              | 1.25 |
| 22    | 3a       | 100                                                  | 1400:00         | 49                      | 5.58                             | 13.1                               | 21.3                               | 3.81 |
| 23    | 3b       | 100                                                  | 1400:00         | 47                      | 5.24                             | 13.1                               | 20.1                               | 3.84 |

In toluene at 25°C, [Catalyst] = 1 mM. <sup>b</sup> Conversions were determined by <sup>1</sup>H NMR spectroscopy. M<sub>n,theo</sub> = molecular weight of chain-end + 114 gmol<sup>-1</sup> × (M:1) × conversion. <sup>c</sup> In THF (2 mg mL<sup>-1</sup>) and molecular weights were determined by GPC-LLS (flow rate ¼ 0.5 mL min<sup>-1</sup>). Universal calibration was carried out with polystyrene standards, laser light scattering detector data, and concentration detector. Each experiment is duplicated to ensure precision.



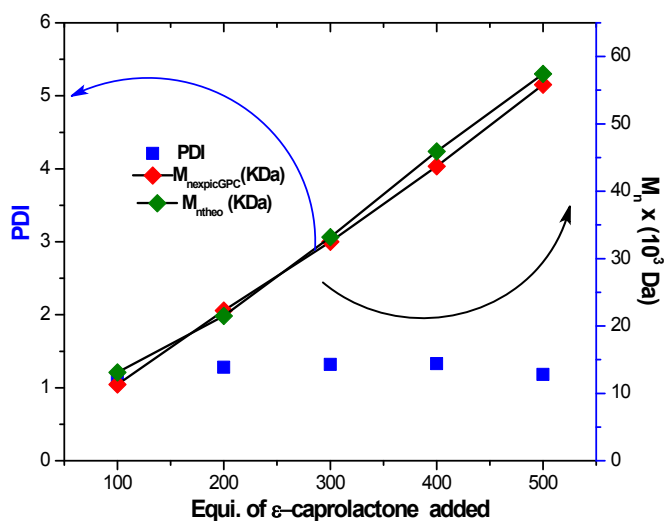

**Figure FS70.** Plot of observed PLA  $M_{n,theo}$  and  $M_{n,expi}$  (■) with molecular weight distribution (PDI) (◆) as functions of  $\epsilon$ -CL : **4a** in (25°C, Tol, 99% conv.) The line indicates calculated  $M_n$  values based on the  $\epsilon$ -CL : **4a** ratio.

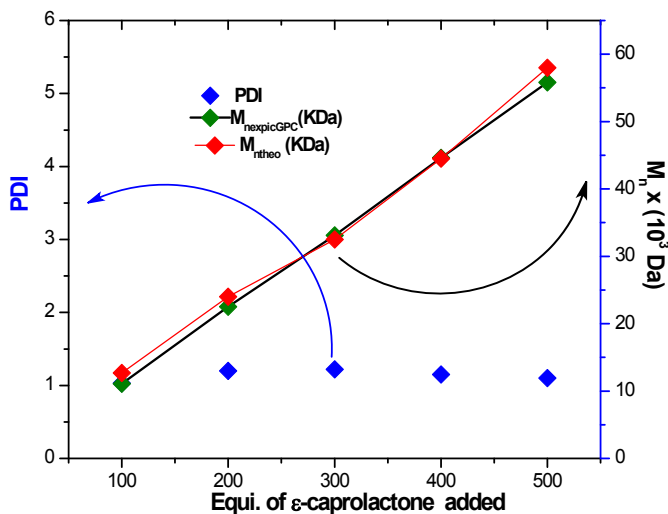

**Figure FS71.** Plot of observed PLA  $M_{n,theo}$  and  $M_{n,expi}$  (■) with molecular weight distribution (PDI) (◆) as functions of  $\epsilon$ -CL : **5b** in (25°C, Tol, 99% conv.) The line indicates calculated  $M_n$  values based on the  $\epsilon$ -CL : **5b** ratio.

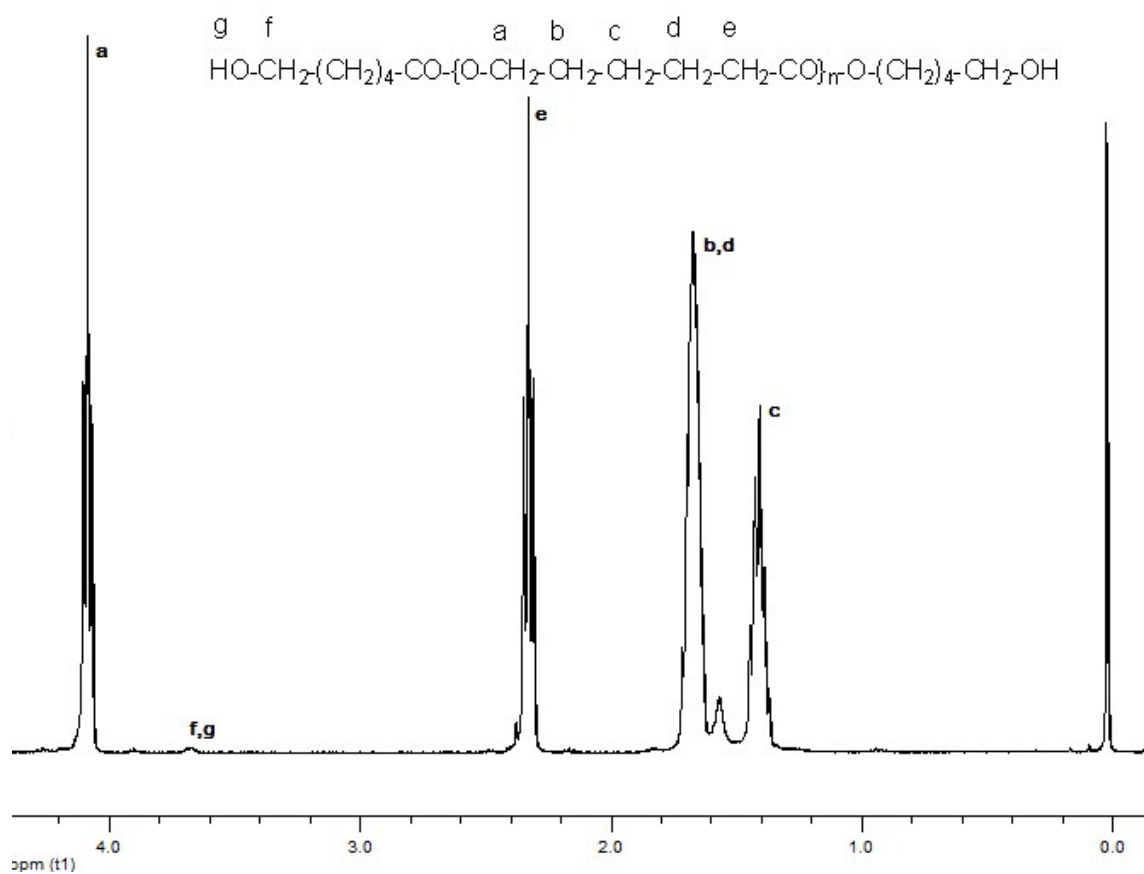

**Figure FS72.** <sup>1</sup>H NMR spectrum (400 MHz, 25°C, CDCl<sub>3</sub>) of Poly(ε-Caprolactone).

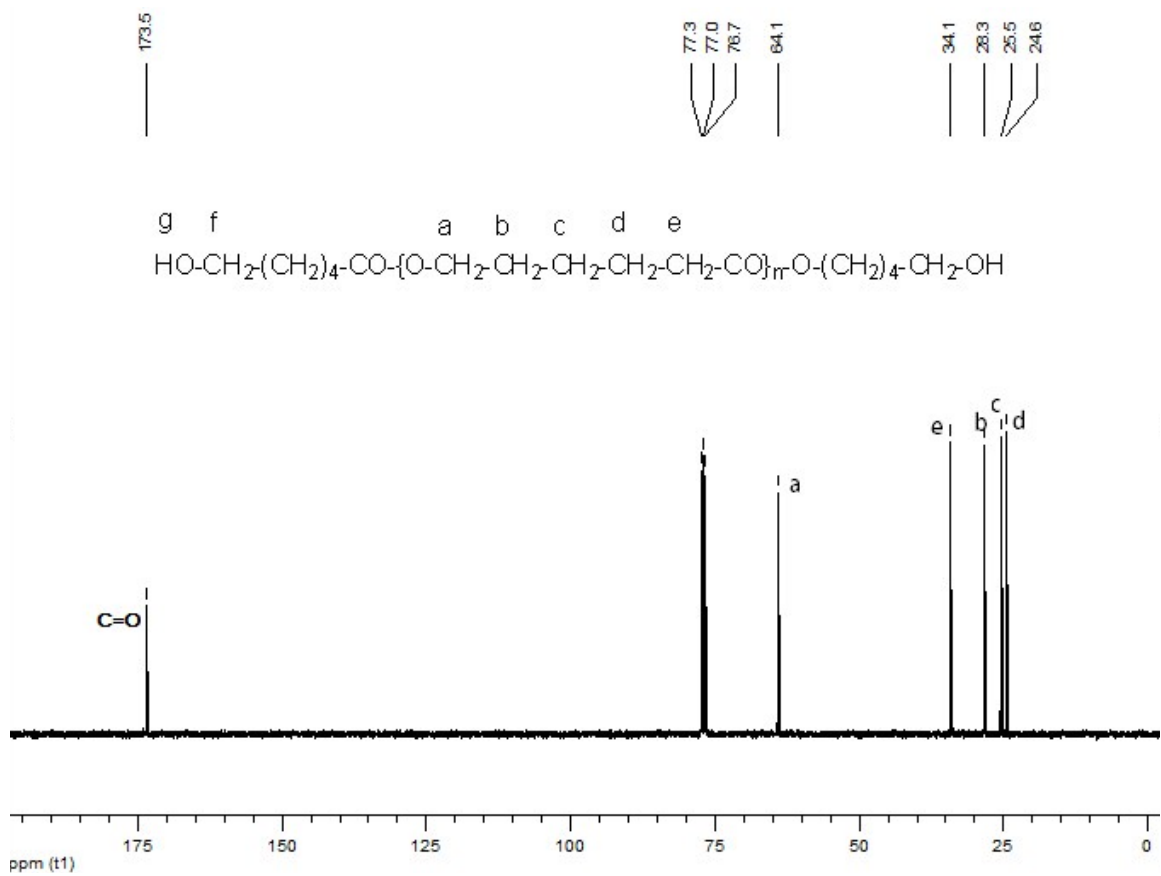

**Figure FS73.** <sup>13</sup>C NMR spectrum (100 MHz, 25°C, CDCl<sub>3</sub>) of Poly(ε-Caprolactone).

## valerolactone Polymerization

A typical polymerization procedure is exemplified by the synthesis of  $\delta$ -valerolacton at room temperature (TableTS16).  $\delta$ -valerolacton (0.114 g, 1.0 mmol) was added to a solution of **4a,b-5a,b** (0.01 mmol) in toluene (5 mL). Immediately the monomer become converted into polymer, so the reaction was then quenched by the addition of a drop of 2(N) HCl and methanol. Then the solution was concentrated under vacuum, and the polymer was washed from hexane. The final polymer was dried under vacuum to constant weight.

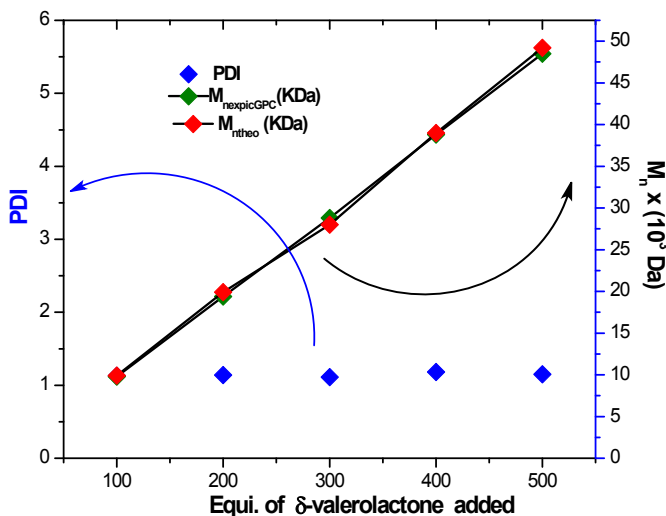

**Figure FS74.** Plot of observed PLA  $M_{n,theo}$  and  $M_{n,expi}$  (■) with molecular weight distribution (PDI) (◆) as functions of  $\delta$ -VL: **4b** in (25°C, Tol, 99% conv.) The line indicates calculated  $M_n$  values based on the  $\delta$ -VL: **4b** ratio.

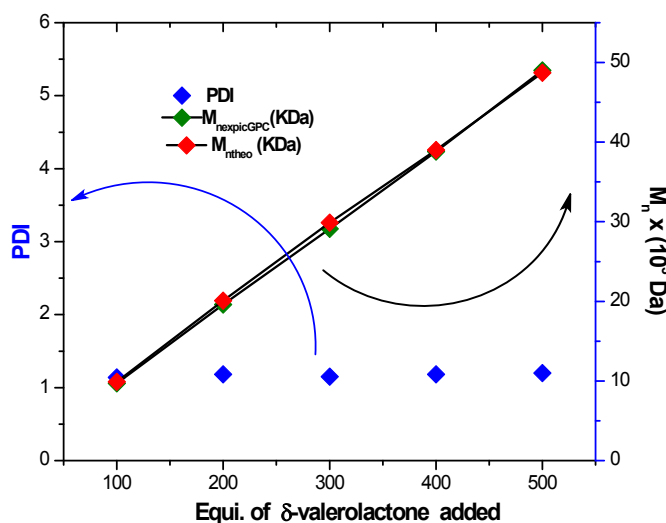

**Figure FS75.** Plot of observed PLA  $M_{n,theo}$  and  $M_{n,expi}$  (■) with molecular weight distribution (PDI) (◆) as functions of  $\delta$ -VL: **4b** in (25°C, Tol, 99% conv.)

as functions of  $\delta$ -VL: **5a** in (25°C, Tol, 99% conv.) The line indicates calculated Mn values based on the  $\delta$ -VL: 5a ratio.

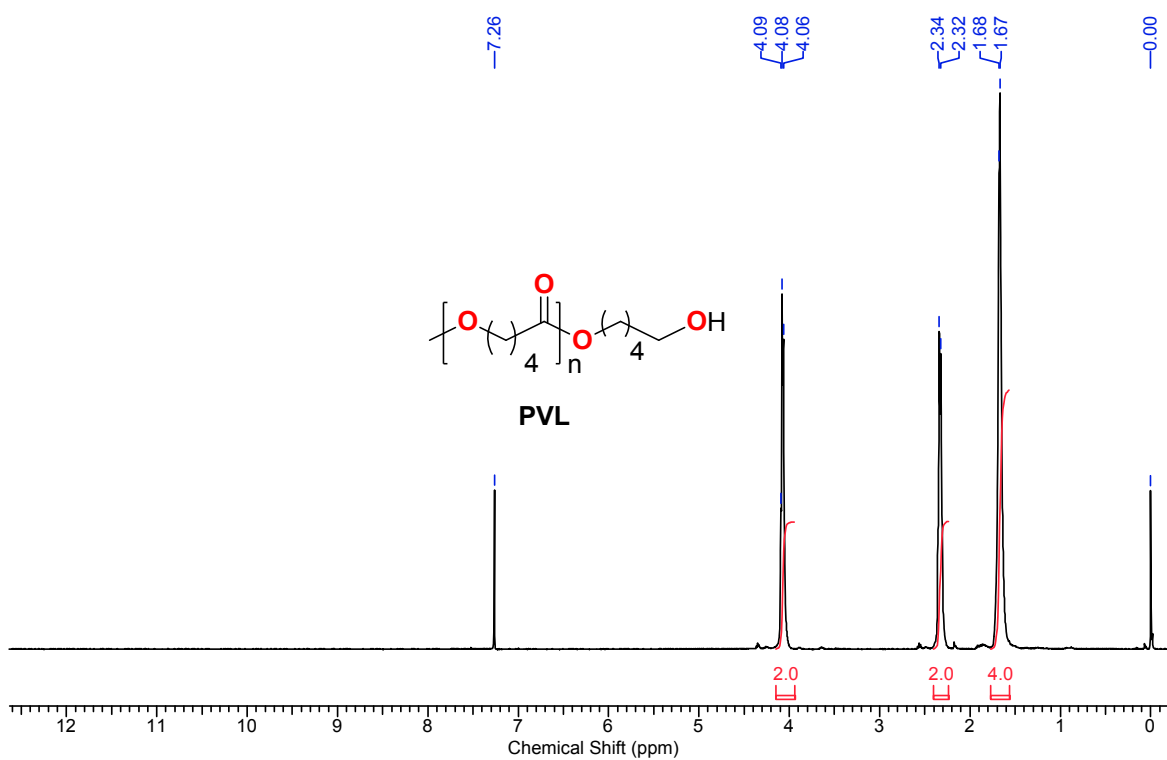

**Figure FS76.** <sup>1</sup>H NMR spectrum (400 MHz, 25°C, CDCl<sub>3</sub>) of Poly( $\delta$ -valerolactone).

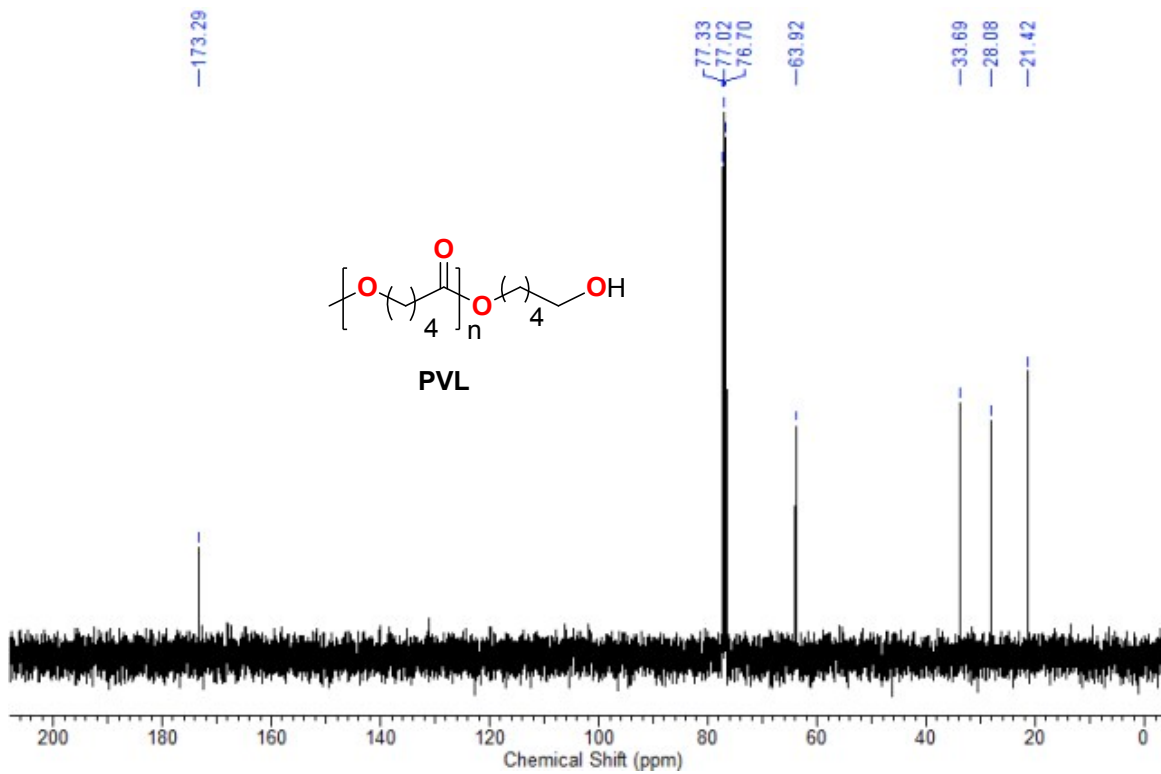

**Figure FS77.** <sup>13</sup>CNMR spectrum (100 MHz, 25°C, CDCl<sub>3</sub>) of Poly(δ- valerolactone).

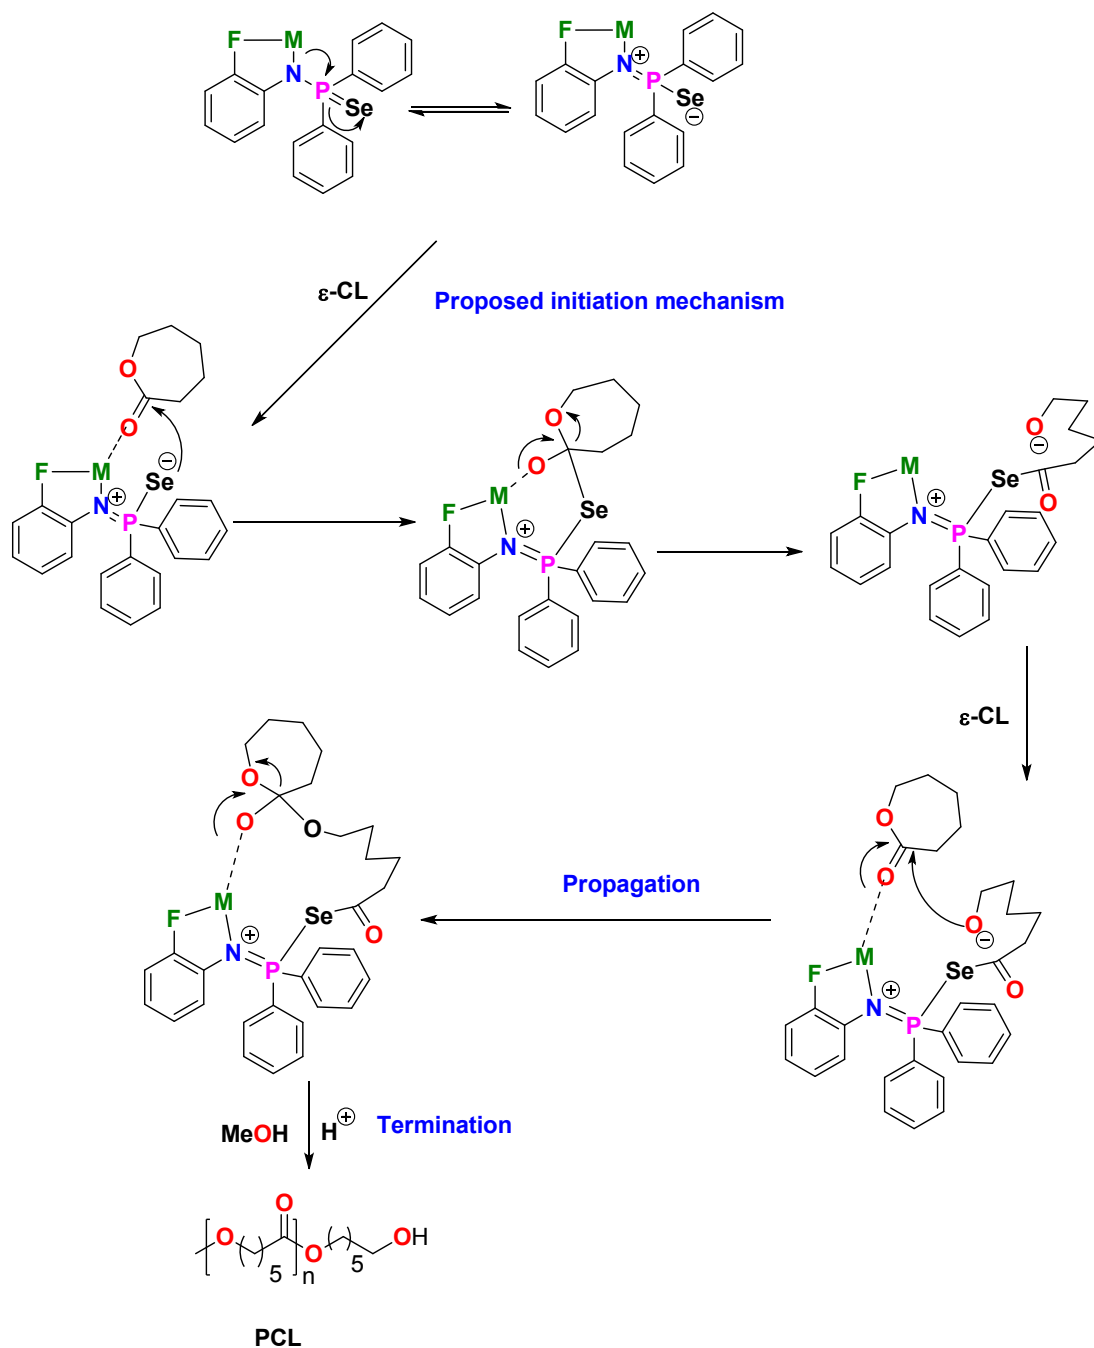

**Figure FS78. Plausible mechanism for ring-opening polymerisation of  $\epsilon$ -Caprolactone initiated by Alkali metal complex.**

**Reference.**

1. Bhattacharjee. J.; Harinath, A.; Nayek, H. P.; Sarkar A.; Panda, T. K. *Chem Eur. J.* **2017**, *23*, 9319 – 9331.
2. Harinath, A.; Bhattacharjee. J.; Nayek, H. P.; Sarkar A.; Panda, T. K, *Inorg. Chem.* **2018**, *57*, 2503–2516.

3. Douglas, A. F.; Patrick, B. O.; Mehrkhodavandi, P. *Angew. Chem. Int. Ed.* **2008**, *120*, 2322-2325.
4. Yu, I.; Acosta-Ramírez, A.; *J. Am. Chem. Soc.* **2012**, *134*, 12758-12773;
